# Supplementary material for: Environmentally Selected Aphid Variants in Clonality Context Display Differential Patterns of Methylation in the Genome
Source: PLoS One. 2014 Dec 31;9(12):e115022. doi: 10.1371/journal.pone.0115022 (PMC4281257; doi:10.1371/journal.pone.0115022)
Supplement: S3 Table — List of methyl reads found at least five times in samples. List of 1200 methyl reads found at least identically five times in one or the other sample or in both. The sequences of each read is provided along with the number of copies in one or the other sample. (XLS) [file pone.0115022.s017.xls]

## Sheet: Sheet1
seqnr	seq	length	total	green	pink	samples
00103	TAATAAATATATATTTTATACGAGCAGCGGCCCACCGGGAAATTTCCCGGTATCCAGGTCGTCCAGTCCGCCACTGGGCCACTGAAAATAATGTAATGACGAGGTGCCACTATGTGTATAATACTATAATGTTTATGCCTAAAATATTATAGTATATGTAATATGAAAAGCAGAAAGA	178	7	5	2	2
00205	TAAAAAGTTGAAATTTTCACAGATTATGTATTTATGTTGCCGCTATAACAAAATATACTAAAAATCCTAGAATATACAATATAAGCAGTGTTGCCGACATATTTATAGTTGATTATGGTACGGAACCCTTCGGGCGCGAGTCCGACTCGCACTTGGCCGGTTTTATTTAGATGAATATCATAAGCCCAGCACTAATTCTCAATTTCATAAGAAATAATTGAATGAACTAGTGAGATATACATTATTCTT	249	6	2	4	2
00404	TAAAATAGATAAGTATTCATTTTCAGGTAGAGATTCTAAAGATAGGAGACGTAGATCACCACCTAGACGACATCGTCGTTCTAGGAGTCCAGTACGTCATAAATCACGTACACGTTCAAAAACACCTGTAATGGTTAGACCAAGATCTCGTTCACGTTCTCTTGGACGTTCTCGTTCAAGATCTCGTTCACCTTATTACAACCGTAATAATAAATACTCTAGTCATCGGTAA	232	5	2	3	2
00291	TAATGTCAACTGAACACAAAAATAACAGTACAAATATATATGATTTCTATTTTCATTTTTATCAGTACACAAGTTTTGTACATACATACTCACGCTACGCATAATTTTTTATTTTTACGTAGCTTTGCGACACTACCGCTTCACTGGATAA	151	5	3	2	2
00057	TAAATTCATACGCGCCACTCCGACAATGGCGCGTTTCCCTCGCCGGTATGGCACGTATGAACTTGATCAATGTAAACTAAAAACACGCACGTATGATACCCGTTCATGTGAAATGGGCCTAAATTCAGA	129	10	8	2	2
0011C	TAAAACAAATATAAATAAAATACTTAGCACATTCAGATTGCCTGGTCCGTACTATGATCGACGTTTCACACGCTCGATCGTCGTACCTACGTTTTCGCCAAAACGCTCAGCGACAACGGGACTGCCCGTGCCTAAGCGTACGGCGGTGTTATAAAAGAGAATTTTATTGCTGCCTCAGCGGCTATAGTCAATTTACACAAAAA	203	7	5	2	2
00302	TAATTTTTGTGTAAATTGACTATAGCCGCTGAGGCAGCAATAAAATTCTCTTTTATAACACCGCCGTACGCTTAGGCACGGGCAGTCCCGTTGTCGCTGAGCGTTTTGGCGAAAACGTAGGTACGACGATCGAGCGTGTGAAACGTCGATCATAGTACGGACCAGGCAATCTGAATGTGCTAAGTATTTTATTTATATTT	200	5	4	1	2
002C4	TAATGCGTCAGCGGCGTTGAAAGTAGTGGTGGGTCGTTACTGTTGTATTCGGTACTATCAACTATGTAACGATTACATTGGTGGAACGAGTAAGAAAGAGTACATACGGAACAATACGAATGAGAGTACAAGTGTAACTAAATAAAGAATGTGCTGATTGTACCAATGTAACGAGTATTTTGGAAGTACTTTA	193	5	1	4	2
00408	TAACGGAGCTAAACGTGATCTGCTGAGCGTAACTTTGCGTAACTTGTAAGATAGAGACAACAAATATTTGTGTGGCGTCCTC	82	5	2	3	2
00464	TAATATATAGCACAAAAATGGCAACAAATTCAATCTAAAAGATTTGCACCTAAACGTAAATTTGGTTTTGTCGATGCACAAAAAGAAGACATGCCCCCCGAACATATACGTAAAATAATCAGAGACCACGGTGACATGAGCAGTCGAAAATATCGTCATGATAAAAGAGTTTATTTAGGGTATGTACAACCAAGAAAATAATGGCATAAATGTTGTTATTTCCAACACA	229	5	5		1
00498	TAAGACTCGGCTCTTACTCGGCACCCGGCGTAATATCTACATTTTTACCCGGCCATTACTCGGTGTCCGGCATAATACCTTCATTTTTACCCGGCTACTACTCGGTACCCAGCGAAATACTACATTTTTACTCGACTCATATCCAATGGCAAAAACT	157	5	4	1	2
00307	TAATATTTGTGCCTAAAAAGGGCAGTAAACTAGTGACGCGCGAACGTGCAAAAATCGTAAAATAGCGAACTTCA	74	5	1	4	2
00474	TAACACATTGGAGACGAGTACTGTGTTAGACACGGCCACGGTTGTAAGATACGTGAGACGCTAGAATTTTTACAATGGTAATACGTTGGAGACGAATGCCGC	102	5	3	2	2
003C5	TAACATGGATTACGCCCCTATCACATCTGTTGACGTAGAACGGTCTTTTAGTCAATACAAGAGTATACTCCGACAAAACCGTCGCAATTTTCCATTTGCAAACCTTCAACAATATGTTGTTTCTCATTGCTTTGTTCCGGAATAATAGTTTTATATACCTACATCGTTTGTAATACTTTTATTTATAAAATATTTTTTTTGTAATTTTCAGTACCTACCCACTAATACATTTTTTCAATATACATA	246	5	3	2	2
001CE	TAAATTATAGCAAAAACTTACTCTTCAGCATCAAATAAATATTCATCGTCTATGATATCGGCTTCCAGTTCCGTAACCTTGTCATCTTTTCTTTTTTCGAGATATTTACGACGAGACTCAATACGCAGTCGAGGAATGACCATTTCTTTCTCACGTTCATTTTCTATTTTCAAACGTTTCGCTGCTTCTTCGTAAGCTTTCTTATCTAACCAA	213	6	4	2	2
00076	TAATTGGTTAGATAAGAAAGCTTACGAAGAAGCAGCGAAACGTTTGAAAATAGAAAATGAACGTGAGAAAGAAATGGTCATTCCTCGACTGCGTATTGAGTCTCGTCGTAAATATCTCGAAAAAAGAAAAGATGACAAGGTTACGGAACTGGAAGCCGATATCATAGACGATGAATATTTATTTGATGCTGAAGAGTAAGTTTTTGCTATAA	212	9	4	5	2
0041A	TAAAATGATTATCTTAGATGACATTTCTCTATACTCTATTCGTAATGAGATCGTACCCCGGCAGCCAAGTTGTGCTCATGGGTGTGGCTTTATTCCGTGGCAGCGCCCAACGTGTCGCCGTAATGGGGACGGCGTCTGACCATATGTCTGACCGCCGCCCTACGAAAACTGGGTGCCGCTGGGTTACGGATCTCATTCCGACTAGAGTAAACATTTTAGGAATAGGATACTTCAAAGAGCATAATTTGTTTA	252	5		5	1
000FA	TAACAATGATTTTTGAATAAACAAATTATGCTCTTTGAAGTATCCTATTCCTAAAATGTTTACTCTAGTCGGAATGAGATCCGTAACCCAGCGGCACCCAGTTTTCGTAGGGCGGCGGTCAGACATATGGTCAGACGCCGTCCCCATTACGGCGACACGTTGGGCGCTGCCACGGAATAAAGCCACACCCATGAGCACAACTTGGCTGCCGGGGTACGATCTCATTACGAATAGAGTATAGAGAAATGTCAT	252	7		7	1
003BC	TAAAATAATATATTTGGATATAGTGGTTGCTACTGTATAATACAGTAATCCCTCGTTATCCGCGAAGGTTACGTTCCAGCAAACCTGCGCGGATAACGAGACCAGTAGTTATCATAGACCCATAAGTACATATATGTATGTATAGTGTATATGTGTTATACCTATAGCGATATAACAACAATTATCTACAATTGTCAAAAATAAATTTCTACAGTGTTCGTGTAATAACGGTAAAACGTTATCGCAATCGCA	252	5		5	1
00442	TAATAAGAATGATTAGAAATAGTTCGAGGAGCATAAGTGAACATATGTCACCAGTGATGATCCAGTCAAATAATAATACGTTCAGTTGCGCCTGTAAGGATGGTATGGTTGTGCTTGGTTTGAATTATAATTATTCGCTCTGGTTGGTCCTGGGGCGTTATTGTACGTCGCCGCCGGTACTCCGGCGGAAACGACTGGCGTCACTACTGGGGCCACTAAATTATAGAAAGTTGACAATTT	240	5	1	4	2
003B0	TAATTTCTAATATAAGATTATCGCAGTGCACGTGGTCTTCAAAACCTCTGATCAACGAATCCACAACTTCAGAGTAGAACATGCACGTGTCATCGGGTATGGACGCTGCCACTGATGCAGTGTCATCGTCAGATGAAGAGCAACTATTGGTTGACCAAGTTCTCTTACGAAACGTCAGGCCTCTGACATCTTGATCGTCTTCCGAATCAGAATCGTCTTCAGCG	224	5	5		1
000AC	TAATATCCAGATCATTCACTTTTTCAGCAAACTCCTCCAACAGGTCTTTGGCGGCTTTCACGGGCTTCAACCGAATCCACGCTAATTTTTCGTTTTCAACTATTTTCACAAAGGCGACTTGCCATTCAAATTCAACGCAAATTG	144	8	3	5	2
001C9	TAACGGCCTATTGGAATATCTGTTGACGCGTATTAGCGTCAGCGGCGTTGAAAGT	55	6		6	1
002A7	TAATGTGTGCGTAGTAAGTGATCATTAGTGAATGTGACTGAGTGTAAATAAAATAGCAAAGCGCCCGCACGTGCATGTACAAGTCACCGTCTCGGCGTTGCGCGCTTGAGCGGTAAACAATTTAT	125	5	4	1	2
0009A	TAAAAGCATGTCTAGATGGACGCCTCGATCGAGAAGATGAACGATCACGTCGATCC	56	8	2	6	2
002E0	TAAAGTGATATTAGGCCATTAGGGCGATCAGATAATCATTCATGAGTGAATTATTGTCTGGTGGGACTGTAAATTGTACTGCCATGATCAGGGGCGGACTTACTATTTTTCCGCCGCGTACATTGGCGTGCTCCCACGGAGAGGGGTAGATAATATTCCATGAAATAAAACAAAACTATAAAAATTGTTTA	191	5	4	1	2
0040B	TAACCGCCGGCAACCCAAATAATTTGTATTATTCAGGTCTTTCCGATTATAACGCTATATTGAAAATTACGATTGGACTCTCCTATCGCTAAATACACATGAGTGCATTACAGTAATGCTTTGTTATTTATACCATAGCTCCACAATTACCCATCCGTGTTGGGTCGCCGGCGGGCTCGTGGCAGTCAACGT	192	5	4	1	2
002B7	TAACACCGCTCCGTTTCTACAGTCCGCTCGGCCCGTTTCCGTGGATTCCTTAGCGCGTCCAATCGCGTACCTTTGCCGCGGCGGCGGTCAGTCGGTTTTCAAATGTTTCGAAAATAAAACTTTTTCGAAAAACGTTACACTTTTTACGCCGTTTTTGGCCAGCGTCGGTCGCCGGGTCCGTAGCGAA	187	5	1	4	2
00213	TAAGATTGAACTGGCGGCTCGACCAAAACACGGTTTTTTCATGCATTTTGGACATTGGTGGGAACGTATGCACGGCGGCCATCACCGGTACCGACAATTGACGACGGCCGGCGATGACTGTTGGTCAATCATAGAATGCATAGCCATCGCATAGGGGGTCAGGCACTGTTCGGCAGCTCAGTCTGCATGCGCGAAGCCGGTTCAAT	206	6	4	2	2
00122	TAAAAATATAAATGTCGTTCACGTTCTGTTTTGATAAAACGAGTGACGTTCACGTATCTTTCACTAAAAATGAACGTGAACGCGTGAATGTGCGTTCATGAACGACGTTCTTTCCAAACAC	121	7	1	6	2
001AE	TAACGCGTTTTGTCTATGTTGCGCGTGGGCCAGAGAGAGAAAACGAATAGTGCGCTGATATCCTC	65	6	4	2	2
00378	TAATTTGCGATATTTCAAATACCCATATTATGGTTCTATAAAGGCGGGTTCACAACTGCCCGTATCGTGTCGTGTCGTGTAAAATCCTTTTTTCTGATTGGTTCACCAAAATATGATAATAAAATATGATCGTGTCGACCAACACGATACCGTGATTACCGCGAAGTTGAA	171	5	4	1	2
0002D	TAAAACCAAGTACTTTACAGTATTATCTTAGAAAAAACAGTATAACATTTATATAGTCCTGCCCGCGAGAGTCCATACGTGCTAACGCGTCCGTCGCTGCACATCGGTTCCCCTTCCATAAGCCGAATTATACTGATCGGAAGCCGGCCGTCAATGATCGCCAACAGCCGTCGTTGACATTCTTGTATACGTAGCAACAGTAATAAACACGTTTTTACGAAATTTGA	227	14	7	7	2
00357	TAACGAGCCGCTGTTTTCACATTGCCAAGTGTTGGGAATGGCACTATGGTGGGAGGAAATTCGGCCGGCAGACGTCGCGTACGCCAGTATCGATGCGCGGTTTATGTATGGACTCTTGTGGGCTGGACTATAGTTAGGTACATTCAAAAATAAGTTATTTTGTGT	165	5	2	3	2
0029B	TAATTTTGAAAGTAGATTTGAATTTGTCACTATAGTAAGGCCGTTGTAAGAACGCTACTGAGCGGCTACCAAAATTCATCCGATATCGTGCATTCTCACCACTAAACCTTCCCAAACATGCTGGCCGACGCCACATCCTCGCTGCCGCTACTGTCGCTGCCACTACCACAGACGCGCCGCAGCGAGTGGGGGAATTTATGGCGGCGACTAGATGGTAGAGTGGGAGAAATTTGGGTAAGAAACTGCGG	248	5		5	1
00104	TAAGGTAATCTCGTAAAACTGGAAAGTACCATTTTGGTAGTCTTAGATAAAAGGATTGTGATGTTTCACAAAATATGCGCTGTAGTCTCGATAACGGAGGTAGTCTTGGGTGATAGTCGCGATAACAGCCGTAGCCTCGTATAACAGGAAAATACCCAAAAA	162	7	2	5	2
00216	TAATAATAACATAACTTGAATGTATCCACAATTTATATAGCTACTCACTTGTCGTTGAAACCGCAAACCTCTTCTATAAGCATAGATCGTTCACTACGTGTAGCGTGCGTTACACATTTCTCCACAACGTTTGATGCAAACTTATGCTGGGACAGTGTCAACACCTTTCCGCGGACAGAGCATA	184	6	3	3	2
003AD	TAACTGGGGCGTTAGTGGAATCGAAGGAGATACGGATTTGAATGATTTACAAGACACTGTGAAAAAGAAGTTCGGCCCGTTTGCGTCTGGTTTGCCCAATATCGATCAGCTCAATGAATCTATACCGGCCTTAGACGAAGGTGAAAGAGTGTTGAAAGATAAAT	164	5	2	3	2
000EC	TAAACATTTATCTTTCAACACTCTTTCACCTTCGTCTAAGGCCGGTATAGATTCATTGAGCTGATCGATATTGGGCAAACCAGACGCAAACGGGCCGAACTTCTTTTTCACAGTGTCTTGTAAATCATTCAAATCCGTATCTCCTTCGATTCCACTAACGCCCCA	165	7	5	2	2
00158	TAAAAATGTTATACTCTATTCACCGAGTTGACCCACTTGTGTGCATGCATACTGAGCCGCCGGAACATTCAGACCCCCTGAGTAGGCGACCAGCGGTCTGAGATTGGTCGGATGTGTTTGTCGCAGTAGGCAGCTGCTACTGGCGACGATCACCACTAGCGTTCCAAAGACGGGCCCAACCTGCGCGGCTGCGACCAGTTTTCGTTGAGCAAGTGGGTCAACTCTCGATG	230	7	7		1
00092	TAACACGTACGAACGCAAGCGAGTGCTACCGAACGAATGCAAACGCATATTCGCTAAACATTCGGTCGCGTCCATTTACATTGTTCACTCGTTCGTGTTCGACTGTCTTCGCTTCCACAAAAATGAAATGACGGATACGCGATACGGGCCTAATGCCA	158	9	6	3	2
001A1	TAAATGGCATTAGGCCCGTATCGCGTATCCGTCATTTCATTTTTGTGGAAGCGAAGACAGTCGAACACGAACGAGTGAACAATGTAAATGGACGCGACCGAATGTTTAGCGAATATGCGTTTGCATTCGTTCGGTAGCACTCGCTTGCGTTCGTACGT	158	6	1	5	2
00349	TAAACTATAGAAAGTTCTAAATTTATATTGTATTGTTTTAGTAATAAAAGAACTATAGATGATCCATTAGCAGTATTTCAGCGAATACTTCGAGAGCGTGACAGTAAACGTCGGGATATGAGAGTTCGTCATTCTATGTCCAGATCTCGATCTCGATCTTTATCTCGGTCTAGGTCTAGGGAACGCTCTCGTAGTCTAAGTCGTTCACCATCAAGGATTATGAATCATAGAACACGATCAA	241	5		5	1
003BE	TAACAATAAATGTATTTTGTTTTATATAACTATTATATACTCGGGTCCAAATAAGAACGCACCGCCTTGGCGCATCCAAATGAATCGCGGAGCGACGTCCGGACCCCCCGGCGTATCTATTCGCGCTGCGATTGGTCGCCATTAGTCGATTTCGGTCGCCACCGCCGACGGCGTCGCCAGCTGCTGCCGGAACAGACAGTGAAAGCGCGTTCTACCATGCGCGAGTTTTGACCGGTTTTCGTCCGCCGCCCGGTGCGTTCTTA	263	5		5	1
001F9	TAATTTTACGTAACAAGTCGCCAGTCGGTATTGTTTATTACGTGGTGAAAATACACCCGAAAATATACCGTAGAAAATTATTGTCGATTATACGTAC	97	6	3	3	2
00486	TAAATTGTGTAGTCTATATAAGCAGTGACGAGCTGAAGCGCTCAATGTTGACGCAATTGCGTGAGTGTGGCGTAGAAGTACAAGTCTGACTTCTTATCTCTTTTGATCACATTTTACTTACATCATAACTTTGTTATAAGTAAAATAAGATGGTGGTGGTGGTAAGTA	168	5	4	1	2
00426	TAAACAGAAACACGATTGTAGTTTTGAATTTCCGATTATGATCGACTAACATTATTTATCAGCTGATTATCGGAATATAATAATGGAATGAGAATAAAAATAAATTATAATGCCTATGCCGACGCGCAACGGTGCGTCAACGTCGAAAATAATTTGCTGAAAACAA	166	5	3	2	2
00476	TAACAGTTAGTTACAAAAATTGGTCTAGACATTTGAAATCTATTCGTCATCAAAACAATGATCCAGATCAAACAATTATACCTCGATTTAGAGGAACATACAGAGGTACAACAACAAAAAATGTAAGAACAAAACAAGAGAGAATACAAAGATCTGCAGATAAAACTTGTGATATTTGTAATGTAACA	188	5	4	1	2
001CB	TAATCATATAATTAGAATAACAAATAATACAAAAAAGGGAGTGTTGCGAGTACGTACGGATAAAGTGAAATTTTTTTACAGAGGATACGAAAAAAAACCGTCACGATACACGTTTCTCTGTATAAAAAAGAATAAATGTATCAAAACAAATTTATCAAATTTAGTGTCCCTGATTGGAATCGAACCTGTCATCGGAGCGTAACTGCCACGTTATTTTTTATATATACAGAGGGTATAGAA	240	6	5	1	2
002BC	TAAACATATCAAAAACCGATTGAAATCGATAACGGATAACATATCGGTAAACGATAAACGATTGAAACGAATAACGGA	78	5	5		1
003A9	TAATGATCTCCGATGCATGGAATGATTTTTCTACCACTACAATAAGAAACTGTTTCCACCACGCTGGATCCAAGGCTTCGGTAAACGACGAAACAGAAGTAGTAAGTGAAAATCATTTGGACACAGAGTGCTTTTCTGAAGAAAACATACAAAGTTTTGCGGAGGTTGACGATGCTCTTTTGACCAACGAAGAACCCAATGAAGAAGAAATTGTCAAGTCTATTTTGAATGCAAATAATGATGAAAGTGAACAAG	255	5	2	3	2
0012C	TAAGTTCGGTACACACGAGCGTTATTTCCAACGTACATTATTTTATCTTATGTATATTTTATATCTAAGTATATTTATATATAGATATAAAATACACTTGCGATAAAATAAAGTACGTTGGAAATAACGCTCGTGTGTACCGACCCTTAGTCACGGACTAAGATA	165	7	3	4	2
0019E	TAAGAGTACACCAGTTTGCGCATGTGCTACTGACTGCCGTATGTTGCCGTAACCCCATGATTGATCATTCTGAAACAATTTTACGCCAACGTGTACTGTGTTATTATTACCGCCATCGCTGTGTATCAGTGGTGGGGAACCATGTGTGAACATGACGTGTTTTCGTCGACCGCCCGGTGTACT	183	6	4	2	2
00488	TAACGTGCGCTGCTGTGGTCGACAAGTGAGGGAACTGGCGGCGAGCGATTACGGAAACGCGGAGCTCGTTCATTTAGATGCGCAAAGGAGTAGCGTTCTCTCAGTGCCGGTAGTATAGTTGGTGATCCCGCCCCCAGTTGATGCTAAACAATTGACAGTATATTTTAGGTAAGATTCACACACAACAACAGGATTCCTACAGGTATATCACACAAAATAAAATTTGTGGTACCAGCTGTAGAAC	244	5	5		1
00312	TAAACCAATGAAATAACGAGAACTACAATAGGCGTGGTGCGCTGGAATGGACGAGAACAAGTACCAATGTGATCATACCTATCTATTTAGTCATGGAATCAACTATATTCGCTGATAAGAAATAATAACAATCACCTACACCGGGCTACACGTGCTCTTGGGTTGGTGTGAAGAAAGTGTACACTGATGTAACA	194	5	4	1	2
00046	TAACAAACAGAAAAGGGATACAAATATTTTGCTATGTAAAAAAGAAAAAGAACCTAATAGAAATTACCCGGGTCCGACGACGATGGCCGGAGATGACGCAGTATTATGTGTCGTCGGCGTCGGCACCGGTTGTGTATGTCATTTACCATCACGTGACGCTCGCCGTCGTCTCGCAACATTCTCCGGGTCCACTA	194	12	6	6	2
000E9	TAATAAACCAATAACTTTCAGGTTGTAGTGATGAACCTATATCTAAAAAACGTGAACACCAACTGGAGGATGAACAGTCTACATCAGAAAACAAACGGCATTGCCCTGATGATGAAGAAATAAATGCGCAGGTGCAAAACGCCATAGACAGTATTTTGAATTTGCAACGCAGCGATCCGGCAACGGATGAAGCGGTGCGCAGCATTTTACCGTCCTAGCATACTGGTCATAGGAAATGTTTG	242	7	5	2	2
00463	TAAATAAAATGTATTTATTATTTTTTCTTTTGGTGTTATTTGTAACAGCTTATAATAGTCATTTATACGGGAGATGGAGTGGCCGAGCGGACTAAGGTTGCAATGCGCACCGTTGCCGGTTCAAATCTCAGTTACGGACGGCACTTCTCTCCGGGCAGACACCTGTCTGGAGAGACGAAGTCATTTATACCTATTACCTGGGCTATTACCTATATATTAT	220	5	1	4	2
00377	TAATTTTGTTTTCGATGTACAATTTACTATCCACGTATCTTGCCATCAGACCAGGTATTTATGTCGTCAGTCAGTCGACAGCCGTCCTTATTACGTCCATCAGTTATTATTTACTGTATAGTACATACGCGCTACGACTAGCCAACATGAA	151	5	2	3	2
00315	TAAACAGAAATACGATTTATCAGCGGATAATCGGAATATAATAAACAAATGAGAGTAAAAATAAATTATAATGCCTATGCCAACGCGCAACAGGCAGCGACGTCGGAAATAATTTGCTGAAAATAA	126	5	2	3	2
003F6	TAACGATCTTGTCATAGCAAGAATAACAGTTAGCGCTTTTGCATTATAGTGATTTCTCTTGGTACTACAAAATGTATCAATATAGATATACAATATTATGTATTGGAGCGCTAGTAGTTATTCTCACATCGTTGATCAGCTGTTAGAAATCAACATTTTCGCGCACCATTTTGTTGTGTATGTGCATAGGGTCGTTGAGTAACTTGTATATCTTT	215	5	5		1
00282	TAATCGTGGGACGAAGGAGGAACCACGTTAGCATTACTTCTCCTCCGGTCCACATC	56	5	3	2	2
003F7	TAATCAAATGCCTATACTCCATGATCACGAGAGAAGTAACCCGTGTCTCGACATAGTTCAGACCAATGGCGGTCAAATCCGTGCATCCCCTACCTATTTGACATGTCGACGTTGTACGACGACGACTGTCAACGGTCAGCAACGTTATATAGTAATACTACTA	163	5	1	4	2
0020F	TAAAATGATTGTTGAAACAACTTTAGTCTGTCCAGCGAGAGAATGCGCCGCTTCTGTGCATGTAGACTGACGACTTAGCGAGCGCCATGGCACTGTTTCCCCCTCTCACGGCCTGCGGAAGACGGCCACGTACAGTCGGTCGCCGAAACGTGCCGCCAGTCGGCGGGCCATCCTGGTGGGGGCACACCGGGCTGGGTATGCGCCAAAACAGACCAATTTAGGTTGGCGCACGGCGCGTTCTCTC	244	6	4	2	2
0013B	TAAACGGCAGCCTAGTTGTGCGCATGGGCGTGGCTTTGTTCCGTGGCAGCGTCTGACAAGTCGCCGTAGTGGAGACGGCGTCTGACCATATGTCCGACTGCCGCCCAACGAAAACTGGTCGCCGCCGAGTAATGATCTCATTGAGAATAGACTATAGTCAATTATTATCAAGCCAG	176	7	2	5	2
00295	TAAATCATACACTAACGTACATACAGCACGGGGTCCGCGATCTACCGCAGGTAGATTGCCTACCTGAAAATGTACTGCTGCGAATTAGAATTTTTATTCCGAGCAACGGAAAA	113	5	2	3	2
0025E	TAAATACGTGGCAATGCGCAGAATCAAACGTGTTTCGGTCGGGATACAGGTTCCTTCTCTCGTGACGCTCAGTATAAGACCGTACAATGGCGTGCTTTCAGATTTCCGCACTTA	114	6	1	5	2
003EC	TAATCATGAGGACATTTTATTATTTGTTTCGGATGCCGCGCCGTATATGAAAAAAGCTAGTCGCCGTATTCAAACACTGTATCCAAAAGCTTTGCATGTGACATGCTTAGCTCATGCCCTCCATAATGTGTGTGAAGAAGTGTGTGCACATTTCCCAAAAGTTGATCGTCTGATTGCCGAGATAAAAAAAACATTTCTGAAATGTCCAAAACGGATCGCTATTTTGAATGAAAAATGT	238	5	2	3	2
00231	TAATATTCGTACCTAATAGGTGCAGTGAACTAGTGACGCGCGAACGTGCAAAAATCGTAAAATAGCGAACTTCA	74	6		6	1
00220	TAAACGCAGCACTTTGCCTAAAGAATTTTGCTTTCTCCTTGGAGATAGCAGTGTCCCGCCGCACACTGCCACTAATCGGAACGGGAGAGGGGGGAGCCGAGGAGTCAGGAGAGGAGACATTACCGTCTTCCGTGACATCACGTTGATTCATTGAACTTGAAGTGGATGGTGTTCCGAGCTTGAGATCTTGCAT	193	6	5	1	2
00470	TAAAGTACACATTTTATAAATGTACATACGTAGTTTTGTCCGACATCCATCGTGTCCCAGCTGACCAAAATCGTTACTACCGCAAGCATATAATTGTCCATCTTCAGTTACGGCAAGTGTATGATTATTTCCACAAGCCACTAATAGTGAACACGTGAATGAAATATTTAGATTGTTGCTAATGTCTCATACATGATAGATAGTTACCTGA	211	5	3	2	2
00423	TAAATCAGGTAACTATCTATCATGTATGAGACATTAGCAACAATCTAAATATTTCATTCACGTGTTCACTATTAGTGGCTTGTGGAAATAATCATACACTTGCCGTAACTGAAGATGGACAATTATATGCTTGCGGTAGTAACGATTTTGGTCAGCTGGGACACGATGGATGTCGGACAAAACTACGTATGTACATTTATAAAATGTGTA	210	5	3	2	2
0006C	TAAACGCATCAATGATATACTCCGTGCCACGAGGGAAGTAACAAGTGTACCGACCAAATTGCGGTCGAATTTGCGCATCCCCTACCCATTTGACATGTTGACGTTGCACGATCAAGACCGTCAACAGTCGGAAACATTATATAGTAACACTATTAGTATGTATCATGTTGTAAAGTGGGGGAAAAGGGGCCTCAGAACAGTCTCGTGGTAGGAAGTATAGTTAGCCTGACACTGATGTAGTACAAAACAAATT	253	10	6	4	2
002C3	TAATCTGTTTACATATTATTGATACCTAGTATACTCCGGCCCACGAGAGTCCATATGTCAGAACGCGTCCGTCACTGCGCATCGGCACATTGCCGAATAATGGGAATGGCATCATGGTGGGAGAAAACAGACGTCACATATTACTATATGAATGCGCGGTTTACGTATGGACTCTCGTGGGCCGGAGTATA	191	5	2	3	2
000C8	TAATTACTGCACAGAGCAAAACCATCTAGTTACTAGATACCTATCTTGTTGTATGGCGTACGCACTATACGCGATGACGGCTGCCGATAATACGAACGGATCCGTAATTTCAACGACAAAGTGATCACATAGTTACATCACATAATTGCAAACAGTAAAGGTAATCTAGATAATATTTCATTA	183	8	7	1	2
00203	TAAATAATGAAATATTATCTAGATTACCTTTACTGTTTGCAATTATGTGATGTAACTATGTGATCACTTTGTCGTTGAAATTACGGATCCGTTCGTATTATCGGCAGCCGTCATCGCGTATAGTGCGTACGCCATACAACAAGATAGGTATCTAGTAACTAGATGGTTTTGCTCTGTGCAGTAA	184	6	3	3	2
003C1	TAAGTGCCGTGCGGCCACCGGCGTCATTTGTAAATATCAAATGTATTCTTTTGCGATCGCTGGCGGCCACAATTGATCATTACTACCACGCCACATGATCGCCAGCGGCCGTACATGAATAGGATTTTATATTA	134	5	3	2	2
00284	TAATAATATAAAATCCTATTCATGTACGGCCGCTGGCGATCATGTGGCGTGGTAGTAATGATCAATTGTGGCCGCCAGCGATCGCAAAAGAATACATTTGATATTTACAAATGACGCCGGTGGCCGCACGGCA	133	5	4	1	2
002B2	TAACATAGGCGCCCGACGGCCGACGACGGCTGGCGATGACTGACCGCCAATCACAGAGCGCATAGCCATCGCTTGATGGGCAGGTACTGTTCGGCGGCTCAGTCTGCGTGCGCGAAAGCGGTTCACTCTTAGATGGAACAGAGTATAGTAAAGCTAA	157	5	4	1	2
003B2	TAACATAGGCGCCCGACAGCCGACGACGGCTGGCGATGACTGACCGCCAATCACAGAGCGCATAGCCATCGCTTGATGGGCAGGTACTGTTCGGCGGCTCAGTCTGCGTGCGCGAAAGCGGTTCACTCTTAGATGGAACAGAGTATAGTAAAGCTAA	157	5	4	1	2
001A2	TAAGGGGATCACATTACACGTATTTATTTCGTACGTTTTAGACCAATAAGCGGTGGTAAATTACACATACTTCCGAATGTCCGA	84	6	4	2	2
000B3	TAATTTGATATCTATACCCTGGTCCACGAGAGAGTATTACCGTTTTGCGCATGCAGACTGACGGCGGAGACCGTTCCGAGGCCCCATTTCCCCCACTATTTCCACGACCGCTATACATCGTATAGCGTTGAGCGCAGCCGACTGTTACCGAACAGCTATCGGAAATGCCGAGTAGTGGGGAATGCGCGGAATTGGACGAGTTTTAGTCCGGCGACGGTAATACTCTCTCGTGGGCCGGAGTATAATAAGGTTATCTTT	258	8	3	5	2
00102	TAAATAATATTCAGTATTCACGTATGAACAAGTATGGTCGTTGGCATAAACGTGATGGGTTTATTATTATCATATTGTACATATAAATAAATTACGTTATAATAACATAATACGCCAAAAGCGCAATATTTTTGTAGAACATTTTGCCAAACAATTTTGGGTTGCTATATAA	172	7	4	3	2
001B4	TAATACAGTGAGTAAAGCGTTGATTACACTGAGCGAATTTACTCGCTAGTCGTCGGCGAACAAAATTGCACGTGTGTCAGCGTGTCGCGACCAGTCTAATTACATTGAGTAA	112	6	2	4	2
0037C	TAAAATAATTTATTTCTATATTTCTATCTTTGTTTCAGTATAAAACGAGAAATGCGTAAAATAACAAAACCAGACGCTACTTCAGATTTGCTAACTATTGCACAAGCCTATGTATTTTTTGAAAGGTTATTAGTCAAAAGCTTGATCAATAAGGAAAATCGTAAACTATGTGCTGGAGCGTGTATTATTTTGTCTGCAAAGTTGAATGATATGAAGGGCGAA	222	5	5		1
0022A	TAATTATAGCGTATATAAACGTATACGTTTTTGATACGCTAACACATCACCGGCCTGTTGGAATAAACCCTATTGACACGTATACGCGTCAGCGGCGTTGAAAGT	105	6	1	5	2
00374	TAAGATTGAACAGCTCGCTCGACCAAAACATGTTGTTTTCTTGCATTCCGGACACCGTTGAGAGCGTATGCACGGCAGCCAGCACTGTTGCCGACGATCGACCAATCACAGAATGCATAGCAATTGTATAGGGCAGGCACCGGCAACCCGCGGCCCTCGGAACTTTTTGCTGAGGCCCTCCAAATATAATTCATGGT	197	5	3	2	2
0020A	TAAATCTAAAAATAAATATTACATTCAAAATATTTTCAGGCAGCGCGCTACACTGTCGGCACGCCGTTATAGCGTTATTGTCCGATCGTCGTTATCGAAATATAATATTGAACTAGCCATCATTTTTCAATAA	133	6	2	4	2
0016A	TAACAGTTGGGGAAGGAGTGGCCGAGTAGACTACGACGTCGGTTCAAATCCCGTACACAGGCGGCATCACTCTGGGCAGGCCACTGTTTAGATGGCGAGACCACCATCCCCCAACCTGACATGGTAGAAACCTATGGGTGCCCAAATAGAAATTCTGCCAAATAGGCGTCCGAACTTAGGCCTTTGGGCGTACTACCGGAGACATAGCGCCATACGAAAAAAATAAAAAAAAACA	235	6	3	3	2
001FC	TAAAACACGTTTTGTACATGTGTCAAAGATTTGTCGCTAAAAATCCCGGGTGATCACCCATCCGGGTACTAGCAACGCCGGCCTTTACGTACACTCAGTGTGTTTCTGCAGTTGAGTGCACGCACTGCGCCACACCAAGCCACAATTGTATTGTATT	157	6	3	3	2
00165	TAACAATACAATACAATTGTGGCTTGGTGTGGCGCAGTGCGTGCACTCAACTGCAGAAACACACTGAGTGTACGTAAAGGCCGGCGTTGCTAGTACCCGGATGGGTGATCACCCGGGATTTTTAGCGACAAATCTTTGACACATGTACAAAACGT	155	6	3	3	2
0032A	TAAATTCTCAAGAAGATCTGTAGAGCTTTGAGTTGGTGATGGAAGATGATGTGTACTAGTTCTTGGTTGTCTTTGGCTAGACGATGTAACAGTACTAACATTAGAATTTTGACCTCGGCTACTTGAAGTTTTATGACGTGAAAGCGAGTTTTGGGACGTGTTAGGCGATGATACA	175	5	3	2	2
00369	TAATTTTGAAATGTTATATACTCTGTTTGCTGAGAGAACAAGCTGGTTCTGCGCATGTAGACTGACGGCTGCTCGCTCGCCAAGGCTCTATTTCCCCTTCCAAGATTCGCAACGACAATAGGCAACTTATGATTATTAGCCAATGCTAGCGACATCAGTCGGCAGTCACGTCTTGCCGCCGGCAGCTATGGGTGGGTGATGCGAGGGTATGCGCAGAAC	219	5	4	1	2
0008C	TAATGACGGAGGATGGCAACGGACAGAGCGAAATTGCAGCAATTGGCTTATTAGTGAACGAGGAAGAAGTTACCTTGCGCTGGTTTTTTGAAAC	94	9	5	4	2
002DA	TAATGACGGAGGATGGCAACGGACAGAGCGAAATTGCAGCAATTGGCTTATTAGTGAACGAGGAAGAAGTTACCTTGCGCTGGTTTTTTTGAAAC	95	5	2	3	2
00287	TAAGAGGACGTCGCACCCGCATGTGTTGTCTCCGTCTTACAAACGTACGACATAGCAAGTTTTCGTTCGCTAGTTTCAATAGGGTGCTGTCATTTTTGATTTTAGAGTGAATTGACCTATTATCAAACTTTTAGGTAACAACATTATCTGTGCCCTCTCGTTGGTTTTTTACGATA	176	5	3	2	2
00336	TAAAATATCGTAAAAAACTAACGGGAGGGCGTAAATAATGTTGTTACCTAAAAGTTTGATAACAGGTCAATTCACTCTAAAATCAAAAATGACAGCACCCTATTGAAACTAGCGAACGAAAATGTTCTATGTCTTACGTTTGTAAGACGGAGACAACACATGCGGGTACGACATCCT	177	5	3	2	2
0017B	TAATGTCGGGGCCAAACGAATGTGCGGTTGGTGGCTCCGTCTACTTTTGCCGGCGGCTAATGAGAATGTATAATTTTAGGTAACGTTCACACATGAACAGCACACAATTTTCAAATTCGTTTCGAATAAGACAATTTTTTTCTAGCATATTACTACGTGACCGCAGGCTTCCTTTGTGCTATAGGTTCCATTGTATTTGATCTTTATTCAACT	213	6	2	4	2
00111	TAAAAATTATCGAGTGATTCACTCGATAGTTTTCTTTCGGTAGTTGCATACGTCTTACACCGACTAGTTTTGACTATCGATAGTTTTCATTCGGTAGTAAATAGTAATACACGTCTAGTACCAACTAGTTTTGAATATCGA	141	7	3	4	2
0019D	TAAAAATTATCGAATAATTCACTCGATAGTTTTCTTTCGGTAGTTGCATACGTCTTACACCGACTAGTTTTGACTATCGATAGTTTTCATTCGGTAGTAAATAGTAATACACGTCTAGTACCAACTAGTTTTGACTATCGA	141	6	5	1	2
0013A	TAACGAACCTTTGTCGTTGAGTGGAGGATGTGCGAGATTGGAAGAATTTTGTTCGGGACACAGTAGTGTTCTCTCGTGGGCTGGAGTATAATGTAATAACTTGATAATAA	110	7	1	6	2
00195	TAACGATTATACAGTGCTGTTGCAAATAACAACTGCATTGTTTTATAAACACGTACACGTCTGTGGTTGTGTGAGCTGCTTGTATGCAAAACTGGGAGTGGTCGCAAGGACAAGCGGTGTGGTGGAGGAAGTTGTTTTGACTGCGCGACCAGTCATGATCTTACTCCGCAGCGGGTA	177	6	2	4	2
00362	TAACGTCACTGACACTGAGGATGGTGAAATGGATGACCTGCGAAAAGATGGTGACGGAAGCAATGGAATCGACTGTGAAATGGACGATGAGAACGATCATGAAGACGAGGATGAAGATGAGGAAGAGGACTGCAACCAGCTAAGCAACATGCAAGTGAGACAGTTGTACTTGGGCAGTTCGTTAGACGGAACTTCCTTAGATGAGGAAGAACAGCAACAGGAG	223	5		5	1
003F0	TAAACATACTTTTGTAAACTATACTCCTTTTCAAAAGAGAATATACCGGTTAGCGACCAATTTATGTCTTGTGGCGCGCATTTCCCACCAATATCCCATTGTTAGCGTGATCATATGGTTCTCGACGCACCAATTGAATCATTGGGCATGTGCGAAAGCGGTATATTCTCTTTTGAAAATGAGTATAATTGAAA	194	5	5		1
001F1	TAAAAATAACATAAATATTTGTACATAACAACATTATTATAGTTCTAATATTCCATCCTGGTCCAATTCCGATAGATTGTCGGCGGACAACGACACATGAATAGAATCTCCGAGCAAATCAGTTATGTCGTCGTACCTAAACAAA	145	6	5	1	2
000F0	TAAAACAAGTCGTGGATATTATAAGATTGTAACATAAAACTATTTATTTATGTATTTATTTTGACCAAACGGGCTGAGCCCTTTCGATAGACAAACATAATATGTCCACGCACACAATTAGATATAATACCATGTGCCCGTGAACAGGTGGGTTTGATAGTTGGTAGCACGGTAAAATAG	180	7	5	2	2
00030	TAAAGCTATTTTACCGTGCTACCAACTATCAAACCCACCTGTTCACGGGCACATGGTATTATATCTAATTGTGTGCGTGGACATATTATGTTTGTCTATCGAAAGGGCTCAGCCCGTTTGGTCAAAATAAATACATAAATAAATAGTTTTATGTTACAATCTTATAATATCCACGACTT	179	13	7	6	2
00259	TAAAGCTATTTTACCGTGCTACCAACTATCAAACCCACCTGTTCACGGGCACATGGTATTATATCTAATTGTGTGCGTGGACATATTATGTTTGTCTATCGAAAGGGCTCAGCCCGTTTGGTCAAAATAAATACATAAATAAATAGTTTTATGTTACAATCTTATAATATCTACGACTT	179	6	3	3	2
00212	TAATGCCATGGGAAAAACTACCGACAAATTACGAAAAACCGCTAAAAATGGGATTTCTAACGCTTTGTTTATCATCATAGCAACAAATAAAAATTATAATACAGTGTACTCTCGGTAACTCAAACCTTGATAACTCGAAATTCTCGACATCTCGAACAAATAAAATTCCCCTTCAAATAACAATAATACATTGATAACTTGAAATTTTTAGTAAGTCAAATTTTTATTTTTCCTCTTGAACTTCGAGTTACCGAGAGTCGACTAAATTATAATATT	276	6	2	4	2
00021	TAAGAATGCCGCGCACCTTGCGAAACACGGCATCATTAGCGTCCTCTTGGGCGAGTGCATCGCGTCTGATTATCGAGGGAGGTATCCAACGCGGTTGCTGATTGGATTCGGAACGGGCGTCGTCCCTTCCTCCGAAGACACGAGAAGCACCCCCGCGTTCTGCGTAGACGTCCGTCGTGTCTTTACGTGTCACCTGCGGGGACGAATATGTCTCTTCCTCCCTAGAATCCAACGGCAAACTGGATATTTT	250	15	8	7	2
00035	TAAAATATCCAGTTTGCCGTTGGATTCTAGGGAGGAAGAGACATATTCGTCCCCGCAGGTGACACGTAAAGACACGACGGACGTCTACGCAGAACGCGGGGGTGCTTCTCGTGTCTTCGGAGGAAGGGACGACGCCCGTTCCGAATCCAATCAGCAACCGCGTTGGATACCTCCCTCGATAATCAGACGCGATGCACTCGCCCAAGAGGACGCTAATGATGCCGTGTTTCGCAAGGTGCGCGGCATTCTT	250	13	11	2	2
00346	TAAACTATTATCGAATGAGTATAAATGAGAACGTCATAAAAAATTTGGTATGTTACACAATTGTAGTACAGAAACAACACACACATGAGAATAAGGTGTATGAGACTTATGGGAATAAGAGCGTAAATTTGCTGTGTTGTGCACTTCTAAGACGGATTCAAAAAATTATCCGTGTATACTGGGGCCCACCAGAGAGTATCCAGTCGCTCCAACGAAAACACGTCCGATTCCGCGTATTCCCCACTACTCGGCATTGCCG	259	5	5		1
00344	TAAACCTTGGCTATATTCATGTAACCCACTGGTTCCCAACCTATGGTCCGTGGACCACCGGTGGTCCGCGAGACGTCGTGAGGTGGTCCGCGAGCCATACCTACAAAA	108	5	2	3	2
00227	TAAATAATAATATAACTGTAGTCTGTCTCACAAAAGACAGGTACCACATCTCGCTGAAATCTGGTCATTCTTGTGAATCCCCACACCGCACCAAAACTAGTACCACCATAATAATCGGGGCAGCTACAACGACGACGACCGCAGTGATAACAAGTAAACACGAGCGGTGTATATACGATGTAAACGAGAACCAATTGTTCTCAGTCGTGATACATCTAACGTACCGATAGAGCGTGCTTGACGGCCCAGG	250	6	6		1
002E9	TAAATAATAATATAACTGTAGTCTGTCTCACAAAAGACAGGTACCACATCTCGCTGAAATCTGGTCATTCTTGTGAATCCCCACACCGCACCAAAACTAGTACCACCATAATAATCGGGGCAGCTACAACGACGACGACCGCAGTGATAACAAGTAAACACGAGCGGTGTATATACGATGTAAACGAGAACCAATTGTTCTCAGTTGTGATACATCTAACGTACCGATAGAGCGTGCTTGACGG	244	5		5	1
00037	TAAATTATAATCTGTTTCTTGGATGAATATTTAGCATAAAATATAACAGATGACCAATATTATAGTCTGTCTCACAAAAGAAAGGTACACTACTGTTTCACGCATGTAGACTAAGATATGATTCCATCCTGGGCCGTCAAGCACGCTCTATCGGTACGTTAGATGTATCACGACTGAGAACAATTGGTTCTCGTTTACATCGTATATACACCGCTCGTGTTTACTTGTTATCACTGCGGTCG	242	13	13		1
003AB	TAACAACGGTAAAGGCTGTAATTCGACGTCTGAACACGTACGGTATCTAGAAGAAGACGATGAGCCTTGTGAACGCTTCGTTTTGC	86	5	1	4	2
00144	TAAGGTAGCCACACACGGTCCGGTCAGCCTGTCAGTTATGCCTGCACAGGCTGCCGGAGACCGGTCGGCCGTTGCGTTTGTGGGTTCTGGTCGCCTGAACAGTTATATCTGTACAGGCCGCCGGAGAAAATATGAAAACTCGTTCGTCCATCCGGCCGACTGCGGGACTGCGCAGGCGTATCGAAACGTGTATGGGTTCCGGCCGTCCGGCTAAA	215	7	4	3	2
0001F	TAAGTTATACCATGATTTCAGCTTTTCATTATTGATGTTGAGGTTATATATTCAATCATGTTGATTGTTGAATTTTAGATTCGATATGACATTGATCATTGCGCTAGAAAAACAATTTTTATATTATTTATAACATTCATTA	142	15	13	2	2
0001B	TAACGGTAATGAATGTTATAAATAATATAAAAATTGTTTTTCTAGCGCAATGATCAATGTCATATCGAATCTAAAATTCAACAATCAACATGATTGAATATATAACCTCAACATCAATAATGAAAAGCTGAAATCATGGTATAA	144	16	10	6	2
0015D	TAACCCAATTACGCACACGTGTGGCGGTGGAATCCCGTCCCGTTTCTCTAAGAC	54	7	4	3	2
0044B	TAAGTCTTAGAGAAACGGGACGGGATTCCACCGCCACACGTGTGCGTAATT	51	5		5	1
00337	TAACATTATCATCAGACTTTTACGTCCCAATTTGTTCACTAGACCACCCATAAACGGACATCCAAGCATAGCACCAAGTGGCATGCACGACGCAATCCATGAAATGTCGTCATCAGTAATGGGGAATCCATATTGGCCGTGTTCCATCATTGGGCCAGCTGGAGACGTCCAACCAAGTGTTGTGCCCATAATGAACCCGCCAATAGTTACTATGATCACATATAATAATT	230	5	5		1
00275	TAAATACATAAATAGCTCATAAAGAGTCAAAATTGTTTGAACATTCTATCATGTATGGAAATTGGAAAATCCTAATATAAGCATTCATACTCTATTCGCCGAGAGTTGACCCACTCGCTTGATGAAAACTGGTCGCGGCTGCGCAGGCTGGCCTGTCTTTGGAGCGCTAGTGGTGATCGTCGCCAATAGCAGCTGCTTACTTCGACGAGCACTGCCGATCG	221	5	4	1	2
00353	TAAGCCCTTGGCCACCGGCTACGTGTACTCGTTCTTTCAGTTCACAGTCATCCGCGAAGACGACTCTTTCAAGCATTCCACTCTGTTCCCACACTCGTTGGGAGACATAATCGATAGATTTCATGTAGCAGAACTCAACGTCGACCTTACTTCCGGCCTGTGGAGACACAAGTCCTGGGGTTATCCGGCCGTCGACGCCCCATCAGGCGCTGAGATATCTGCTCGTTTCCACAACGACACACAAGACG	248	5	5		1
000DA	TAAAATTGATATTTTGCTTGGACAGTGATTATGCGTGTATCGACACTCGTCGCTACGCTCCTCGGAACCATCGCTCCGCTCCGCAAATTGAAAATATCCCTCGAATTGTTATGCAAAACCAACTCATGTAGGTCATATTGGTCACTAATATATTTTTCTACATTTTCACCAAACAATTTTAGATGATATTATAACAAGAAAAATACCATAA	211	8	6	2	2
0029D	TAAACGATCATCTCCTCGATTAGGTGGACCTCCTCTGAAAACTCCTCCACCAACACCACCGCCACGTCTTCCACCTCTTCCACTTTCAGAATGATTGCGATTGCCTCGATTCATGATATCATTATCTCCTTGATGATTATCACCATGATTATTATCATTACGAAACTCTCCTCTTGGCTGAAA	183	5	5		1
00263	TAAGAGATGTATACTCCGGCCCACGAGAGTCCATATGTCAGAACGCATCCGTCACTGCGCATCGGCACGTTGCCGAATAGTGGGAATGGCATCATGGTGAGAGAAAACAGATGTCACGTATTACTATATGAATGCGCGGTTTACGTATGGACTCTCGTGGGCCGGAGTATAAGCTAGAAAA	181	6	3	3	2
00168	TAAAAGTTTGAAAATTGGTAAATTCTCTCAAATATCAAAACTGAAAGCACTCTGTCAAAACTAGCAAACGGAAATTTGGTATGTCGTCCGTGTATAAGACGGAGACAACATAAGCGGATGCGACGAGGTCTT	132	6	4	2	2
00383	TAACTTTCTAACTATACTCTGTTCCATCTAAGAGTGAACCGCTTACGCGCACGCAGACTGAGACACCAAACAGTGCTTAGCCCCCCATGCGATGGCTATGCGTTCTGTGTCGTCGAGCACCCGT	124	5	2	3	2
002A2	TAAGACACAGTGCTCGCAATGTCTCCGCCAGAAGTGATTTTGGTATAAGAACTTGAATAGTAAGAATTACTATTCACAACATAATCCTAGTGCCATTATAGGCGTGCAAACGGGGTATGCAGTGTATGTGCTAGGATATACTGGGAGTAGACCCACTTTTTAGAGAGCATATAAACTATACTCTATCCCACAAGAGAATATTCACTTTTCACGCATCATAAATAATTCTAATGGTG	236	5		5	1
000BD	TAACTCGACCACGGGTACTAGGCAGCGATGATAGTGTGTGTGTCCGTCGACTATCATTTATGCATATCGGCGTTTTGTTTTGGGTGTGGGCAGAGATGCCCGCGGGACGGAGAGCGCTATCATATAATATTCAATATTATTGTAATCGTTCATTTCGACCGTTACACGTTCTCATCTCTTTTCTTTGGTTATACTTTATATTTATGTTTTAGGATAACAAGGCTTTGACATTTCTT	236	8	6	2	2
001F2	TAAGATACAGTCATCCCTCGTTATCCGCGGTTTTTATCCGCTGTTTCGATTATCCGCGGTCGGGTCCACGATAACAAATTA	81	6	5	1	2
00420	TAATATCAGAACGCTGTTCACCTAAAGTTCGAGAGCCAATACAGAAATTGTGCTCGGAAATCAACACTATGACTGACGCTCTTTGCGAACTAAGACACGATGGAAAAGGTGCTACTGCTCAAGCAGAAAGCTTATCGCGTAGCATTGACGAAAGAATTGGGGAGTTAGTGAAACTAGTAACAAGAGCA	188	5	3	2	2
00403	TAAACTATCGAGTACTTCGATAGTTTTCACTCGGTTGTGCCCATCACTAATCGGGCGGTGACCCATTTGTCCCCATTATCCCGACTGTCCCGA	93	5	2	3	2
00254	TAATTTGTGTCAAATGTAAACTTTATAAAAAGGTAGAAGCAAGAATGAAGAACACTGTAAGCCGTGGAAATTCGGTAAGTAATGAAGTTATTTCAATGACAGTCCGTGGTCCTGGTCTTCAACGAATGGTGCTTGTCGATCTACCAGGCATCATTAGCGTAA	162	6	2	4	2
00322	TAATCAATTGAATTACATATCATTTTGTATCTTATTATTCAAAGTTGTAAAGCCACGTACACACTTGTAACATCATTTTCTGTTACGCCGTAACACCGTTCCACCAGTTGTCGGTAAATTTGGCCGCATCAAAGGATGTTACGCGCAAATGTTACAAGTGTGTACG	166	5	3	2	2
00424	TAAATATAATAACTTTTCAAGATGACACTAAGAGTGATACATTGACAGAACTTTTTGGTTATATTGTATATATTACAGTACCCCAAAATCTTCGTCTGCAGATCGAGCATTCAACGCTAGCCTTCGGACCGACACTTGGAGCAAACACTTCAAATAACAAATGCAGAACCAGGAGGATTTGGGCTCTGGGAGTTGTAA	198	5	2	3	2
0048D	TAAATTGTGTCTACGAGTTATAGAAGCTTATCGGAGTTATCAGATTGACCGTTATCGGACTATGCTTTCGATTCTATCTATATCACTGAAAAGTGAAAATACGTTCTGTGAATGCATTTATCGTTATTATAGCGAATAGCTATTAGTTTGGTTCCAACAATCGTTGAGTGTTGTTGACTTGTTGATAAT	189	5	4	1	2
000A5	TAACTGACTATCGAGTCCGACGACCTCTATCCAACGAGTGGTCCGGGGATCTCGAGATCCCCGGATCTCGACGGTAGGTTATCGACGGTAGGATCTGACGGTAGGCTAAGAGATCCACTATATACTTATGTGGGGCTTATACAA	144	8	6	2	2
00249	TAAAATTGTATAAGCCCCACATAAGTATATAGTGGATCTCTTAGCCTACCGTCAGATCCTACCGTCGATAACCTACCGTCGAGATCCGGGGATCTCGAGATCCCCGGACCACTCGTTGGATAGAGGTCGTCGGACTCGATAGTCA	145	6	3	3	2
000A4	TAAGCCCCACATGGCCACATTACAATTCAACTCAATTTATAATTATAATTATTATACAATAGTCTATTAGTACATATATATTTTATTGGACGCATGTAAAATCCCGGAAAATAATCGAACGGACCGTAAAAATCCGGTAATAAAAATGTACGGACCGTTATATCCAGGACCGTAAAAATCCGGAAAATAAAAATGCGCGGACCATATCCCGGACCGTAAAAATCCGGAAAA	231	8	1	7	2
003F1	TAATATTTTTAGAGACTTATACTCCGACCCACGAGAGTCCATACGTAAACCGCGCATTCATATAGTAATACGTGACGTCTGTTTTCTCCCACCATGATGCCATTCCCACTATTCGGCAACGTGCCGATGCGCAGTGACGGACGCGTTCTGACATATGGACTCTCGTGGGCCGGAGTATAGTATCTAAAAACGATAACAATT	201	5	4	1	2
00074	TAATGTGAACTATAGTAGGTACAGTAGGTAAATAGACTACAACAGATTACTGAACGATAAAGACCATCAGAGTAATGTCAGCAACTACGCATATCTATGCCAGGTCAACGACATAGTCGGACGATAATACAAACGAATGCGGACAATA	148	9	8	1	2
003D1	TAAAGTATACTCCGCGCGGAATAAGAACGTACCCGGGCGGCGGACCAAAACAGGTTTGCCGCGCGCAAGTCGGGCTTATGACTATAACTATATTATGTTTATAACTACGACAAGGTTGCGGGGGAAACCGGTCGCCGCCTGCGCGAGGAGGTACATTCTTATTCTGCGCCGAGTATATATGATAATATTTTATACACAAAATTACATTTTCCAATGCAAAGTTTTCGGAAAAAAA	235	5	3	2	2
002A8	TAATATTGCGCCCGGCACTGCAACCGCTAAAGCGCTGAGATCGACAGAAGCGGTAGCCGCCATTGCCTAAGTTTGTGCATGCGAGGTGCGTCTACGCACACACATGTAATGTCGTAAAATAGTGTGAATAGCGCGTGCGCAGACTCGCCGCCAGAGGCAACTAAAATCAACCGCTCAACAATATTATAAGCATTGGCAGCAGAAAAAAAAAATGGACTTCCACG	224	5	3	2	2
00157	TAACGCGTCCTCCGGGCGCGGTTTTTTTTCAACTCCGCATCGCCGTGCCACTACGCACGGTGATGGTCA	69	7	5	2	2
00358	TAACAACTGAAACTAACGTTCTCGAAAGTCAAATGACGGACTGTTATTGTGACTATCCTCTAGAGGTTTGATAATGTCAAATATGTCCGTTTTTTTAGTTTCAATCTGTTGAAAAATACGACAAACTGCAGGTTCTTCTCGTTTGCTGTCGGTTGCAGCGTGAGATGATATATTATCGAACAAGTTAGACGATGGCGATGGATCCTTGAAGTATT	215	5	4	1	2
00327	TAATCCATTACGGAATAATGAGATAATGTGCCGTATTCATAGTCGATGCTGAGGACATGACAGTCGCATTTATTGTCTCCGTCTTACAAGTACGTAACATAACAAA	106	5	2	3	2
00181	TAAATTTGTTATGTTACGTACTTGTAAGACGGAGACAATAAATGCGACTGTCATGTCCTCAGCATCGACTATGAATACGGCACATTATCTCATTATTCCGTAATGGA	107	6	1	5	2
00199	TAATAATCATCAAATGCCGCCGTCGGATCAACGGGAATGACCTAAAATATATATAAATGCGCGGTAGTACCTAGAACGCATATGACGTGTAGAAACATACGTGGTAGACGACAAGTGTGCGGTAGACCGCATACGACATCAATACCCATCTTTCTACAGGGTTAGGCTTTTATTATTA	178	6	2	4	2
00086	TAATTTTCTAATGATATACATACTCCGTTCAGCGAGAGAACGCGCTGATTCTGCGCATCCCACCGCATCATCATGCTATCGAAACCGGTTCCCTAATGGCAGACAGGGTGTTGCGTGGGAGAACCAGTTTTTGTCGGTACACAGCGCGATATCTCGCTGAACAGAGTATAGGTAATAATGAATAGTCA	188	9	6	3	2
0022E	TAAATGACTATTCATTATTACCTATACTCTGTTCAGCGAGATATCGCGCTGTGTACCGACAAAAACTGGTTCTCCCACGCAACACCCTGTCTGCCATTAGGGAACCGGTTTCGATAGCATGATGATGCGGTGGGATGCGCAGAATCAGCGCGTTCTCTCGCTGAACGGAGTATGTATATCATTAGAAAA	189	6	2	4	2
003E7	TAACACTTTCAACGCCTCTGACGCGTATACGCGTCAACAGAGTTTATTCCGACGGTGACAC	61	5	3	2	2
00264	TAATAAAAGGTTTATCATAATAGTATTTACTATTGTAAGTTGTAACCAAGATTATGTATAACAATATCATTTGACATCTCTTTGAAAACATTCAAATGGGGCCGTTTTTATAATTTTTCAGACGTATAGACGTACTTTTTGATGGTATACATCGTTCCAGCGTATTTCTAAATATTACGGCAGCAAAGATAGCGAGTGATGACGTACCAAATATA	215	6	5	1	2
0044D	TAAATCATACACTTACGTACAAACAGCACGGGGTCTGCGATCTACCGCAGGTAGATTGCCTACCTGATAATATACTGCTGCGAACCAGAATTTTTATTCCGGGCCACGGAAAA	113	5	3	2	2
0042D	TAACTTTTCCGTGGCCCGGAATAAAAATTCTGGTTCGCAGCAGTATATTATCAGGTAGGCAATCTACCTGCGGTAGATCGCAGACCCCGTGCTGTTTGTACGTAAGTGTATGA	113	5	3	2	2
003B8	TAATGAAAAAAGGCTCTGAAGGTTCGGTACAAACGTAATACTCTGTCTCCAATTCTGGACTGCCGCACTCGCGTTCTGTGCGCGCCCATCCGGGCCGGTCGTCGGGTCTCGATGGCTTCATCAGCATATTCTTTGAGACCGACGACGGCTCACACATATACATACAACAATA	172	5	4	1	2
00285	TAACAACTTATCTGTTGTTCATTTATAAATTACATTATAGTGCGTTTCATTGTAACTGCGACTCGACGCTAACGCACCTCGTGGTGTTTTTTCATTAGGGTTTCTAAAACTAGCGCGTAAAGTTGAGCGGCAAA	134	5	3	2	2
0015B	TAATTGATCGAGGTAGACTAATAACTTCGGTTACTAATTCGACTAACCGTTTGTCTTCAACTCTTGTGCACATAACTTTATACAGTGGCGAGCTATGTATATAAGCACACAGTTTCTTGTAGCATTGTATTATTGCGCTAGACGGGTTTTCGGTTATCTGGTGATTCACACACACTGTACATGCGTATCCGTCTAAATAGGGA	203	7	5	2	2
003D5	TAAGAAATGGTGAACAAGACTATGATAACGTACCAAATGACGAAGAATCGGAAAGCCACGATAACAAAAATAAT	74	5	3	2	2
00472	TAAAAAACAAATTTCTGTGTAAGATACGGATATCGGTATAAAACAATCGTTCGAGAAAACACATGTGTGTGGTGTATCGAATATTATCGGCCCAGACTTGCTGTGAACAAAAATATATAGGTATAAAATTACTAGATATAGACATATAGTGATTGTATGA	160	5	2	3	2
0037D	TAATAATAACTTTTTGGTCGAAAAGTGTCTCGCCTATCTTGATATTGTCATTATCTCGACCGACTCGATCGGACAACGGAGAAAAAAACCGATTACGTTATAATCGTTGAATTTCGCGTGAACGACAATATACGGTGAAATAGATTTTATTTTTATAGCAGTATCGTAAATGATCAT	177	5	3	2	2
0039B	TAAATATAGTAGTAAAGTATTACATAAATGCACCGTATAAACGTATATTATAATAATATATACGATCTCATCAGTCTTATCTGGTTCGACTATACACACGGTAGATATATATATATATCTACAGGTGTAGGTATTTTTTTATACGATTATAATATTATTATTTGTTACGCTGCAGCGCGAAAGAACCGCCGACAATGCCGGTGAAGAGAAGAGAGATTGTGAGTGTCGTCGTCATTATTTT	241	5	4	1	2
0036B	TAATTGATTAGCATCGGAACATCGTTTTATGACTGGACAGCTACCGCAAGGCAAAAAACTCACAGCGTTTCGGCTCAATAAAGTCTTAGTGGAACGGTACTCTAATTTTCCTTCGGA	117	5	4	1	2
00435	TAATAGTTCAAAATATCCCGACGGTGGCGGGAATGGCCGGTTTTCACCTGCCGCGGCGGGATGTATGGGTTTATTCAAGACATTTCAATTACTGTGCCTTATCGATATTGTCCCGCGACAAAAATAAATATAAAATACCGTTGTCGCCGGAGTCGGTATCGACTATCGAATAATTTCGCTAATTGCAGTTGTGTTCTACATTTCTATATTGTATAAAATTGTATACCTATTTA	233	5	5		1
001FF	TAAGAAGACGCTACGCATGCGTTTGTTGTCTCCGTCTTACAAGCGTACGACATACTAACTTCACTCACTAGTTTCAATAGTGTGGTGTTTTGATATTATGCGGGATTGTGACGGGGGTAAATCGGGGTGTGCCACGCTACCTTCGTTTGTATATCAAGACAGAAAATCAAACATATTTGATTCCATCACGCTTGCTTGGATCATGTGGCCAAAGTGTGGTTCACTCTTGTAATTCATGCCCCACA	245	6	6		1
0029E	TAAAAATTCGGGAAAATATTATTTCGAAACAACTGTCACTGATGAAGGTCTGTGTCGAGTCGGCTGGTCTACACCGGGAGCCGTTTTAGATTTGGGTACAGATAAATTTGGTTTTGGCTATGGTGGAACTGGCAAAAAGTCAAATAACAAACAGTTTGATTCTTACGGACAGAGTTTTGGTTTACATGATACGATTGGCTGTTGGTTGGATCTAGACAATTGGACTATTGGATTCAGTAAAAACGGTACATATCTTGGCGATGCGTTT	268	5	3	2	2
00458	TAACAAACATAATGCTTACAAACAATATTTTATACACTGTCCAGCATTAGAATTCACCACGTTCCTACAAAAATCAGTTCTTCCACGCACCCCAACGTGATAGTGCCGTAGTGGAAGCGGGTCTCAATGGCAGTTTGTCGAGTTGGGATGCGCAGAGAATCAGTGTGTCTTCTTACTGGATAGAGTATATGTACATTTATCAGTATATTTAGTACCTATTTACACAAAACTT	232	5	4	1	2
003ED	TAATAATTTTTATCTTATCTTACGTATTTTTCAAATTATAATTGATGTATATTATCTGCAAGCGTGGCCACTTGCTTGCTGCGCTGCGCTCGGACAAATTTCCGGAAACTTACCGTTCAAAAGTTATGGCAATTCAAAGTTGCAGTCATTACGCGTGTATCGGCACTCGTTGCTACGCTCCGCTCCGCAAATCAAAAATATCCCCCGACTTGCTATGCAACACTACCTCAAGTAAGTCACAGGGTACATAA	251	5	5		1
002E7	TAATAATTTTTATCTTATCTTACGTATTTTTCAAATTATAATTGATGTATATTATCTGCAAGCGTGGCCACTTGCTTGCTGCGCTGCGCTCGGACAAATTTCCGGAAACTTACCGTTCAAAAGTTATGGCAATTCAAAGTTGCAGTCATTACGCGTGTATCGGCACTCGTTGCTACGCTCCGCTCCGCAAATCAAAAATATCCCCCGACTTGCTATGCAACACTACCTCAAGTAAGTCACAGGGTACA	248	5		5	1
003C4	TAAATCAGTCTGACTAGATTGACATCTAATATCTTTATAAAAAGTTTCAGAAAATCTAGAGGACGCGTATGATTTATCAGTGTCATAATCGTCTTCGTAATAATTGGACCTGATAACATTTGTACGTGTACAAGGTCTAGTGCAAATGACGTTTGGGTACATAATAATGTTGTTTACGGCGGAATGTTTCTGACCTGGATCGTTGACGCTGTACGAGTGCTGGGACGAAGTGATGGAAGTTATGTCCG	248	5		5	1
00432	TAACAAGCGGCCAGCTATGGCTGTTGGACAATCGGGTCAGCAACAACCGACCAAACGTCGCCGCGTGGTTTATACCACTGAACAACTTCAGAATATACATCCGCAACAATCACGAGTAAATTACCAGCAGCAGCAACCACATCCAAGACCTAGACAGCCCCAGCAACAGCAGCAGTCTAGTCATCGATTTAGACAATTGGAACAATTGAATCAGCTTAGCCAATCCCAGCGT	232	5	5		1
00169	TAAGCTTTCGACGTCGATGACGCCTACGTCGGTCATCATTGCTATCACCACCGCGTTCAAGGTGGCGTAACCGACGACGCACTCGGTTCCATCGGAATGACATCCAGGATGCTGGATGAGAAGGCCAGCCTTTGAGTTTAGGCGCTGAAAAAGTAATGACAAACATAA	168	6	2	4	2
0035A	TAAACAACGATTGGTGGTGATGAGCTACTCTCGATACTGCCGATATAGAGCACAATTGCAACGTAAGCGTGAACAGCAGTTGAACCAGGGAAATGCCCCTGTTGTCATAGCTGATGATAAAGAAAAGTTGACGACAACCACATACCGTGGATTAGATTCGATGACCAGAGTTCTATTTTGTCGAGACACATATGATTATCCAGCAGAACTACTGTTAGAGCCTTTT	226	5	2	3	2
002DC	TAACTGTGGCATCAAATGGCGAGGATGATGGAACAGATCCTATGACAAGTAGTAGCAACATCCATGGCGATGCTGTGGCCAGTTCAGATGAAGACGACGGTGTTAGTGGTAGATTTGACGATGATTCGTCATCATTATTGCCACGCCGTCGTACTTTGCCCAGACGCACTCGTCAGCCGTCGGCTAAGAAACTTGAGGCTGCAGAATCATATGCCG	216	5	4	1	2
00331	TAATTCGTTCGTCGGCAAAATTGTAAACATGTCCGATGAGTCGACAGCTGCAGTCGATGCAACGACGGTGCCAGATACGAGTGGCAGTGGAGGCGGTTATCGTCACAAGCACTGGTACTGAACCCGACTACAACAGGAACTGTCTGCACACAATCGCTCAAAGAGTAGAATTCACGTTTAGAAATTGGAA	190	5	4	1	2
001B9	TAATTCCAATTTCTAAACGTGAATTCTACTCTTTGAGCGATTGTGTGCAGACAGTTCCTGTTGTAGTCGGGTTCAGTACCAGTGCTTGTGACGATAACCGCCTCCACTGCCACTCGTATCTGGCACCGTCGTTGCATCGACTGCAGCTGTCGACTCATCGGACATGTTTACAATTTTGCCGACGAACGAA	190	6	5	1	2
00252	TAACACGTTGAATGCCTGTGTCAACCCGTAGTTGACGCGAGTGAACGGGCCACGTGGCACACATATTTGAAATTTCTATCGGACATTCATAACCGTATTGACAACTCCGTAATATCAACTAATTTTACAATTGGCGACAGTCGATCGCA	149	6	5	1	2
001E2	TAAAAGACGACCTTTTTTTTCGTCCGTTTGATTGGCGTTCGGATAATCGGAGTTCTACTGTAGTAAACTAATAACCATACTTC	83	6	3	3	2
00456	TAAGCATGGCAACTATGGCCATTAGCATTTTGTAGGGTGGTTACAGTTGGTTGAGGAACACGTGTATGTAGGGACGAGGCTCCTCGTCACTAAAACCCCGGATCATCATCCATTCAAGAATTAGTGACGTCGGCCGATGCTTGATCTCGGAACACGTTAGTGACTGAGGCCAACCATCGAAATACACTAGGCCCCAAAATAAAACATTATAATATACATACTAATTATAATA	232	5	5		1
001F7	TAATATTTACTAAGTATAATCAGTTTTCTTGTTCATACGAAATATAGTCTCGGCAGTCTTATATTTACTGCCACCAAGTGCAGTTGATCGATCGTACTCAATTATGGTTTTATATTACATTTTTATAAAAATCAATTGTAACGCCACTGTTTCCTAAGTAAATCCGGCGAGTCCGACGATTTCTATTCTGATCATGATGTTCCGTCGCAATACGATGCGACCGATGCGACGAAATACAAACTGTTTTGTTTTTTGTTG	258	6	1	5	2
00178	TAATTAACCCGCAGAAACTTAGGCCATTGGGTGGTGTTTACTGTGGGGGAGAGTACTGTAAGTTTTCAAATACGTGTGTTTAGGTTTGGCATATTTTTTTAGTGGGCACCCGTAGGTATCTGCCATGCCCGGGTGGGGGATGGTGGCACTTCTCTCTGGACACCGTGACTTGTCCGAAGAAAAATGCCACCCGCGGCCGGCATTGAATCGGCACCGGTGTGCGTCACAACCGACG	235	6	1	5	2
000DB	TAACTCATTTAGAGTCTTGTCGATATTACTACCTTGTGGGACGATATTCCTCCAGCGTATGTTGCGCAACAGACCGCCAATTTGATGGCTGTTAGCAATCATGCTGCGCAAATAGGCCACCTGTCGACGGCTGCTAGCCCACTTTTCCTCACGTTCCCTCAACTCCCGTTTCACACCCTTGATCTCA	187	8	6	2	2
000D0	TAAATTTTCACATATCCATAATTGTCTTGTCCCAATTGCCTACTTGAGGTGGCTTCGCGTAACAAGTCGGGGGATATTTTCGATTTGCGGAGCGGGCGCCGAGAAGCGTAGCAACGAGTGCCGATACACGCGTAGTCACTGCCAAGGGATATTGTGATATCAAGCTGTGATACCTACTGTGTATATTTT	189	8	4	4	2
00339	TAAAACCAAAATATACACAGTAGGTATCACAGCTTGATATCACAATATCCCTTGGCAGTGACTACGCGTGTATCGGCACTCGTTGCTACGCTTCTCGGCGCCCGCTCCGCAAATCGAAAATATCCCCCGACTTGTTACGCGAAGCCACCTCAAGTAGGCAATTGGGACAAGACAATTATGGATATGTGAAAA	192	5	4	1	2
004AE	TAATTTTATTTATGTTATCCAAATAATAAAAACGCTACGACACAGCTAAAATTGTTCCGCATGCGTTGTGGAATTTCAGTAATTCTACTATAAATACGGAGGGACTGGTTCTATACTGCGCAAAACAGTTTTTTTGCAATGTTGTACATTTGTAAGACGGAGAGAACGCATGCTGCGTCCT	181	5	4	1	2
002B4	TAAGATTTCGGACTGGAATGATGGGTTGACTCTGGAACTTTGACTGAAGGTGCTTTATTGAGGGTCTTATTTTTTTTGGCGCTATTTTGAAAACTGGGCATCCCCTGAAGTTTGCCGTATGGTCCTTGAGCAAAGTGCACACTTGACAGGACTTTTTGGGTCCTAGGTGCACTCGTTGGTATGATGTTCCGCACCACATTTTACGCAGCAGGAAGCGTGGTTGCAATAGTTTTGCGTATGGCCAAACGCTTGGCATTTA	259	5	5		1
00489	TAATAATTTGTTATCGTGGACCCAACCACGGATAATCGAAACCGCGTATAAAAAAAAGCGGATAACGAGGGATTACTGTATCTACATACAGGCTAGGTACATCTATAAAAAATATTAGATAAAGTAATCGAAAAGCTAATCATTATCTTTACTTCAACCAAAAAACCCATTCGACCACAAAATATTTCCACTATA	195	5	2	3	2
002C6	TAAATGTGGATAATAAGTTTGATACTTATATAATACATACTAGATAGAGCAATGTGTATATCACCCGTAATCTGCGCTTGAAGCTGATTTTTTCGGCCCATTCGACCCCGATGAAATTATTGCGCATAAGTGAGAAATGAAAAAGATAGCGCTGTAACATAATTGCAGTTGTGTTTCGCGCATGTGTAGTAGTGACATCGGGGCCA	206	5	4	1	2
00428	TAAAGTTCAAAGAAGATAATTTCCTATCTTAGAAACAGTACAAAAGAAGTAAGTATATGAATATATGATATTATACTCCATTCGGAATGAGATCGTACCTCAGCGGCCAACTTCTGCGCATGGGCGTGGCTTCGTTCCACAGCGTTAGCCCCACGATCTTTCTAGATGGGGGAAGCGTCTCGCCATATGTCTAACCGCCGCCCGACGAAAACTGGTTGCCGCCGAGGTACGATCTCATCCGAATAGAGTA	250	5		5	1
00389	TAAATATAATCTAAATAAAATTCCAATTGAAGGAAATATTTTTATTATTAGTCAAGGAGATGTTGATTTTGGAAATGGAAATCCTTATATTTCTAAACTATTACATTCACCAACTTGGTTAGAACTTTGTCATATAGCCAATGATCAAATTATTGCAACAAGTGATTATAATCACTATTATCTAGACAATA	191	5	3	2	2
002D1	TAAGTATATATACTCCGGCCCACGAGAGTCCATATGTCAGAACGCGTCCGTCACTGCGCATCGGCACGTTGCCGAATAATGGGAATGGCATCATGGTGGGAGAAAACAGACGTCACGTATTACTATATGAATAGTTTACGTATGGACTATCGTGGGCCGGAGTATAGTATTAGTATATATCTCATGATCTAA	192	5	4	1	2
00452	TAAAACCGGTCTTGCTTACATTGGCGAAGGATGACTAGTGAATATAATTTGCGGTCGTGGTGGCGCCCAATCACTAGTGCCTCGCAAACGAGAAGAAGCCTCCGGACGATCATCGGCGTGATCATGCGGGTTGACGGGCCAGCTCGACGGTAAAGGCAAAATCTGCAATGTTCAAACACA	180	5	1	4	2
00050	TAATTTATTTGAGTAAATATTAGTGATGGGCAACGATATTATAATTGTGAGTATCGATAATGTTCCGATTTTTCAGATATTGAATCGCGATATCGTAAGCAATCGTAAGTCATAACGATATCATTATTGTATCAAAAATA	140	11	9	2	2
0013E	TAAAAATATTTTTGATACAATAATGATATCGTTATGACTTACGATTGCTTACGATATCGCGATTCAATATCTGAAAAATCGGAACATTATCGATACTCACAATTATAATATCGTTGCCCATCACTAATATTTACTCAAATAAA	143	7	5	2	2
00384	TAACGGGATTCTTTACGTAATAGCGCTGCTGGCCCCCGACCTGGGATCATTCACTGACGCGGATAGATGAAGAAGCCCGAGTAGGCTTTTTAGTTGCAACGGCCGAGCCCATGATCCGACTTACACTACCTGGCCTAAAGAAGTTTCACTTCAATAATTGTTTGTTTACCAAAAAATTGGACTTTGCTTAGAACCTTTTTTTATTGTGTATAGTGATTTATTA	223	5	4	1	2
0028E	TAAATTTTTATGATCGTTTGAAATTCAAATTTTTACAACATTGGATATTCACTCGATTTCTCATGTAGCGATTTCCTTATTTTGTTCTAATTCAAAAACGAATAACTGCAGATACATGAAATTTTTATTGAATGTTTATATAAGCATTTCCTATACACCATACAATTTTGAAAATATTTTGACTCTTTTTGAGCTGTTTACGGACATTTTCA	212	5	3	2	2
0028C	TAAGCATAAGAAATCTCAAGTCCGCGTTATGCTAGAACGGCACAACATCGAAGGTCGATGGTGTGATGTACGTATACCAAATAGTAAAGATAAACATGTAAATAAAGTTCCGCGTAAAGTATTTATAGGTCAAGTGTCTGAAGACGTGGATGAAGATGCA	160	5	3	2	2
00412	TAAATCAATGCTATAGGGAAGCCCCTTAAAGCATAGAAACTGTTTAGAAGAATTCAAACCTGCTTTCAAAATTTAAATCGGAACATCCTAATGAGCGTAGTGATTGAAGTCTCTGGCAGTATTTTTTGGAAAAAAAATGTTTGTTATTTTATAAAGTAACATTTGGTGACTTGTGCATGTGCATAGATAAAATTACAGACGTACATATCCGGTCACAATGATGCCCCTATAATACAACATGGGTACTATGAATTAC	256	5		5	1
00067	TAAGAACTAAGCAGTTGTCACACAATTATACTATACTGAGTGCGCCGAGAGAGCGCAAGTCGGCCGCGCATCCAAATGAAGTCGCTCCGCGGTATCGAGGTCTAATTTCTCCCACCAAGTCGACTGGTCGTACACCGTCGTAAACCACCGAGCGCTATCGTCTGTTATCGAATTTTGTCATTTGACAGTTCATATCTA	198	10	6	4	2
0008A	TAATAGATATGAACTGTCAAATGACAAAATTCGATAACAGACGATAGCGCTCGGTGGTTTACGACGGTGTACGACCAGTCGACTTGGTGGGAGAAATTAGACCTCGATACCGCGGAGCGACTTCATTTGGATGCGCGGCCGACTTGCGCTCTCTCGGCGCACTCAGTATAGTATAATTGTGTGACAACTGCTTAGTT	197	9	6	3	2
0031F	TAATCTCGTCGTCGCCACCCGAGATCTATGTTTAGCCGTAAATGATTATTAGTGTGTGTGGCGTCCATGCGGGTCAATTGTAGCGGTATGGAGGGCTCTCGCACACACTCGTCAGTATGTAATATTGTGATCATGAAAAAACGTTTATTTTTCACTCAAACCTACGATTCTAATTCCAACAATACGTCGCAACGAATACCTCGACTTGCATTCTGACAAAATATTCTTTTTTTCCACAATATGTACGAGGGA	252	5	5		1
001EF	TAAAGTACATAATGTAAACTCCTCTAGATGGCGGGTCGGTCTTGTTGGCGCGGGACCCTCCCCCTCATGCTATCGTAGAGAGAGTACGGCCGAGCGGCGGTCGTTGTCAGTTGTCGAGTCCGTCGAGAGGCTAACGTGCAGCCTTTTGTGCGCGTCCGTATTATTCGATTGTGATGAATGAAT	183	6	1	5	2
001AC	TAACATTCATTCATCACAATCGAATAATACGGACGCGCACAAAAGGCTGCACGTTAGCCTCTCGACGGACTCGACAACTGACAACGACCGCCGCTCGGCCGTACTCTCTCTACGATAGCATGAGGGGGAGGGTCCCGCGCCAACAAGACCGACCCGCCATCTAGAGGAGTTTACATTATGTA	182	6	3	3	2
00444	TAAATAAAATACACAACCAAATCGTTGCGTCCATGGAATATTGTTTTTGTAGAATAGTCTGGTTGTTACATAGATCCCTACAATACCTTTGCCGTGATCGATGAACGCAGAGTCGTGTCAAAAAATAGTCTTGTGCGAATTGCAGCTCTCGCTCGTCACTTTCCGCCCTTGCCACACAATATACTA	186	5	2	3	2
00237	TAATACGGACATAATATTATAGATAAAATAAGGTTTTTATGTAAAACGTAAATATACGTCCATACTCCCTGAGGCGCGTTTCAACAAAACGTATATATACGTCCATACTCGTCAAA	116	6	3	3	2
00394	TAATCGAACACAATTGGGGGAGAATATAAATAATACGTTTCAGTGACCTGCATGAGTTTGTGTTCCACTTCCGGTTCGGTTTTGGTACGCAAGAAATCGGGTACAATGTCGTGGGACAGGGCTGGCACTCGATTTTCAGTGATGCGAGCGAGATCTTCATCGCGCTCTGGGTTCAACATCAGTGGCAGAACACTGTAGTTACGCAACTGCGGAAGTTTCTCGTAAGAAAGATACTTCATGATGG	244	5	2	3	2
002AE	TAACTCCAAAGTTATACCAAGTATGTCACTGAACTCCTAAACGGCTGGACTAATTGTGAATGCCAAGTCTGTTGACCAATATTTCCTCCTCATCCACGAAGACGTGGCATTGTTTTATGTATGTAACTTATATGTAAGTATAATACGCTCAATAATTACGTAATTGCGATACATATAATATCAAAACACAGCGTACAAAAAAA	203	5	4	1	2
00471	TAAATGTTCTTTACGTGTAAAAGTACGATTACAGAATTCACAGGCATGTGGAGACTCGCCCGTATGAATACGAATATGACAAGTAAGGTGTTCTTTACGCGTGAAGGTTTTAGGACAAAAGTGACATCGGTGTGGTGACTCACCCGTATGTTGGCGGATGTGATTGGTCAGATGCTCCTTTCTCGTAAACA	191	5	3	2	2
001B1	TAACCCGACGGCGACGACGTCTTCGCTTACCAGACGGATTAGCGTTGACGCCATCGCCACT	61	6	3	3	2
00473	TAAATTTTTTTTTCCCCCAACCATCGAATAGGCCCATTGCGCCTCCCGTCTCAACCGTTCCGGACGATAGCAACGATGGCTGCGTTCAGCCCGAAAAGAACGTTAGCGATTATTGTGTTGTTGGTGTTGTGCGACGGATTGGTCGTGTCGGCATCGTACGGCGGTTCGTTTGTAAGTTTGGTGGAAGTCGTCAACCACACAAAGTTCACCCAGGATGAAACCAAAGATTTGTACGTCAATTTGACAGTTGGCATGTTTGGACAAGGACTCAATG	274	5	5		1
000F6	TAAATATTGATAATGATAAATAGCTATAGGTACGTATCAAAAAAAGTTGAAAAGCAGTAGAACTGCGATTTATAATTATTAA	82	7		7	1
0036F	TAATTTTTGATCATGATTGAATTGCAATTTATGCATAAACAGTGTTTGCACGAATGGAAAAATTCGGTAAAATATTTTGGAAAGATGAAAAAAATATACGGACGCCAGGCAAATTCATTATCTCTCAACAACCCAAGGTGATACTGCAGGGTCATATAGGAGGATCAAGCACTATTTCTCACAACTCATAGGCAGCTGGTTATCAAGGATTTATCTCTTGACATCGACAATAAGGAAAT	239	5	5		1
002AC	TAAACTAACGGAGCTACACGTGTTCTGATGAGCGTACAATTTGCTACGTTACGCACTTGTAAGACTGAGATAACATATTATGCGGATGAGGCGTCCTC	98	5	3	2	2
003DD	TAATTGTAAATGAGCTTACTTACGGTACTGTACCGTCACCTTGCGAGTAACCATAAATTCGACGGCAGAGGATCGGTTTGTACAGTGTCA	90	5	2	3	2
0018B	TAAAAAATGACATTTTATAGTTGCTGACGAAGCGTTACAGCAGCGCTGAATTATCGAAGGCACGGTAATACATCTGTAAGTCATAACAGTGATCTACTCAATGATAAGGTACACTCAAAAACTAATAAGCAACAAAGGAA	140	6	2	4	2
002D9	TAATATGCACTAGTGACGATCACGGGTCGGCGGCGGCCTGACGGGCCCCGACACCAACGCCGACCCGTGATCGGCAGCGGCAGTGAACGT	90	5	3	2	2
00391	TAATATGCACTAGTGACGATCACGGGTCGGCGGCGGCCTGACGGGCCCCAATACCAACGCCGACCTGTGATCGGCAGCGGCGGTGAACGT	90	5	5		1
00196	TAACACGTTCACTGCCGCTGCCGATCACGGGTCGGCGTTGGTGTCGGGGCCCGTCAGGCCGCCGCCGACCCGTGATCGTCACTAGTGCATA	91	6	4	2	2
00221	TAACACGTTCACCGCCGCTGCCGATCACAGGTCGGCGTTGGTATTGGGGCCCGTCAGGCCGCCGCCGACCCGTGATCGTCACTAGTGCATA	91	6	3	3	2
00207	TAAATCAGTTCTCGGGGCACCCGTTTTCTCGAGCGTAACTTAGGCAGTTCAAATGACCGTTCACAGCGGCATTCCTTCGCGTGTCCTTGTCCCAGGGGCAGCCGTTTTCCCGTGCATACACAAGGCAGTCGATATGA	137	6	4	2	2
00100	TAATCGGACATGTTTGTTGATTTCGTATAATATAAAAATGAATCGCAGAATGTGTTGCTAAGGGCAATAATTCTACTGTACGTGTGTTGTGACTAAACTCTTCCTAAATGGTTAGACCGATTTGAATGAATTTTTTGTATGCGTTTGCGTTTATTCATCTGATTTTAGTACGGTTAGGTTAGGTTAGGATTTTGTA	196	7	6	1	2
00163	TAACCATGACATTTGCGTTCACTTTGTAGGTGGTGCGTTCGTGAGCGTCCAGGACACAGCAAGCCCATTCGGATACAAGAGGGGAGAAGGTATTGATGCTGGCAAGGGCGAAACTGGTTGGGTGGTGGCCAAGGAACGGCAGAAGTATGACGCAATATTCAACACGCTGGAGAAGTCTGACGGAAAACTTTCGGGAGCCGGTATGAAATTATGTATCGTATATTATATAGCTAGGGCTGTGAATTT	246	6	4	2	2
00129	TAAGGATGTCATACTCACATGTCTTACAAACATAGAACATTCTATAATTAGAATTAGGCTTCTTCAACGATATATTTTTGAATATCGATATCGTTTTGAATTGTGCGATATCGAAAAAAAAATGTAGGTACAGTAATCCCTCGTTATCCGCGAAGGTTACGTTCCAGCAAACCTGCGCGGATAACGAAAACCGTGGATAACAAGACCAGTAGTTATCATAGACCCATAAGTACATATATGTATGTATAATGTA	253	7		7	1
0008D	TAAGATTGAACCGGTTTCGCGCACATAGACTGAGCCACCGAAAAGTGCTGTGATTGGCTGTCAGTCATTTTCGGTGCTGGCCGCCATGCATACGCTCCCACTGGTGTCCGGAATGCGCGAAAAAAACGTGTTTTGGTCGAGCGAGCGGTTCAAT	154	9	4	5	2
000FD	TAATATGTTGAATGCGGTTGAATGGGAATACATTTTTCTTGAAAAAACTCCTATACCTTTTATTCAGTACCTAGGTAGATATAATATTTTTTATTTTTGTACCAATAATATAAAATTTTACCTATCTACTATATTCCGGCCCACGAGAGAGTATTACCGTCGCCCGACGAAAACTTGTCCGATTCCGCGCATTCCCCACTACTCGGCATTGCCGATAGCTGTTCGGCAACGGTCGGCTACGCTCAATGCTATAAAGTGTATAGCGGTTGTGGAAA	275	7		7	1
003FC	TAATTTGTATTTCAATACAACTGATCTATAAGTAAATATTTCTTATAGCCTTGAATAAATACATTCATTATTGTAAATAATATGTATTGTTATGTTCAAAATATAGTAATAGTTTATTTTATAAATCACAGCTATACTCTGTTCAAAATTAGATATGTACCGGGCGGCGACCAGTTTTTGTTCCGGGACGTTCAGACGGCTTTCCCACTATGGTGGTCCGTATATTTGCGTCGTTTGACGAAGCCACGCCCATGTGCACAACTTGG	266	5	5		1
0008E	TAAAATAATTTGACTCTTTTTGAGCTGTTTACGGACATTGTAAGTTTTCAATTTTTTTAGTTTTTTTTTCTATAAATATCAATAAAGTTTTATCTGTTGGGCCAAAAAGTGTATAAA	117	9	5	4	2
0029A	TAAACAATACATACAATAAACGTTTGGGAATAATGGAAAAAACATAGCATTTAGCTCTCAGCAATATTGGCACAACTCAATTTTACATTAGATATTTTTATTCTAGAATCGAAATTGAGAGAGTTCTACTCGGACTACTTTATACATTGACCGCATGTGGCGACCGGTGGTCGCATAAAAATAATTATGTTTCGATGA	198	5	3	2	2
00482	TAACATACTTATTATTGGTTGAAGATTTATGACGACGATATCCTGAAGAACTAGATGAACCAGAGGACGAACTTGAATATCGTTTACGGTTTTTATTTGATTTTCGGTGTTGTTTATGAGTTCTTCTATCAGATATTGATTTGGAACGAGATCGCTCGTGACTAATCAATACAAAACACGAGCTATAATATAATACAATATTGCTTGAACACAATA	216	5	2	3	2
00350	TAATGCCGTTTAGTTGTCGCTTTGGCGCAGTGGATTGTCATTCACCGTGTGTTTGCATATGATGCGTTTGTGAAAAACAATGAATTGGTA	90	5	4	1	2
001F5	TAAAACTGAGGATATAGGTATAGTCCGGCCCACGAGAGTCCATACGTAAACCGCGCATTGATACTGACGGTCGCGACAGCTGCCGGCCAAATTTTCTCCCACCATAGTGCTGTTCCCACCACTCGGCAACGTGAATACAGCGGGTTATAAAAACACGACTAACGACGGCTGTCGGCGATCGTTGCCGGCCGGTTTCCGATCGGTAGATTCAGCGTATGGAAGGGGAACCGATGCGCAGCGACGGACGCGTTCTGACATA	259	6	6		1
000F5	TAACACGTTCAATGCCATTGTCAACGGGTATTCGACATTGGTAACGTAGCTCAGGTCACCTTTGTCGACCGTACGTAATTTTGGCGCGGCGACGCGGGCTCTGCACCGAAAACACTAGCGGACCTCAACGTGTAAACCATTTCTTCCAAACAAAAAGTATAATAACTACCTATT	174	7	5	2	2
00197	TAAAAATATGTCAGGGTACCATATTTTGTCTTCTGTCTCTGAACAACGAGCAACACGCAGACGTGCGTACAGTAGATCCAGTTTTGTAACGTTAGTC	97	6	4	2	2
00310	TAAGACTAACGTTACAAAACTGGATCTACTGTACGCACGTCTGCGTGTTGCTCGTTGTTCAGAGACAGAAGCAAAATATGGTACCCTGACAA	92	5	3	2	2
0043E	TAAATTCCGCTCAAAACAATTACTCTGCACTAGAATTAGAAATGGCCGCACTGTATTTCGGATGTACACACTTTCGGCAGTATCTCCATGGTAGACATTTTATTGTATGGACTGACCATAAAAA	124	5	1	4	2
00499	TAACCAAGTGCAACATCCACGCGCTGAACGGCACGTTCGCTACGTTCGATCATCCGCCGCCCATCTATTTGACCGAGTACCGCGAGCTCACCGTCAAGCTGCACGAGCTAGAGGCCAAAGAGCAGGAGCTACTCGACCAGGTCGACCATCCCAGGGAACACCGAAAAACCCGGGGTGACAAGCCGTCCACGCCGTTCGTTCGCACTATCCGTGCTTATTTACCTAACAAACAGCGTACCACTATCGAGGTGAAG	254	5	2	3	2
004A7	TAAAAAACATAATACATGGTGGACAGATGAAAGACACCCATAGAACAGATACATACTCGCGT	62	5	5		1
004B4	TAAATGAGAGAGTGGGGACAGAGTGGCAAAGCGGAATAAGGCGTCGGTTACGACGCATACCGTTCCTGGTGTGAACCTCGGTCTTGGGCGTCACTTCATTCGGGGAGTCACGGTGTCTGGAGAGAGAGGCCCCCATCCCCCATTTGCACATGGCGGATGCCTACAAGTGCCCACTTGAAAATTCTGCCTAACTAAATCTACTGTACTCTCCCCTAAAGTTCAAAATCACCCAATTTGACCCGGGTTCAAGTCAAAACTGACTACT	265	5	5		1
003B1	TAATAGAGAAAACTAGTACATATGAACGGGGCACGTATTATGTGTTTGATGCGCTCACGTGGCGCAAAGTGCCCAAGGAATTTCTGTTGGAGTACAGCAAGTTGGAAGGTCGACCTACTGTACCAAATGTGCCGCTCACCACCCCTAATCTACTCTGACACAACGAGCACCGTCGGGGCGTAGACGCACTGCCAACAGCGACCGAACCTGACGTACACCAGCCCACGACGGTCGTTCTCAATGCAG	246	5	3	2	2
00225	TAACAACAGGCGCAACAGTGGCTACCGCGGCAGCAAGCAAATGTTTACACCACAACACCAACAACTGTCGCCTAATCGGGCGTCAATCAACATGCAGTCGCCACAAGCCAGTAACTTATCGAGAGGTATATTTCAGAGAGGCGGGTTTGCGACCAACCCCGGAGCAGACAGGCGAAATCATATGCCGGGTATCGCATCACTCATGCAAGAATGGTTTGTCACAAATCCTAG	231	6		6	1
002EA	TAAATAAATAGGTATACAATTGTATACAATATAGAAACGTAGAACACAACTGCAATTAGCGAAATTGTTCGATAGTCGATAACGACTCCGGCGACAACGGTATTTTATATTTATTTTTTCCGCGGGACAATATCGATAAAGTAATCAGTAATACAGTAATCGAAATGTCTTGAATAACCCCACACATCCCGCCGCGGCGGGTGGAAACCGGCCATTCCCGTCGCCGTCGGGATATTTTGAACTA	244	5	4	1	2
001E1	TAACAAAAATAAAAACCAATTATATTGTTAGCTTCTTGAAACAGTACCTGATCGCCTACAATATATTTCAAACGTTATCTCATCGCCATCAAAATTATGATTCATGAAAGCGAATTTATATTTGTCGACGGGTAGTCAACACTGGCGACCCGCGAAATATTACTGATGTCGACTACCCGTCGACCGTGGCATTGAACGTGTTGAAATGGAAATGTACTTATATTACAAAGTATAAACTCGTTCCGTTTGGGTATTTTAGTCTC	263	6	3	3	2
000D9	TAAATAAATAGGTATACAATTTTATACAATATAGAAACGTAGAACACAACTGCAATTAGCGAAATTGTTCGATAGTTGATACCGACTCCGGCGACAACGATATTTTATATTTATTTTTGTCACAGGACAATATCGAAAAGGCACAGTAATCGAAATGACAAAATGTCTTGAATAAACCCATACATCCTGCCGTGGCGGGTGAAAACCGGCCGTTCACGCCGCCGTCGGGATATTTTGAACTA	242	8	5	3	2
00108	TAATACTGTATACTCTATTCAGAATAAGAATTCCCACTTTCGCGCACGCAACTGAACCGCTGGCAGCTGTCAGACCCCCCTGGCGAGTGTCGGCTACGCTGTGATTGATCGCCGGTTGTCGACGGCTGCCGTCACCAGTCGCTATCATATACGTATACACCTGCAAAAATCAGCGCCAACTGGTGGCAACTAACATGCACGAACAAAACGAGTTTTAGTCAAGCGAGTGGGAATTCTTA	239	7	7		1
0034F	TAATTATATTCTATTCAGAATAAGAATTCCCACTCGCTTGACTAAAACTCGTTTTGTTCGTGCATGTTAGTTGCCACCAGTTGGCGCTGATTTTTGCAGGTGTATACGTATATGATAGCGACTGGTGACGGCAGCCGTCGACAACCGGCGATCAATCACAGCGTAGCCGACACTCGCCAGGGGGGTCTGACAGCTGCCAGCGGTTCAGTTGCGTGCGCGAAAGTGGGAATTCTTATT	237	5	2	3	2
000E2	TAAGAGGATGTCGTACCCGCATGTGTTGTCTCCGTCTTACAAATGTACGACATAGCAAATTTTCGTTCGCTAATTTCAATAGGGTGCTGTCATTTTTGATTTTACGATGAATTGACCTATTATCAAACTTTTAGGTTACAACATTATCTGTGCCCTCTCGTTGGTTTTTTACGATA	176	7	2	5	2
00191	TAAGTTATCTAGTTGATAAATTTGGCACTGTTATGGTTAGTGAACTAGGAACCATGTGTTTGTTTCGTTATGGTGACTCCGCAACAGAAAGCGTTTTGCGTCCTACGTTTCAATAAATGCGAGTCGGTAATAAACGTTCAACGTGATTTTTGAAGAACTTATGGAACTGAACCTCCAACTGCTCAAAGCATTTGATGTTGGCACCAAACGTTCCAAGAAAGTGGTTGTCTGTGTGCACAGAAACACTCAGTTCAACCTCGTAACT	265	6	6		1
003A4	TAAGTTATCTAGTTGATAAATTTGGCACTGTTATGGTTAGTGAACTAGGAACCATGTGTTTGTTTCGTTATGGTGACTCCGCAACAGAAAGCGTTTTGCGTCCTACGTTTCAATAAATGCGAGTCGGTAATAAACGTTCAACGTGATTTTTGAAGAACTTATGGAACTGAACCTCCAACTGCTCAAAGCATTTGATGTTGGCACCAAACGTTCCAAGAAAGTGGTTGTCTGTGTGCACAGAAACACTCAGTTCAACCTCGT	261	5		5	1
00449	TAAGGGAGTGTAACTCCGCAACCGCTCACGCTGAGAGTCAGGAGAGCGATAGACTATTTAGACATGCCGTACCAGCTTCGTTACATAGGACAGCCTGAACTAGGTAAAATTCATGTGCATTGTGAACCTATAGA	134	5	1	4	2
0024E	TAAACGTCTATAGGTTCACAATGCACATGAATTTTACCTAGTTCAGGCTGTCCTATGTAACGAAGCTGGTACGGCATGTCTAAATAGTCTATCGCTCTCCTGACTCTCAGCGTGAGCGGTTGCGGAGTTACACT	134	6	1	5	2
0041C	TAATACGTTCCAAACACCAGATCCTCAACGAGGAATTGGTATGATGCCGAAACGTGGTTGTGACGTATCCATTTGTGAAATATCAAAGTTTTATC	95	5	1	4	2
003A2	TAACCTAATTACGCGCACCTGTGGCGGTGCAATTCCGTCCCATTTCTCCAATAC	54	5	3	2	2
00126	TAAAGCTGGAGCGGGATGTGTCGCAGCCAGTGGCCATTGCCGTTGAACAGAAAAAAGTGATAGTTAGACAACGGCATGAACGTGGCACTGGTCGTGGTCGTCCCGGGCCAATCAAAAAAATCAGACGTTCTACAACTCATCATGAGGACATGAAAAAATTCTTTTCCTCCTCGTCCGAAGACGAGAACGCTGCTCAACGACACGTCAATAGCAGCGATCAGTGGCCTGAGTTGGAGGAAAGTAACAAA	248	7	7		1
004A0	TAAATTATCGCTGTGGCTAGAGTCACGGACACCGTGAATATAATGCGTTCACGGACATTCGATGCGCGCATGCGCAAATACTATATTTTGTTATCATGTCCGGGTATCTACTGAGTATCCGGACACTGATAAAATTATTATCATATTATCATTA	154	5	3	2	2
00297	TAAAGAAATAATCTTACTTTATGCATGTCTTGTCAATAAACGAAGTGACCTCATTTTCTCGCATTTCATACGCAACATTGCGAACTTTTTCTAAAAGGGACTCTCGTTTGTTC	113	5	1	4	2
00323	TAATGATTTACCATAATCTATACCATGACAAATTAGATAGGTATCATCATAGTATTTTGATACGCATCCTCCGCTCTTTACTTTGCCTTTATCGTAGTTCTCCACCACTTATTGGCTGTCAATCGTATACATACATATATCACATGGAACAAAATCAACCAATGAGAAGTTGAGAACTACGGAGGTGGAGGAGATTTGTATCTACTGCGCAAAATTAGTACAACTGTGATAAT	233	5		5	1
00278	TAATATGTATTTCCAGAACTATTTATTGCCATACTTGGACATGTTTGGATCGGACACGAATAAATCTGCAAGATGCAAGATCGTGTTGGAAGCGTATCGGGCGCGAGGTGAGAACGTCGCATCCAGCGACCCCGTGATCAACGACTGTCTGATGTACATGTGCAAGATCTTACACGATTCCGTCGAGTACGTAGTTCATGATCAACGCCAAACATATCCTATATA	225	5		5	1
002FF	TAACCGGACAGACTTCGCTGTTGAACGGATGTCTCGGACAAGGTATGGATC	51	5		5	1
00243	TAAATTATTATTGTCTTCTTATTGCACAACATGCCTACTAAAAGCTTATTTTTCTATTTTGACTGAAGTATACACTATATACTCCGTTCCACGAAAGAGTGCGACCGCCACGCGCATCAAAATGAATTAGAGCTGACGTCACGAGACCAAATTTCCCCCACCATGGGGCGTCCACTATCTGTTTACAGTGGCTCAAGTAACGCACCACAAATA	213	6	6		1
00081	TAATACAATGATCATCTTCCTTATACCTGCCCCATAACCATAATTTGTGGAAAGAAGGCTCTATACGTTGCTAAAACATCTGAATCATCCATATAAATACTAGCAACGTTTGGTGCGGTCTAACAATCTCTTTGAAGAGGACTCTACGCAGACATTTGTTGTCTCCGTCTCATAAGTATGTAACGTCGCAAATTTTACCCTCGGCAGATCACATTTAGCTCCGCTAATTT	230	9	5	4	2
00150	TAATTTTTAGGGTTCCGTACGGTAAAATGGGACCCTATTACTAAGGCTCCGCTGTCTGTTCGTCCGTCCGTACGTCCTGCTGCCATCAAGCTGTATCTCATGAAACATGAAAGTTAGAAAGTTGAAATTTTCACAGATTATTTATTTCTGTTGCCGCTATAACAAGAAATACTATAAATTCTAGAATATATTATATAAGCAGTTTTGCCAATATGTTTATAGCTGATGATGGTACGGAACCCTTCGTGCACGAGTCCG	258	7	3	4	2
00194	TAAACGCGTGTCAGACGCAAACTAAACATCGGATCTAGTTGAGCCGCCTCTCGTTGGAAAGGGTACGACCAAAACTATACAACACTGTTACCAAATTTTGAAAAATGTATTTATTTATGGCTCTAGAAGCATGGAGACCTTACTTTTGGGACACGCCTTGTATGAACCAGTGTAATATTTCCTTCTGCCTATACATATGTTGTTACCATGTATATAAGTACATGAATTATGAAATAATTTTGTTTTCATAGTTTCATGGGTACA	264	6	6		1
0033A	TAAATGATGAAATGTATAGGTATATATCAGTAGAACGACCATTTATCCTGTAAAAAGCCCAGCCCGCCCAAAGATCGCTGTTTTCTGGTAGATCTTACCTTCCATCGCAGCGAGCATATCGAGGTGCCGAAATATATAACGGGAACACACTTTTTGGCGATAAATACATAA	171	5	3	2	2
00155	TAAGAAAAATAGTTTTTATACTCTGTTCCACTAGTGAACATGTCGTCCAATAATGAGAATAGGTTAGCTCTGCGCATCCCTCGCCCAATTCTCGATAGGCGGCGTTTGATTATATTATGACCGCTCAGCGTTGATAGCAACCGATTACAATTGTATTGTGCACTGCGATCTGCGATCACCAGGGACATTTGGCCGCATGGAGGGTGGGTAAGACGGCGTAGTCGGTC	227	7	4	3	2
002A3	TAACTAAATAATCTTTATTGTATACTCCGCGCGGAATAAGAACGTACCCGGGCGGCGGACCAAAACAGGTTTGCCGCGCGCAAGTCGGGCTATGACTATAACTATATTATGTTTATAACTATGACAAGGTTGCGGGGGGAACCGGTCGCCGCCTGCGCGACGAGGTACATTCTTATTCCGCGCCGAGTATAGAAATAAATCCCA	204	5	2	3	2
0034B	TAACTTTTCTTGCCTTTATTGCTGCAAAGTCATCTATAACATCTATGTATGGATAGGTATCTAGGTATGAATACTGAATAGTGAATACAAAATACGTCAACGCATATAGCATATAATAATATACATATTGCATGTCTAGGTATGGTCGGAGGGGCAGTGATATAAATAAATACCCTAGCGTAGTTTCCAATATTATGCGAATTCGCGACGAGAAACGTATTGCGATAACGTT	232	5	2	3	2
00407	TAAAGGTAAACAAACCCGTTACAAACCTCTTCGTGATTGTTTATACTTTGTTATGGTTTTTGCTACTGTTCCCGTTGTTGTTATTGTTGATGTGTCGTGACTCATGCAAGGTATTCATTTTGCTTATTTCCAGTTGTCAAAAGTGCTATCAACAAATTTGGTAACAATTATTTACCATGTTCACGGTGGGCGTGAACGGAAGTGGCGGTTCGAATCCACAGAGCGTACAGTCGAATCCACAGAGTGTAGAGTCGAATCT	259	5		5	1
0014D	TAATTGAAAACTGTCTATACTCTTCCACGAGAGAGTGCGACCTCTACACGCATCGAAATGAATTAGCTTCAACGTCGCGAGGCCAAATTTCCTCCACCATGTGGCGTCCGCTCTCTGTATACAGCAGCTCTAGTAACGCACCACAAATA	149	7	5	2	2
0043C	TAAGTTATATACCTGAGGTACGGACGGGAATATGTTATCAACAAGTCGTTTATAGCGAGGGCGCATACGAGATAAGCAACCTAGTAAAATAAAACATGAAACCATATATTATACTCATCAATTATTATAAATCTAA	136	5	3	2	2
00375	TAACACATTCAACGTCTCCACGCGTCTATATTTTGTAAATTAGTCAATACTGTAATAAATGCCCGTAAATAGCCGCTCTAACAAAGTAAATACAAGACAGGTTACTGTTT	110	5	3	2	2
0032F	TAAAACACTGGCCGCCGACCCTTCTCCCACTCACTTACGGTCGCCGGTCGCCACGTACTGAGTGTGGGTATTTACGGCGGAAACTAAGTGATAGAGTGGGAGAAATTTGGGTACGGAACCGCGGAGCTCGGTCATTTGGATGCGCGAATGAGTAGCGCTCTTAGACTGGCCCGAGTATAATAAATCATGTGTAAAAATAAGCAACTTGAATGCTCTTCATTATTCATTTGTAAATATGTAGGTATCTATTACATT	255	5	5		1
00059	TAAAAACGAAAATATCCCCCGATTTGCTATGCAACACCTCCCCAAGTAGGTCACGGGGTATGTTATGTTGTATAGTATGTGCAGTGATAACAAGTTTTGCGGCACTCGTCGCTGCGCTTATAGTAGTGTTGCGCACATGCGTATAAACGTAAAATCGCAAACTTTGGAAGGCTGTAACTTCCAAAATAATCATTTCCGCAAA	202	10	6	4	2
00072	TAAATTTATACATAGATTCGGTTGGAACGATCTATGCATACGAGAGACCGAAATACCAGGACAATTAGAGATTTCATTGATGATTTGATTGAAGACCATTCGGAAGACCGTATAATAACGTTTCTACGTAGAGCAGGCCATAGGATAGATGGATATATAACCCAGCAAATTGGTCCTTATCCAGGTAATTCACAATTTA	199	9	6	3	2
00329	TAACGATGATACGCGGGTATACGGCCGTAATGCCGTATAGCCCCATATACCTATTAGAATTTTTAGTGATAAAAAGAGAAACAAGAGAGAAAAAAAGGCTTGTGGAAAATACTTTGGA	118	5	2	3	2
0030F	TAAACTAACGGGAAATAAACGTGTTCTTCTGAGCGTAAAATTTGCTATGTTACGCACTAGTAAGACAGAGACAACAAATGTCATTATAACGTCCCC	96	5	3	2	2
0033B	TAAAAATGTTCATCCAAAAACTTTTGATTTCGACTATTCTAATGCTGCGTTCACACGAGACGTGAATCACGAGAGTGAACCACGCCACGCCACCTTCGTTCGTATTTCACGACTGAAAATCAAACATGTTTGATTCTATCACGCTTAGGTCGTGGGGCCAAAAGCGTGGTTCACTCTCGTGATTCACGTCTTGTGTGAACGCAGCATAAGGTATAAACATTTTGTTGTTTTTCA	234	5	5		1
003AC	TAAGGCCACCCACACATTTATTTCCACCTAGCCGACCACCGCACGATCTCTCCCCGTTTACATCGCCTCATCATCATCATCATCCGGGATTGCCTCCAGGCTATCCGCCTATGGGTAA	118	5	5		1
00438	TAATTTTTTTTATATATTATACTTGATTCGGAATAAGATCATACACCTTTGTTCCATGGCAGAGCCCAACGCGTCGCTGTAGCGGGGACAGCGCCTGATCATATCTCTGACCACAGCCCAACGAAAACTGGTCGCCGCCGAGGTACGATCTAATTCCGAATAGAGTATAGGATCCATGAAGTCACAGGTTAGGTTTATTTTATATGTCGACGTCTCCAACATCGTAACTCATTCTTACTGCATTT	245	5	3	2	2
003D6	TAAGTACGCTGAAAACTATGGTGAAGTCCGAATTTGGCGCCTGGACTTAGTTTTGAAGTTATGGCCTCATGAAGTTCACTATTTCGGAGCGTATCGACGAGTGCCAATACACTCGTAATCACTGCAACTTTGAACTTCCATAACTTTTGAATGATAAGTTTTGGGGAAATTTTTCAAACAGTTTAGAATTCAGCATAAAAAAACCACATA	210	5	2	3	2
001A4	TAAATACCAGTTGTACACCACTCAGAGTGATGTGTGGTCGTTTGGTGTGCTTCTCTGGGAAATCATGATGTTGGGAGGGTCTCCATACCCGACGATAAGTTCGTCCATGATATACGAAGAATTGCGCAGAGGTTACCGTATGCCTAGGCCCACTTTGTGCTGTTACAGTTTGTATGAAGTCATGCTTTCGTGCTGGCATGCGAACCCAGCCAACCGGCCGAAGTTTGGTACGATAAAAGATACGA	245	6	6		1
000B7	TAACATAGGCAACTGCCTCGTCGAGTGTCGATGTCGAACCTCTAGCGGTGGCGTGCGCGCTGGTCGCAGGA	71	8	2	6	2
004B1	TAACGTGACTGTACACACACACACCGTATACGCACTGTACGACGGTGGCCGTGCAAGTAATTCTTACATGCTTCAAAGGCCCTATATATATGCACAACCGAGGTCATGTTACATCCGTATAGAGAGTGAGTCTTACGCTCGTATAACTAGATACTAAATTGTACACACGTGTCAAGGCTGACTACTAATA	190	5	5		1
002D7	TAATCTGATACTATACTCTATTCAAAAAAAGAAGGTGACCAGGCGGCGACGCATCAGGCACCGCCACGGAACAAAGCCACGCCCAAGCGCACAACTCAGCCGCCAAGTCACGGTCTTATTTTGAATAGAGTATAATAATGTAATTTGTCAGCA	153	5	3	2	2
00317	TAAATGAACTACGCACATCATCGTCAATTTTCTCTGCTAGTGATAGACCATTCACATCAGGCGTAGTTGTTGCTTCAATACAACGATGGCTTGCTTGCCGCAACAGTACTAGCCGAGTGACATGTAATTCATTTTGAAGTGCTGCTTCTCTCGT	154	5	3	2	2
00332	TAAAAAGGTATAAATTATGGTTCTGCGGATAAATCTCGCATGAACCGGGTACAATCTCCTGTCAGCAATCAGCTTGCACGTTGGTTTTCTCCAGAACTGTTGGCACAAGCCCGTGCTGGCCGTTTGCCAAACATGCCTGCTATGTCGCAGAATATCAACATGCTCAGTGTCGAGGATATCGAAAAATTCCAAGTTGGTGGTCGCT	205	5	3	2	2
00296	TAACGTATTATTTGCTATGTTACGCACTTGTAAGACGGAGACAACACGTAACGCAGATATCACGTCCTC	69	5	2	3	2
003C2	TAACATGTCATCTTCAGTGGACCGGAAACTCGATACCGACAGACTCTCGGTGAGGTGAGCGGTACAATGACCGTCATCGACGAACTGCCGAACGACTCA	99	5	4	1	2
00462	TAAGGTTCTCGCACACTGCAACGGTGGCGGTAAGTTTCTATTGGCTTAGTGGTGCTGTTGCGGTAAATTGTGTACGGCTGCATTTTACCTTTTTCGCTACCGCCGCAGTGTGTGCAGGGCTTTATATTTATATATGCTGAAAA	143	5	2	3	2
0004D	TAACGTCGATAACGGAGAGATTAGTCACATAGACGAGCGGTACGACGAAATCATTTCATAACGTTTGTAGTGTTTGTACAGTTACATGTCTAAGTTTGCAGTGCCTTTATTATAAATATTATTCTTTACCTA	132	11	5	6	2
0002E	TAAAGCTCGCGGGCGCGATAATCGGCAAAGCCGGCGCTAGAATCCGTCGTATACGCCAAGATTCGGGAGCCGGAATCACTATTGGCGAACCAACTGAAGGCTCAGATGAACGAATAATCACTATAAATGGCACAGACAGTCAAATTCAAATGGCACAATATTTATTACAACAATGGTTAGTATTTTATATTTTTATTTTTAT	202	14	7	7	2
0027F	TAAGATAAAAATAAAAATATAAAATACTAACCATTGTTGTAATAAATATTGTGCCATTTGAATTTGACTGTCTGTGCCATTTATAGTGATTATTCGTTCATCTGAGCCTTCAGTTGGTTCGCCAATAGTGATTCCGGCTCCCGAATCTTGGCGTATACGACGGATTCTAGCGCCGGCTTTGCCGATTATCGCGCCCGCGAG	201	5	2	3	2
000AA	TAAACCAATAATTGAACCATTGAGTACACATGCAAAACAAAATGAAATATGTAACACACAGTCAACTGTACTAGAAAATAAATCAGAAACCTCATGCACTAGTGAAGATGATGATGATAACGAA	124	8	3	5	2
0021F	TAATTTCTGTTATCAAAATGTATTTCTGTCATACTTTAGAGAAAGACCAACCAACGCAGTTGTTGTATGGAACAATAAGCCTTTAGTGGAATTAGTCCGTTCATTCTCTCAGTACCAGGAACCCAAATCGACTGTCGTGATAACCGAGATCACTGATGAAGAAGAAAACGAAA	173	6	6		1
003B7	TAAAAAGACACAATGGTTTTATACATTTTTAGGTGCAGTGACATGACAGAGAGATCAAAGTCTGTGTCGGGCAATCGCATACGTATCGGCATGCTAAAGCACAAATTTCTCATGGACGCAGGGCGTACGTTGCCGAACGTTTGATTCCTTCCATACGTTCTCTTCGACCAGTA	173	5	2	3	2
00273	TAAAATGAGGGTGGAGATGACTTATGAACGGTATCCAAGAGCAATTGTAAACCAGCGCGTTCTTCGCGTAAATCATTCAATTGTTTTTGTAACTCTTGATAGACTAGACGTAAATGAGCATTCCTTTCTTCTAATCTAATGTGTATGAAAAATATATTATTATTTTTATTTA	172	5	4	1	2
00418	TAATTTTTTCGTAAGGTACGCTAAAATTGATGTAGTTGCTTCAGCTCCGATAGTACCTTTCCGAGAAACTGTTGTGGTTCCGCCTAAAGTGGACATGGCTCATGAAATTGTTGAAAACCAGAATCAAGTAATTATTATCATAATATTATACAGTTGAACCTTTGAAAATTATGTTATAAACTATAAACAGATTA	194	5	4	1	2
000C3	TAACTTATCCAACTAAGCCACGTATAGGACTAAAACCTCAGACGTGCCATCGATTTCAGTCCTGTGCTTATCGTAGCAATCAGTGGCGGTATCGAGGTCGTTGCGATAGCATTCAGTTTAGTGTTGATCGCCGTGTGTTCATAGTAGGTTTCGGCTTGTATGGTTCGTCAACTGGAGCTTCCGATTACACT	191	8	3	5	2
00290	TAACAGTGTAATCGGAAGCTCCAGTTGACGAACCATACAAGCCGAAACCTACTATGAACACACGGCGATCAACACTAAACTGAATGCTATCGCAACGACCTCGATACCGCCACTGATTGCTACGATAAGCACAGGACTGAAATCGATGGCACGTCTGAGGTTTTAGTCCTATACGTGGCTTAGTTGGATAA	191	5	3	2	2
00288	TAACGCAAAGAGAGTATGGTCACGCTCTATTGCCCGGTGAAGGTGCAGCTATGGCAGCTTATGTACAAGATGGTAAACGTATTCCTCGGCGTGGTGAAATTGGTTTGACATGTGATGAAATATCATCTTACGAGTCAGTCGGATATGTGATGAGTGGAAGTCGGCATAGACGCATGGAAGCTGTGCGTATTCGTAAAGAAAATCAAATTTATTCTGCTGATG	222	5	5		1
00053	TAAATCTAGTCTGTCCAGCGAGAGAACGCGCCGCACGTCTACCAAAATTGGTCCGTTTTCGCGCATTCCCGCGCGTACCCAGCCATGTGTGCACCCACCAGGATGGCCCACCGACCGACGGCGCGTTCCGACGACCGGCTGTACGGACCGATCGGCCGTCTTCGGCAGGCCGAGAGAGGGGGAAATTGGGCCTCGGCGCTCGCTCGGTCGTCAGTCTACATGCGCAGAAACGGCGCGTTCTCTTGCTGGACAG	253	11	8	3	2
00477	TAACCAATTTCATTATTCTCTCTTCAGTAAACGATAAGATACAGCGGTACTTTTCTGTTATCCCTACTACCGCTCGATGTCGAGACTACCGCGACTTCTCAATTCTGTTATCTCGACTACCACGCCGGTGTCGCGATTACCGGACCTGTCCGGACTCCGGACTACAGTTCGCTCGATTGCCGTCGTTGCTGACAGTTGTATTA	203	5	1	4	2
00085	TAACTTATAACTAAGATTTTCTGTCTAACTCGAGTCCGTACTCCGACTGCCGACACGTCCTCGTCCGTGGGAACCGTATGGGTCCTTGCACGGCGAATTCGCTGACCAACGCACTTCCCACAGTCACGTAGGCCATTGCGTTATCCAGCGAACGCACATATCGCATACAGGGTGTCTAGTATGTACAGGGTACAACAGTATCTACGGTCA	210	9	3	6	2
001A3	TAATAATTATCGACAGGAATTAGTTTCGTTCAATCGTGCCGATTCGTATTGAAATTTGAGTCCTATACGGGTCAATACGTATCACTTGTATATCGTACGTGTAACTTCGTAAACACTCAAAATTGACTCGATATGTATCGATACACTCCAATATTTTTT	159	6		6	1
001C2	TAATTCTTGAACGAACGGTTTCGATCGCCTTTTTCGTTCGAACAGAACGAGAGCGACCACTTCTAACCCGATCAACAAAATCACCAGTATTACGATAACGTCCTGTGGTACGATAAACAAAACGTTCACTCATTTCAAGCGGTCGCAAGAGACTGAAAATTTGTGGCGTCGATTTACCTGA	181	6	3	3	2
00448	TAAACAGAAGCTTCGCAATATACAATGGCAGTGTGCAAGATCAATTTGAGCAGAACAAATATTCGGGGGGTTCGCACACCATGGCACTATAATACGCATATATACCACCGGGTTGCAAGGAGCA	124	5	5		1
002C2	TAATATGCTTATGTTTGAATTCTTAGTCGGCTCAAAGAAGAATCCGTTCGATGGTTGCATCTGGAGCAAATCCAGTGCCACGTCCACAACAACGCAACAGCAGACCCACAGAAACACCACAACAGTGAGTCGATGACAGTTACCATTAGTTCCTGGCAAATATATCTCCTCCACCGA	177	5	3	2	2
001C5	TAACATCCAATCCCCGTCCAAGGAAATGGAATCTACCGAAGGAAACGTCCAATCCACCGTTATCAGAACTGAGCCAACGAAGGATCCATCCGGGTCGGAACTGAGCAATAGGGTGAAGAAGAGACAGCATTATAGAGATCTACGGCAGATAATAAGAGCGCAAAGAAGAACTCAGAAAAAAACCCAGGCAGACATACCTTCAA	203	6	2	4	2
002D6	TAATGTAGAGTCTTATTTACCTGTTTTTATTATCATTAGATGAACAAGCGTTGTTGAAAGGGTGTCAATTGTTTGGTTATGTATTCCATACCCGTACTCCTAGAGCGGTCACGGTTTCAGCATTGGGCATCAACGAGGAATATGAAGTTTTGACTGTCATAGAGTTTACCAGCGCTAGAAAGCGAATGTCCGTCATTGTGCGTGCGCCGGACAAAAAGATTTATCTCTATTGTAAAGTAAGTTTATGGATTACTTC	256	5	5		1
001A0	TAAGATGTAATCAAAAGTTTATGTTTTGCAAGGACCATGGTAGGTATACATTTTAGTTTCTGGTTGTGCAGGGGATACGCGCCCGGCGGCTGGCACTTTTGGGGATTTCTTCTTTTCCGCCCGGCACTTGGGAATTTCCTCTTTTCCGCCTGGCACTTTTGGGGATTTCCTCTTTTCCGCCCACTGGACGGAAAAAGGTTGCTTTCGAACGCTTCAACCGTGGTCGAAAACCAAACTTTCGGTGCAGGCGTGACAAAAATATTTTATTATACTATGATTT	280	6	2	4	2
003E8	TAAATCATAGTATAATAAAATATTTTTGTCACGCCTGCACCGAAAGTTTGGTTTTCGACCACGGTTGAAGCGTTCGAAAGCAACCTTTTTCCGTCCAGTGGGCGGAAAAGAGGAAATCCCCAAAAGTGCCAGGCGGAAAAGAGGAAATTCCCAAGTGCCGGGCGGAAAAGAAGAAATCCCCAAAAGTGCCAGCCGCCGGGCGCGTATCCCCTGCACAACCAGAAACTAAAATGTATACCTACCATGGTCCTTGCAAAACATAAACTTTTGATTACATCTT	280	5	3	2	2
00159	TAATATTATAAAGTATATTCTATACTGCCGCCACCGAGAGAGCGCTACTCGTTAGCGCATCCAAATGACCGAGCTCCGCATTCTCGTACCCAAAGTTCTCCCACTCTACTATATAGTTATAGCAACAACGGTGGCGGCTGCAGTGACGGTAGCAGCGACCAGCGTATGGGCAGATTTAGTGGAAATGCGCGAGATCGGCCGAGTTTTGGTCGCCACCCAGTAGCGGTCTCTTGGTGGC	238	7	7		1
003EA	TAAAAGTGTATACATTTATACTGTTGCCACCAAGAGACCGCTACTGGGTGGCGACCAAAACTCGGCCGATCTCGCGCATTTCCACTAAATCTGCCCATACGCTGGTCGCTGCTACCGTCACTGCAGCCGCCACCGTTGTTGCTATAACTATATAGTAGAGTGGGAGAACTTTGGGTACGAGAATGCGGAGCTCGGTCATTTGGATGCGCTAACGAGTAGCGCTCTCTCGGTGGCGGCAGTA	241	5	5		1
00258	TAAATCTAAGTCACCTATGTCAGATTATTGACCCAAGTGTTGATCCAAATACACTACATAGTTGTGTACTTGTGTACAGTGGCGAGCTGAAGCGCTCAATTTTGACGCAATTGCGTAAACTTTTCGAAGGGGTTGGTGACACCCCTTGACTGTGGTGCAGAATTACAT	168	6	1	5	2
00218	TAAATTGTGCTCTGTGCTCCTGGTTCCTTTATATAAGCCTATAACATCTCTACCGTTCATCTTAGAAATGTTTTGAAAATGTATCTTAGAAATTCAGTATTTGTAAGTACATAATTTTTGCTTGGTCTTAGACGCCATTCGACGGTCTGAGTGTCGCGTCGACAACAACTGCAAGGCATGGCCAAAGACGTCATGCGGCAAGGATCCGGTAGACGGTCAACGTCGGTGTCTGTGTGCAGATCAAACG	247	6	6		1
00062	TAAATAACTAATCTGTCCAACGAGAAAGCACAACTAGGTGGCGATCTAAACTCGTTGTCCGTGCATCTCCCATCCCCAGGCCCACATAGTGCTGACTACCAGCTGTTGATCTGTAAACGAGCACGCTCCGCCTCCGCGCAATAAGCTATGACGCACGACATGTGACAGCAGCGACCGCATAGTGAGGGAAA	191	10	4	6	2
0023C	TAAGTAATAAATAAAAACTTACAAACAGTTATAAGACCCAAAAGCCGACGATGTGTTTGAAAATCACCCCAATCATTATTACCAACTGGATACTCTTTGATATATCTTGCTTGAACACATCGTTCTGTACCGGTACCATCTACTACACGTAATTGATTTATCCGACATATACGTTCAAAAAGA	183	6	6		1
003B4	TAACCGTCTTTTTGAACGTATATGTCGGATAAATCAATTACGTGTAGTAGATGGTACCGGTACAGAACGATGTGTTCAAGCAAGATATATCAAAGAGTATCCAGTTGGTAATAATGATTGGGGTGATTTTCAAACACATCGTCGGCTTTTGGGTCTTATAACTGTTTGTAAGTTTTTATTTATTA	185	5	2	3	2
0011E	TAACGAATATGGGTGGAGGCAAAATTGTTTTCGGTGTGTTGTTAGTGGTATTTGGTCGCTCCTCGTTTTGATTATCTGATGTGATGTTAGTGTTCTCGACGGAAGGCTCGTCTACATGGAGAAAGCTGTATCTGTTTTGCGTGACAAACGTTTTTGATTTCTTGGTACTCGCTGTATACGACGGTGATAGCGGTGGTGAGGACAATGCAGATAAGTTACGTTTATTTTTATATTCATTATTTTTGCTGACTATTTGGTTA	260	7	7		1
001B7	TAAATATATGAATGTCGTTTACGTTCACGTTCTATATAAAAAAACAAGCGACGTTCACGTATTGTACACTAATTATAAACGTGAACGAGTGAACGGACGTTCATGAACGACGTTCTTTCCAAACACTGAAAAAAACATACAGTAAATTA	149	6	1	5	2
00454	TAAACCGGCTTCACGCATGCAGACTGAGCCGCCGAACAGTGCCTGACCCCCTATGCGATGGCTATGCGTTCTGTGATTGGCCGTCGTCGATCATCGGCGCTACGCTCCTACCAATGTCCGAAATAAACGTGCTTGGGTCGAGCCGTCGGTTCACAAT	157	5	3	2	2
001D3	TAAGATTGTGAACCGACGGCTCGACCCAAGCACGTTTTTTTCGCGCATTTCGGACATTGGTAGGAGCGTAGCGCCGATGATCGACGACGGCCAATCACAGAACGCATAGCCATCGCATAGGGGGTCAGGCACTGTTCGGCGGCTCAGTCTGCATGCGTGAAG	162	6	1	5	2
000C7	TAAGTGTTCACCCGTAGGTATCTGCCACGGCGGTGGGGGATGGCTGCCTTTCTCTCCGGACACCATGACTGCCCGAAGAAAAATGCCACCTGTAGCCGGGATCGAACCAGCGTCGGTGCCCGTCAAAACCGACGCCTTAGTCCGCTCGGCCACTCCGTCCCCCGCAGTTTTA	172	8	5	3	2
002DE	TAAAATATCGTAAAAAACCAACGAGAGGGCATAGATTTTTTTTTCATTCACTCTAAAATCAAAAATGACAGCACCCTATTGAAACTAGCAAACGAAAATTTGCTATGTCGTACGTTTGTAAGACGGAGACAACACATGCGGGTACCGCATGGACGT	156	5	1	4	2
0002C	TAAGAAGCCCGGTGGTTCTTGGAATACATATCGTCGGGTAGAGAATTTTCCTGGTTTTCCGAATATCTAT	70	14	10	4	2
00038	TAAGAAGCCCGGTGGTTCTTGGAATACATATCGTCGGGTAGAGAATTTTTCTGGCTTTCCGAATATCTAT	70	13	10	3	2
0003F	TAAGAAGCCCGGTGGTTCTTGGAATACATATCGTCGGGTAGAGAATTTTCCTGGCTTTCCGAATATCTAT	70	12	10	2	2
0006F	TAACATAGATATTCGGAAAGCCAGAAAAATTCTCTACCCGACGATATGTATTCCAAGAACCACCGGGCTTC	71	9	5	4	2
0004B	TAACATAGATATTCGGAAAACCAGGAAAATTCTCTACCCGACGATATGTATTCCAAGAACCACCGGGCTTC	71	11	7	4	2
0013D	TAACATAGATATTCGGAAAGCCAGGAAAATTCTCTACCCGACGATATGTATTCCAAGAACCACCGGGCTTC	71	7	2	5	2
0024C	TAAAAAGCCCGGTGGTTCTTGGAATTTATATTATCGGGTAGACAATTTTCCTGGCTTTCCGAATATATAT	70	6	3	3	2
00023	TAAAAACCAAGCGCGGGTATACGTTATGCGGAATGCGCTCATTGGTCACCTGGGTCTTTCGCGCGCTAAGTACGATTAC	79	15	8	7	2
000CE	TAAAAACCAAGCGCGGGTATACTTTATGCGGAATGCGCTCATTGGTCACCTGGGTCTTTCGCGCGCTAAGTACGATTAC	79	8	6	2	2
0000E	TAAGTAATCGTACTTAGCGCGCGAAAGACCCAGGTGACCAATGAGCGCATTCCGCATAACGTATACCCGCGCTT	74	22	17	5	2
00036	TAAGTAATCGTACTTAGCGCGCGAAAGACCCAGGTGACCAATGAGCGCATTCCGCATAAAGTATACCCGCGCTT	74	13	9	4	2
00182	TAAATTTGAATTCAATGATTTGTTATCATTGTATAAGAAATACGATTCTGAGGGAAGACGGTCAACCTATGATATTACTAAGTATATTTGATGATATTATTGTGAATAAAGTGACTTATACTCTGTTCTTCGAGAGAAAAAGCTGCGGCCCGACGAAAATCGGTTTGTTCTGCGCATCTACTCGCATCACCCACCCATAACTGCCGACAGGAGTCGCTAGCATCGGCGTCGGTCGCCACGAAT	243	6	6		1
00417	TAACGTTAGTCACGCCAGTGTATATTACGTCATTAGTTGCATCGTGGTTTCTTCGACTGCGTTAA	65	5	3	2	2
0005C	TAAATTTATACACTTTTTGGCCCAACAGATAAAACTTTATTGATATTTATAGAAAAAAAAACTAAAAAATTGAAAACTTACAATGTCCGTAAACAGCTCAAAAAGAGTCAAATTA	115	10	5	5	2
0010B	TAAATTTGAATTCAATGATATAATATCATTGTATAGAAAAACGATTCTGA	50	7	4	3	2
0007A	TAACCGGAGGATGTTTACGTGAAGATTCTTTAGGAAAACCACATACAGCGTAAAGGAATGAAGGCTCACGTTTCTTATTTACGTGTTCAGAATTTGAAGGTGCCAAATTAGTGAAGCCATTCCATAGAGCACGGGAAATCAGTCTACCAGTAGTAACTATTTGCTGCATTATTTA	175	9	2	7	2
00491	TAACGCCGAGGTGGTCCACCACTACGTCCTCGACTTCCACCACCGCGAGGTCCTCCGCGACCTCCTCGTCCTCTTGGACCTCCACGTCCACGACCTCCTCTTCCGGCTCCTAAAACAACAAGACAATAAATAAATAATCTTACATATA	148	5	5		1
0018C	TAAATTTTCAACAAAAGAAGCGGCAACAACCGCTATTGAAGCGGTACACAATACAGAAATAAACGGACACCCC	73	6	3	3	2
001D9	TAATACTTTATTCAAATCAAATACATACTGGAACCCCTTGATTTAGAAGTCTTTCCACCCTAGTAGACGGACTAAGTTCTGGATGCCAATGAGTGTTTCCTCGGAGATGACACCCTGAAGCACGACCACTATCTAAACTTGCCGTTGAGTGACGAGATCCTGAACCAGAACCAGATGAACCAGGACTATCACGACCAGGACTTTGGGTCATATCAATTCCTTGATCTTCCTGAAGTGACAATTGATGG	248	6		6	1
001D7	TAATTCATTATCTATACTCCGGCCTATGAGAGTCCATATGTCAGAACGCGTCCGTCACCGCGCATCGGCACGTTACCGAATAGTGGGAAAGGCATCATGTTGGGAGAAAACAGACGTTACGTATTACTATATGAATGCGCGGTTTACGTATGGACTCTCGTGGGCCATAGTATACATAATTTTATTTACCCCTATAAAATTGTTATACCCAGGACCAGCTCAAGAAAAAATAGTACATTAGGCAAACTCAAATTTTTCCG	260	6	4	2	2
001BD	TAATATAAAAATGCCAAAAGTAAAATGTTCGACAGCGAGTCGACTGCGTGCGTTTGTACAAGAATTTGGACATAATATTTTTTCTACCGACGGAACGGTGTTATTCTGTAAAATATGCAACGTGAAAGTTACTGCTGAAAAACGATTTTCCGTACAACAACATTTGTCAAGAGATAAACATATCAATGGATAAAACTATGTATTTACAGTTTACACTTGTAATAGATTTTCATAATGTA	239	6	2	4	2
0042A	TAACACGGGCGCCCGACGGTCGATGACGGCCGCCGATGACTGTCCGCCAATCACAGAACGTATAACCATCGCATAGGGTTCAGGCACTGTTCGGCGGCTCAGTCTGCGTGCGCGAAAGCGGTTCACTCTTAGATGGAACAGAGTATAAACAGACTATATCTATGA	165	5	3	2	2
002CC	TAAAATTTGTCATGGTACTATCTAAATTGTCAATCGAAAGGCAACCTCGGCGCGCAATAAATAAAAATAAGATAAACTCCTAATTCCTAAACGTATATAATATACCTACCTACGGTTTATCAACTAATATATATATTATGAGTATCTGGCATCTACTAAACACACTAAAATAGGAAA	177	5	5		1
0022F	TAATAACGAATGTACGGATCTTCAGGCCATTACGTCCCTGGCAGCGACATCCTCAGAAAGTGGATCGCTGAAAAGAAAACTGGAACGCACATCAACAGCAACGACAAAAAAGCAGAAAACAATGAAGAAAGCAGTGTCACCTTCACAGGTGTCAAACAAAGAGTTGACCACAGTCCACAACGAAATGAACACAGTCAAA	199	6	2	4	2
00146	TAAGGTGGTGTTGCACAGCAAGTCGGGGGATATTTTCGATTTGCGGAGCGGAGCGACGGCGCCGAGGAGCGTAGCGACGAGTGCCGCTAGCACGGCATCACTGTACGATGTCTTTCATCGTATGATAACTATCAATTAGTTTAGA	145	7	6	1	2
00311	TAAAAGCGCCGATCAGGTACAATGTGTCGTCGTTCATCGCCAATTGCGACCAGCCACTAAATCGTGATGAAGCAATCAGTGGCCCACATAAAAATGAATGGGAGGACGCTATGCACGATGAAATAACGTCATTACACGAAAACAACACTTGGTCACTA	158	5	4	1	2
00164	TAAGTGGCCCATACACGGAACGATCTGTTGTCAAACTCGTCGTCATACCAATCGTGTAGTTCCGTTTGTCAGACAGTCCCACACACGCATGAATCGCTCAGATAGTTGTCAAGTTGGTTTGACAATACGTTCGACCAACGATTTGACGGCAAACTGACAAATACAGCCATACACATGACGATTTGGTTTGTCAAACGCTGTTTGACGGCAGATGGTTTCGTGTATGAGACATTGGGACACTT	242	6	6		1
0032B	TAAGAGTGCCCAAATCGCGCATGCATACTAGGCCGCCAACAGCTGTCAGCCCCCAAAGCGACATCAGATGCCCTGTGATTGGTCGGCATTGTACGACCAAATCAGTCGACTGTTGGATTTGGCAGCGCACCGCCATGTATATACATGGTTATAAAAAGACTACAGCACTCCCTGTGGCCTATAACAAGATGCATGCGCGAACAGTACTAGTTTTCGTCCGAGCG	224	5	2	3	2
0023A	TAAGGAGACACACGTTTACATATATACGATATATATAGAGAGAGAGCAATTTTGGGACGCTGACGTGCGATTTGGAGCTACATGGTCGGGGTACGTAAGGTGAAACTGGTCGTAACTATGTAGTTGTCATCTCAGAGAATAAAATATGAAATAAAAATAAATTTACATTGTATAGTATAACTACGGCTTAGTGAAGGGACGCGCTGTGGCAGTGTGGAACGAAATGTACGGTTTACGATGGGGAAAAGCAAACTT	255	6	6		1
00281	TAAAAGTTTTTCTTTCTCTGCAACTCCAGAATCTACTGCGTAAAATATACGCAACTGGTTGACTAAGCAAGCTGCTTCAGCGGCAGATAATAATTTCCCATCGTACGTAGATCTCATCAAAACACACGATTCATCATCAGACCCACTGTGTTCAATCGTTTTGTCATTGTTGCAAAGGTCTGTATAATATTCAATAGTCATACATTCTGGAGCGTTTTCGTT	222	5	3	2	2
0026B	TAAGCATTACGGAGTGAATCAATCTGTGTGCAAAAGCGCATTTGTCATCCTGCACGATACAACTCCAGCGCTGGTACGAACATTGTGCATGAAGATGACAGTAGGGCATAATACACCTGTTGACGGCCGTGGTAAACATAATAATCGATCGACTATATCCGACGAAACAAAAGTTGCGATAAAAGATCATTTCTTCAGCAT	201	6	6		1
001F3	TAAGCAACATATCGTACAGAGACTCGGGTGGCTCAACAGAATTGCGAAGCAGCGGCATAACATAGCAGCGTTGACTCTCAAAGTCAACGATACCGGTAATGTTGACGCTAAAGTCATGCAAGAAGCGGGCCGATTTGTTTATGGTGATCTGTGGCG	156	6	5	1	2
0022C	TAATGTAATACAGTTATGTATACTCCTTTTCAAAAGAGAACATACCAGTCGGCGACCAATTTATGTCCGTCTGCGCGCATCCCTCGACAATTTCCCATTGTTAGCGTAATCACACGGTTCTCAACACACCAATCAAATCATTTGACATGCGCAAAAGCGGTATATTCTCTTTTGAAAAGGAGTATAGTTTATA	193	6	2	4	2
0037A	TAAGATATTATACAATTATATATACTACGGCCTTTGAGAGTCCATATGTAAAAACGCATCGGTTCCCCTTCTATACGCCAAATCATACCGATCGGAAGCTGGCCGATAACGATTGCCGATGGGCGTTGTTGACATTCATGTATACGTAGCGATAGCAGTAAACACGTTTACAAAATTCGACTAATTCGTTTTTATAACTGGTCTTTTGTGTCATTTACGTTACAAGGTTATTTTTTATTCAATATGGAGAATCGTATAACACCCCCAAAACAG	273	5	5		1
00316	TAAGATTTTATAAGAGGTCAATTCACTCTAATTTTTGAACCAACGAAGCTACGCGTGTTCTGCTGAGCAGTGAGCGTAGAATTTGCTATGTTACGCACTTGTAAGACGGAGACAACCCATGCGGGTATAACGTTTT	136	5	2	3	2
002DB	TAAGAGGACATGTGTTGTCTCCGTCTTACAAGTGCGTAACATAGCTAATTCTACACGAAGCAGAACACGTGTAGCTCCGCTAA	83	5		5	1
0030B	TAATATAAGATAACTTGTTTAGGCGACAACTACACTCACAATATTCACATAAACTCTAACATTCATGTTCATTGAGAGGACTGTGGCTTCAAAATAGTTTTCTTTTACTTCCATTATGGCCGCATCCACCTTTAGGCCTCCGAGTTTACCGATCAAACACGCAGCATAAATATCGGCACTAGCTTCTGACGCTTTCTTTGCGTTATTCTTTTTGTCGTTGCTATTGATGGCTATCCTAAATTTAT	245	5	3	2	2
0005F	TAAAATTGGACACTCGAGTGATATACTTACATAAGTGTGTGTGAATTGGACATTACCGGGTATCTAAGGCTTTTATGGGTGAATGAAAATCATGGCCTATCCAAATCCTTTATTCGTCTGTTCATTTACTTCTAACCCATCGTTGGAGAAAGAAAATGTTCTGAAAATGTCAAGTTGTAAAAAACATATATAAATACCGAGTTTATGAATTATGTTGAACGATTTTACCTCTTAGATGCGATTTACTAGTCGTGCG	256	10		10	1
002C8	TAAAATTGGACACTCGAGTGATATACTTACATAAGTGTGTGTGAATTGGACATTACCGGGTATCTAAGGCTTTTATGGGTGAATGAAAATCATGGCCTATCCAAATCCTTTATTCGTCTGTTCATTTACTTCTAACCCATCGTTGGAGAAAGAAAATGTTCTGAAAATGTCAAGTTGTAAAAAACATATATAAATACCGAGTTTATGAATTATGTTGAACGATTTTACCTCTTAGATGCGATTTACTAGTCGTGCGCAGAGTAGG	265	5	5		1
000D5	TAAAATCATGGCCTATCCAAATCCTTTATTCGTCTGTTCATTTACTTCTAACCCATCGTTGGAGAAAGAAAATGTTCTGAAAATGTCAAGTTGTAAAAAACATATATAAATACCGAGTTTATGAATTATGTTGAACGATTTTACCTCTTAGATGCGATTTACTAGTCGTGCGCAGAGTAGGTACTACACCAATGTTGCCGTAAA	204	8	5	3	2
003F4	TAAATACTGGTTGGATTGATACTATAGTCTGTCTCACGAGAGAACGGGACCGGCGCGTCCGCCACCAACTATTCGTTGTAAGCATGATAATGTGGTTGCCCACACACAAATTGAATCGTCTACATGCGCAAAACGGTCCCTTTCTTTCGTGTGACTGACTATATAAAACTAGAGAGTACTT	181	5	1	4	2
00106	TAATTTCTAGCAACTATACTGCGGGCCACGAGAGAACGCACAGAGCTGCTGACTAAAACTCGTCTATGCTTGCGCATCCCCACCATATGACCAGCAGCAGCATTACCCGTCGGTGCTGTATGGTGGGGAAAATGACGGCAGAGTGCAGTCATTCGGATGCGCAAGCCGTATACGTTTGCTTGTGGTCCGCAGTATAATTGTACATATATTATATACTTGTATTTA	225	7	7		1
00188	TAAAACAGGCGTGCCCTGCGCTTCAATTCGTTGCGGCGCCATTTGGGCAGCTGATAGAACTCAGCTGGTGACATTTGGAAAACTGCTTCAAATTCTGTGGGCGATAAGTGACGCTGTAAACAAATACAATTTAGTAA	137	6	2	4	2
0036C	TAATTATTTATCTATACTCCGTTCCAAGTATGAGCGCAACAGGCAGCGACCTAATTCCGTTAGGCGGCGTACATCCCGCATATAAATCATAGGTAGTGACCGGTGGAAGGGGAAAAAAGTGCACAGAACTGGTGCTCTCTTATTTGGAACAGACTATAGTTTATAAATAAAAACTGTAGCTTATTATTCAAATGGCTTTA	200	5	4	1	2
0021D	TAACTAGAAGATCAAGGAAAGAAGGGATCGCTTCACCGAGCGATGCTGAAACAACGTCAAAAGCTAAAAGGTCAGCAACACCATCAAAAAGATCAGCAACACCATCTAAATCTAAAAAACCGGTCACTCGTCGTAGTAAAAGTAAATCCGTAGAGAGAAGAATAAGAACTCGATCTAGATCAGCTAATAAGACTGCAGGTACTGAT	206	6	1	5	2
0019F	TAAACATTGCTAAAAGTGTATTATCAGTTTATCAATCTTTTTATTGGGAGACGGAGTGGTCGAGCGGACTAAGGCGTCGGTTGTGATGCACACTGACGCCAGTTCGATATCTCGGCCATGGGCAGCATTTTTCTTCGAGAAAGTCACGGTGTCCGGCGAACAAGTTCCGCTATCCCCTACCCGAGCGTGGCAGATACCTACGGGTACCCCAATCAAAAATTCTGCCAAAACAAACACACACGTGTTCCTCCCCCTACCAACAAAAAACCT	270	6		6	1
003F5	TAACCAATTAGGTAGGTAAATGTATTTATTTATATGGAGCTATTTACAGAATAGTGCCTATACTCTATTCAGAATAAAAATTCCTACTCGCTTGACGAAAACTCGTCTTGTTAGCGCATGTCTGTTGCCACCAGTTGGCGCTGATGGTGGCGGCGCTGCCCTTGCCGATGTTCCGTAGGTGTATGCGTATACGATTGCAATGGGTGACGGTAGCCGTCAAAAACTAGCGACCAATCACAGCG	242	5		5	1
0045A	TAATGGACCGAGTAGATGATCTAAATCAAGAAGCCATCAAATTCAATCGTTACCAACAAGCAGTTGTTCGTCAAGCTACGGATAAACACCGTTACTTGCAGAAACGAGTAATATTTTCAATATCTAAGTAAGAATTATGTAAATTACGATCTAAACATTTTTTTTA	166	5	3	2	2
00044	TAAGATTGAACCGCTCGCTCGACCAAAACACGTTTTTTTCGCGCATTCCGGACACCGGTGGGAGCGTATGCATGGTGGCCCGCACCGGCTCCAACGATCAACGACGGCCGGCGATGACCGTCGGCCAATCACGGAACGCATAGCCATTGCATGGGGAGTCAGGCGCACTGTTTGACGGCTCAGTCTGCATGCGCGATGCGGTTCAAT	207	12	6	6	2
003E3	TAATTTTTTGGTTTATTATCATCATGAATATTATTGTGGCTACCATTGGATTCTTTGTCGTCCGACGAGCTGTTCTGTGTCTCGGCCCTCTCACTAAAATCATTATATTCTGCAAAGTCTTCCACGGTCTCTGTAGGCGGTATCACTTTGTCGTCCGACGAGCTGTTCTGTGTCTCGGCCCTCTCACTAAAATCATTATATTCTGCAAAGTCTTCCACGGTCTCTGTAAGCGGTATCACTTCGTCG	246	5	5		1
00121	TAAGATTGAACTGCTCTCGCACATGCAGTCTACAGTCATTGCCGGCCGTCTGGCGCTTGCGCTAACGCTCTCACTGATGTTCAAATTGTGGCGAGGATACGGGGAAAAATATGTTTTGCTCGGCTGAGT	129	7	3	4	2
002B8	TAAAGGTACGTTTTCCCTGCGGCGTCTAGCGTCACTACTGGTCCGCGTCTAACGTAGCCGTTCCGTGGCGTCTGGGTCTGGCGCTGCAGGGAAATGGTACC	101	5	3	2	2
00397	TAACACGGGCGCCAGACGGCCGGCGATGACTGTTTGCCAATTACAGAACGCATAGCCATCGCATTGGGGGTCAGGCACTGTTCGGCAGCTCAGTCTGCGTACGCGAAAGCAGTTCACTTTTATGTTGAACAGAGTATACAAATATGATTTTATTACATAATATACATATAAATAGATCAATAGACATCAAATA	193	5	2	3	2
00078	TAAACGGCACGTCATGGCGGTCGGCAGACCCGTTATACGAACGCCGAGCGCCGC	54	9	8	1	2
00098	TAAGCGGCGCTCGGCGTTCGTATAACGGGTCTGCCGACCGCCATGACGTGCC	52	8	3	5	2
002CE	TAAGGGCCGTTATTACAATGTCCGGTAAAGTGTCGGTTTACGCTAACCGGATGATAACAGATTTTATTACCGGCAGAATTCCGCC	85	5	5		1
003E6	TAATACCATTGCAGTGCTCGGGGCTGCTGACCACATGATCAACGGCTTTTTGTTCGTATCTCTCTGCAAAATCTGTGTCCATAGAACGTATACCGCTCAGGAAGCTGTCTTTGTCTTCATCGGACCACGTCTGGACCCATTCAGTGAACAGCTTGATGCGGCATTTGAACAGACTTAGTGGACGGCCTTCCTCTTTGCACAGGGTTTCCATGATCGACGGGAGACCATTGG	231	5	3	2	2
00166	TAACAAAAATATGGAAATATATAAATTTTGAGCTAGAAAAAATTCATACAATAATCACTGAATTTGTGAACCATAAAAATTTATATTTACCTAGATCTTGAAGGAGATCTGCTGCCAGATTTGGAGTGCGAATTAGATGCAGATCTACTTCCTGAACGAGCTGGTGAATTAGAAGCAGAACGACTACCAGATTTTGATCGAGCTGGTGATCTCGATACTGACTTAGA	227	6	6		1
0035C	TAAAATATCGTAAAAAACCAACGAGAGGGCACAGATAATGTTGTTAGCTAAAAGTTTGATAATAGGTCAATTCACTCTAAAATCAAAAATGACAGCACCCTATTGAAACTAGCGAACGAAAATTTTCTATGTCGTACGTTTGTAAGACGGAGACAACACATGCGGGTACGACGTCCT	177	5	4	1	2
0010F	TAACCGTGTATTTGGATCTATATTTTACTATATCACTATCTAAAAATACTAGACTACTTTTGTCCAAAAATAATAACAGCCCAAATTTTACGCGGCCCACCGAGATTTTCTCGGTAGCTCGCCGGTTCAATCCGGGCCTGTGTATCAGTATTCAGTAAAAAAAATGTTCTGTATTATGCAAAGCTTATTGTCAGACAGTTTTTTATCTTTGTTATTGATACCTTTATAGGTCTATTTATAAA	242	7	1	6	2
001FB	TAAATTTATAAATAGACCTATAAAGGTATCAATAACAAAGATAAAAAACTGTCTGACAATAAGCTTTGCATAATACAGAACATTTTTTTTACTGAATACTGATACACAGGCCCGGATTGAACCGGCGAGCTACCGAGAAAATCTCGGTGGGCCGCGTAAAATTTGGGCTGTTATTATTTTTGGACAAAAGTAGTCTAGTATTTTTAGATAGTGATATAGTAAAATATAGATCCAAATACA	240	6	3	3	2
00308	TAACTCATAGACCTTATACTAATAGACGGAACATCCAGGCGGGATGCGGTTGGATGGTACGGTTTGCGTTACAGTGATATATATATATTATTTACAGTAATATACAGAGTATTGTATCATCTAGTGCGCATGTGCGGTGTACGTTGTACTACCTTGATAGTGCCGTCACGCTTGGACGCCGGAACTACAACCACATTCCGTCTATTAGTATAAGGT	216	5	3	2	2
00320	TAACAGTCTAAAAAGTTGGCGGCCATCAGTAGTTCCAAAGCGATTTGTGGCTTGATAGTAAACTCTGGTATTTCAGACGAACTGTTTGAATAACGAGCTTTGTATGTGAAGTACATACAGACATTGTGCAACACGTGCGAGCTAAACAAGAGAAAATCATCATCATATCAATGCTTCTGACGCATCTATCCAACAATGTTGTTATTGCTTACGGTATCTCCCTGAAGTGAATTTTCG	237	5	5		1
000AD	TAAATCCCAGCAACTATGGCCATTATCTGATTGTGGGGTTTTATGATTGTATGTAGTAGGTTTTGTAATGGTAGGGGGTTTTTACACGTGTGTAATGAGTTTGGCAGAATTTTTGATTGGGCACCCGTAGGTATCTGCTATGCCCGGGTGGAGGATGGCGGCACTTGTTCTTCGGACACCGTGACTTGTCCGAAGAAAAATGCCGCCCGTGGCAAAGGAATCGAACTCTGGTCGACTGCATCGCAGACGACGCCTTAGTCCG	262	8	4	4	2
00422	TAATTACTACAGGTGGTGTGGTAGTCAAAGTGACTGGTGGAGTAGTAACTATTGGAGTGCTTGACATTATATGTTGAGTCGTCGAATGTATAATTGTCTGGGAAGACGTTATCGCCGGACTTTGAGGTATCGACACAGAAACGTGAAAGCCGAGTTCGTTATTTTTTATTTCTATTTTATAACCCGGAGGTAGGAACGTA	200	5	5		1
001D1	TAAAATCTCTAGAGATTCTCTAGACAATACAGCCGTGCAATGTTGACTACTGAGCCCGGAAGCTGAAGATTGGATTGAACGCTTGTATTTATTGCAGTAGTGATTATCCGCCAAACGTTTGAGGGACTCGTATTTTTTTATGCACTTAGTGGTATCCCCACGGAAGGAATCACCAGAACTGAAAGCCGCTCCCACTTCTTTTCGGATATGTTCACCTAGATCTCTAAGCAATACACGAAACAGTT	245	6	4	2	2
002D2	TAAAAGAGCTATTATAGATAATCAAACAAATAAAAACAAAACCCTTACCGATTGTGAATCATGTGACTTTTTACTAAATGACCAGCAGTCAAGGCCGACATCAGCGACAGTTCGCCGGCTAAAACTGTTGCACATAGTATACGTGCTAATAGTTTGGCGTTTGCCCCAGGGGTTTGAGAGTTTGCACCTCGTACGCCAAGCATTTCCAAACACGCAGATTGACCAGGTAAAGAAGTTCCTCCGCCTACTGTACCAATCTCAACCG	265	5	5		1
001AF	TAATGTTATAAAAAAAATATTTATGTATCATTGAAATGAAATAATATCATTTATTATTAGTGGCGACGTCTATCTCTATCTCTTCTGTCATGTTTGTGGGTTCGGCTGCGACTACGACTACGTGAACGATGTCTACTGTGGCGGCTACGTGACCTGTTGATGCGTAAACACAAAACATATA	181	6	6		1
0025D	TAATGTTATAAAAAAATATTTATGTATCATTGAAATGAAATAATATCATTTATTATTAGTGGCGACGTCTATCTCTATCTCTTCTGTCATGTTTGTGGGTTCGGCTGCGACTACGACTACGTGAACGATGTCTACTGTGGCGGCTACGTGACCTGTTGATGCGTAAACACAAAACATATA	180	6	2	4	2
00342	TAATTTTTATTCTATCAGTTAGTTACTGATTATATTTATTATAATTATAATAATTGTTGATGTTGTCTGATGTCAGGATGTCAAACAGTAATAATGCATCGCCCAGCCGTATTCCAAAGCCGAATTGGTTGCGGCACTCGAATAAGACACCGAAGATCCAAAGACATCAGAGTCTAGTGAGTGAAAAACTGTTTTTCACATTTATA	206	5	5		1
0040F	TAAATAACTATACTCTGGCCCACGAGAGTCCATACGTAAACCACGCATCGATATAGTAATATGCGACGTCTGTTTTTTCCCACCATGATGCCTAACCTAACCACTGTTCGGCAACGTGCCGATGCGCAGCGACGGACACGTTTTTACGTGTGGACTCTCGTGGGCAGGAGTATATAA	177	5	3	2	2
0033D	TAAGGTAGTCTCGTAAAACTGGAAAGTACCATTTTGGTAGTCTTAGATAAAAGGATTGTGATGTTTCACAAAATAAGTGCGGTAGTTGCGATAACGGAGGTAGTCTTGGGTGGTAGTCGCGATAACAGCCGTAGTCTCGTATAACAGGAAAGTACCGTGAAAAATAAT	168	5	3	2	2
00063	TAATTACACAATTTCAATTTTGAAAATAAGTTTGATTAGTTACATCACAATACTGTGCGGAAGCAGACGGTCACATGACGGGCAATGTGTTAGCATATAAACGTAAAATTATACTTATAATTCCATCATATAAAATATAAATGTCCAAAGAAGACAATATTGTGCA	166	10	3	7	2
003F8	TAATTCTATTGATTCTGATGATTGACGGTTTGAAACTATTGATTTTGATGGTTGACGGTTTGAAATAGTTTTCCTCATCCTTCCCATAATACAACTGTAAACATAAAATATATAAGGGGGTAATGTATTACATTTTTCTAACATCATATGAAACAACTCTATTTCAATTATAATTATACATATATACTTTTTTCTTTA	198	5	3	2	2
003CE	TAACACTTTGAACGTCGCTGAAGCGTATACGCGTCAACAATTTATTCCAACAAGCTGGTGACGTTTATATACGCTATAA	79	5	4	1	2
00365	TAACACGTTGAGTGCCTCATAGTATTTGGCGCGCATTGCCCTAGAATCCGCGCGAAATCGGTCCCGGGAAAAAATAACCATTACTTTGCTGAAAATAAAATCCGAATACACCGTTGAAAAGAAGACATTTCACTGAATAACCACGTATAAAAACGGAAGAATTGCTCTGATAACCGAGTAAATTATAAGGCCATAAAGATGCCTATACAAATTGTCGACTACCCGTCGACCGCGGCACTCATCGTGTT	248	5	5		1
00107	TAACACGATGAGTGCCGCGGTCGACGGGTAGTCGACAATTTGTATAGGCATCTTTATGGCCTTATAATTTACTCGGTTATCAGAGCAATTCTTCCGTTTTTATACGTGGTTATTCAGTGAAATGTCTTCTTTTCAACGGTGTATTCGGATTTTATTTTCAGCAAAGTAATGGTTATTTTTTCCCGGGACCGATTTCGCGCGGATTCTAGGGCAATGCGCGCCAAATACTATGAGGCACTCAACGTGTT	248	7	7		1
0011D	TAATATACATGAATTTTATTATAGACGTTCACGCGAACGCAAGAGACGTCGTAGCAGAGACCGTGGTGCTAGGGATGTAGAGTATGATGAAGTTGAAGAGGTTCCCGTTACCAAGTCTAGAGATAAAGATCATGAGCGTGAAAGAAAAAGAAAGCGCAGTCGTTCTAGGGACCGTGAACGTAAGAAGGATCGTAAAGAAAGAGATCATCATCGCCGAGACAAGTAAAGTGTCATAATAACATTGTGG	247	7	2	5	2
0024F	TAATGAAGGAGGTGGATTAGGGGGTACAAGACGAGGTGGACCAGAAGTCAACTTGAAACATTCAGGTAGGGAAGATAACGAACGGGAAAGAGAAAGGTATGCTCGTGAAATGGCTGGTAGTCGTTCCGGACGTAGTGTTACTACAGAAAGAGATCGAGAACGTGATTATCGTGACCGAGATAGAGATCGTGAACGTGAACCAAGACGTCCTCGTAGTAGAGATCGTGAAAGAAAACGTCATCGTTCTAAGTCGTATGTATT	261	6	5	1	2
00156	TAATACGGGCATAACATTATAGATAAAATAAAGTTTTTGTGTAGAACGTAAATATACGTCCATACTCCCTGAGGCGCGTTTCAACAAAACGTATATATACGTCCATACTCGTCAAA	116	7	5	2	2
002F0	TAATATTTGATACCGTCAATAAACGATGGCGGCACCGCAGAAGCAATGCGAAAGCAGATCCCGCGGCGTCGTC	73	5	2	3	2
00363	TAAGACTATACTCCGGGCCACGAGAGTCCATACGTAAACCGCGCATCGATACTGACGGTCGCGACAGCTGCCGGCCAAATTTTCTCCCACCATAGTGCTGTTCCCACCACTCGGCAACGTGAATACAGCGGGTCATAAAAACACGACTGTCGGCGATCGTTGCCGGCCGGTTTCTGATCGGTAGATTCAGCGTATGGAAGGGGAACCGATGCGCAGCGACGGACGCGTTCTGACATATGGACT	243	5		5	1
00289	TAACGACCGCATCAGATGTGTACGATCGTATGTCGGAGTCTTTGAACGGCTACAACAACGTCAAGTATATGCCATATCGTATTGCTCTGAAATTGACTGTTTTACAAAAATACACTAGCCGTAAGTGCACATTTTATTTATATCCCTATTACCTACTCCTGTTACAAATAGTGATGCGATAGTTGTATCCACAGACTAAGATATAATATGTACCTACCTATTTTATTATACCTACTTATATCTTAG	246	5		5	1
00257	TAAAGTATATTTATAAAGGAGGGGATCCCACGACTCATGTATTTGACAAATATTTGGTATTCGCGGATACTCGCCGAGTAATGGGAATGGAGTACTTTGTACAAATATTCGTTATTCGCCACCTTCCCGTCGATTGTCGGTAAATTGCAGATTATTCGTGTATTCGCGGATATTCGTCAAATATTTGAGTCGTGGGATCCCG	202	6	3	3	2
0035B	TAAAGGCGGGATCCCACGACTCAAATATTTGACGAATATCCGCGAATACACGAATAATCTGCAATTTACCGACAATCGACGGGAAGGTGGCGAATAACGAATATTTGTACAAAGTACTCCATTCCCATTACTCGGCGAGTATCCGCGAATACCAAATATTTGTCAAATACATGAGTCGTGGGATCCCCTCCTTTATAAATATA	203	5	3	2	2
0046E	TAATTCTTACAAAATATAAGTGTTAGGTATTTTTTATATAATTTGTATTAGAACTCCTGGATCTTCACACGAGTTTTCTCAGTGAGGTCCAGTATTCATATGCAAATGAAA	111	5	5		1
00180	TAAGGAGAATCATTTAGGCAATTTCCAACCTCGTTGTCGCCACTCGACGTCTATGTGTTTGTCGTAAATGATTATTAGTGTGTGTGGCGTCCATGTGCGTCAATTGTTGCGGTACGGAGGGCTCTTGCACGCACTCGCACGCACATGTCAGTATGTAGTATTGTGATCATGAAAAAATGTTTATTTTTCACTCAAACATACGATTCTAATTTCAACAATACGTCGCAACGATT	233	6	2	4	2
001A5	TAACGATGAAGATAAAATATTACGAGGGTTAGCGATCGAAGGGTAAGGTGTACCCGTATAGATAGAGTATTTTTGCCGTTTACGTAGGTGAAGTTA	96	6	5	1	2
002C1	TAAGGTGTTTCACTAAAATTCACATTTATAATTAGTGTGTAAGATGCTGCATTACTGACAACAGCGTGCACGTGCGGGTGCTCTCCGCTATTTATTTTATACACAGTCACTCACACTAATGATCACACATGCATACATTTACACTACCCGCAAGCACACAAATATAAAATTGCCTATA	178	5	3	2	2
000E3	TAAAAAGTAAGTCTAGCGAGGATCGAGCGCGCGGCGTAATGGTACGTGTATTAGAAATACACGGGTGACAATGTACGCAATGGTCAATGTCAATATTGTATGGACCTGCTCAACTAAACTGTTTGTGAAATAATAATGCCCCTCTCCTGCGAGTACGCCGCGTAGGTCTCGCCACGGAGGCAATGGGCATGGTTACATCCAGCCGCGACGGCGGCGATACGGCGCACAACGCAAACTCTGGAGTG	245	7	7		1
00419	TAAAAAGTAAGTCTAGCGAGGATCGAGCGCGCGGCGTAATGGTACGTGTATTAGAAATACACGGGTGAAAATGTACGCAATGGTCAATGTCAATATTGTATGGACCTGCTCAACTAAACTGTTTGTGAAATAATAATGCCCCTCTCCTGCGAGTACGCCGCGTAGGTCTCGCCACGGAGGCAATGGGCATGGTTACATCCAGCCGCGACGGCGGCGATACGGCGCACAACGCAAA	235	5		5	1
0048A	TAAAATCGGTTTTTCGTTGTACAGATATATGATTCACTAAATAGATAAGATGTGCGAGATACAGCCATGCTTATGAGAAGGCGATATACGGCCATACGAGTCATTCCAAATATGGTATTATATCTAATAGACGTTGCAAATATGGGCACGCGGGTACAGGGGGGAATGCTAATGTGAGTGGGGTTTACTATCTACGCAATGAGACGCATCTTGCCGTTAGTAATTACCCCAGTCCTCAA	239	5		5	1
0048B	TAATTGTTTGACTTTTATACGCCATTCGTTCACTGTTTCCGTATCAGCCGATTTACTTTCGCCGCAAACCAC	72	5	2	3	2
000EE	TAAAAACACTGGCCACCGTCAACATGAGCCGCCACCAGCGTCGCTGTCGCTGCCCCCACTCACCTACGCCACTGCCGACCGGGAACTGAGTGGGGGTATTTACGGCGGCAACTAGGTGATAGAGTGGGAGAAACCGCGGAGCTCGGTCAGTTGGATGCGCGAAGGAGTAGCGCTCTTAGAGTGGCCGGAGTATAGTGACTGTGTATTACATACTCTGGTTTCAAAATGTGCATT	234	7	2	5	2
0010A	TAATTCCAAGTATTGTTCAGACAAATGTGGTATGAGTTTAGCTAATGCTAGAATTTTTCATGTAAGTCTAGTACCTATACTAAGGCCCACGAGAGTCCATACGTGCTAACGCGTCCGTCCCTGCGCATCGGTTCCCCTTCCATATGCCGAATCATACCGATCGGAAGCTGGTCGGCAATGATCGCCTACAGCCATCGTTGACATTCATGTTTATGTAATGACAGTAGTAAACACGTTTACGAAATTTG	248	7	7		1
00034	TAATTAGCTGTTTTTCTATGAGCCGCTGTATTCACATTGCCGAGTGGTGGGAATGGCACTATGGTGGGAGAAAATTCGGTCTGCAGACGTCGCGTACGTCAGTATCGATGCGCGGTTTACGTATGGACTTTCGTGGGCCGGAGTATATATTTTTTATACCAA	162	13	11	2	2
002A4	TAATTGGTATAAAAAATATATACTCCGGCCCACGAAAGTCCATACGTAAACCGCGCATCGATACTGACGTACGCGACGTCTGCAGACCGAATTTTCTCCCACCATAGTGCCATTCCCACCACTCGGCAATGTGAATACAGCGGCTCATAGAAAAACAGCTAA	162	5	3	2	2
003FE	TAACATTTTCTATACTCTGTACAGCGAGAGAACGCGCCGATTCTGTGCATTCCCCCGTGTCTCTTTCCTATCGAAACCGGTTCCCTTATGGCAGAGTGTTGTGTGGGGAACCAGTTCTGGTCGGTGTGTGGCGCGTTCTCTCGCTGGATAGACGGTAAACATGATACAATTTAGAAATTTTTTTGTAGAA	190	5	1	4	2
001BA	TAAGTTCTACAAAAAAATTTCTAAATTGTATCATGTTTACCGTCTATCCAGCGAGAGAACGCGCCACACACCGACCAGAACTGGTTCCCCACACAACACTCTGCCATAAGGGAACCGGTTTCGATAGGAAAGAGACACGGGGGAATGCACAGAATCGGCGCGTTCTCTCGCTGTACAGAGTATAGAAAAT	190	6	5	1	2
002C9	TAATAACCTGGCGAGCTTGTTGGTGTTTCGTCTGAACGGCGACTTAGCGATGGCGGCCTTGTGTTTGATTCGGCAGGCGTCAATATCACTTGTCTCTCGGAAGTACGACTGTACACGCGCGTTGCACCCAACATCACGGCAGGGACAGTAGACATGAGGTCCCACTGTCTTAGCTTCTCCCTGTCCAGTTGCTCCATTGATGGTGGTCGGGTCATCGGGTATAGGCCCTCCTCTAAAAAAGACTGGG	247	5		5	1
0012E	TAATGCGTCCGTCGCTGCGCATCGGTTCCCCTTCCATACGCCAAATCATACCAATCGGAAGCCAGCCGGCGATGATCGCAGCTGTCGTTGACATTCGTGTATACGTAGCGACAGTAGTAAACACGTTTACGTTATAAGTTTATAACGTATTTTTTTACGAGTTTTTTTGCGA	172	7	5	2	2
0023B	TAATTCGTTATCATCATCATCTTCACTAGTGCATGAGGTTTCTGATTTATTTTCTAGTACAGTTGACTGTGTGTTACATATTTCATTTTGTTTTGCATGTGTACTCAATGGTTCAATTATT	121	6	6		1
0037B	TAATTAGGTCATATGCAGTGTTGAAAGTAATTTGGTAATTTGCTAAACGTTTTTGCTTGTCTGCTACATACAAATCTATCAAATTCTGTAATTGACGAAGGCGGTACAAATCTACATGTGACAAGGTAATGTATTCCT	138	5	2	3	2
00269	TAAATAAATACATGATAACATCATCTGATAAATCTTGGAAACCAACAATTTCCCTTGAGGATTCAGGACGTGATGTCGTTGTTGTAACCTGAGACTCTATAGGTTTCTTTGTTTTCACGCGCGAATATTGACATCCATCTTCTAATGGTCTCTTGCTACTGTTATCCATGTTGCGGGA	178	6	6		1
00260	TAACAGAGTATACCTATTACCTACAATAATGTGGTTGTTATGTTTTTCCATTCTCGTGACCGGCTGCAGATGAACGAGTTATCATGATATGCTCCGTGCTCGTGAAAGAAACATACGTTGTCAACCACAAATGGAACGAGGGAAACAATTTGATTGCACCACCCGGCACGGCCGACACGACAGTGAGCAGTAATGGTAACGTCTAT	206	6	6		1
003CF	TAAGCCCCGGGGGGTTTGGGGGCCGAGCCCCCATCCAGCGAGAGGTCCGCAGGACCTCGAGTTTGGCGACCGGAGCCGGCAGGCGTAGGGAGCTTCTAGAGCGTCGAGCGTATTCGTAAAAACTCAGAATTCGAAACTGCCTTAGCATATAACTTCAAAACGAAGTATGCCTATCTAATTTTGATTGCACCGTCGTT	197	5		5	1
003AA	TAATATCTACGGAAGACACTATAGATTTTGGAGGGGAACGACCAGTTGGTCTATGAGTACATGATGGATCAGGAGAAGGACAAAGTTTAGGTGATGACCTTGGTGATAAATCTGCTGGTGGCTGATTAGACAAGGTGCGCAATGTTGCCGAATAATGACGACGAGATTTTGAATTACAACTAAAATCTATTTCCATTCGATCGCCACTATCACTATGTTCAGACATACTGGTCGAACCAG	240	5	5		1
00232	TAATGGTTAGTGTTGGCTTATTGAAATCAAGTGATTATTCAATAGAAGAATGTACTGTCATGAAACATAAAGTTGATTCACTACTAGATACTATAAGAGGGAAAAAAAGGAA	112	6		6	1
00367	TAAACTTGGATATATCTTCAGGCGACGGAAGCCATTGGGTAGCGTTTTATAAAAATAAGGACAAAGTTGTATATTTTGATAGCTTTGGTGATTTACCACCACCAATTGAATTACAACATTATTTCAGACAGTTCAAAATAGTATACAACTATTCCAACTATCAAGACTTCAATACA	176	5	3	2	2
000D6	TAAACTCTACTATACTCCGTTTATCGAGAGACTGCACTGAGCACCGACGAAAACTAGTTCCCTACAAACACATTGGGTTTCAATAGCATGGCGACACGGAGGGATGCGCAGAACCAGCGTGCTCTCTCGCTGAACAGAGTATAATATAGCCATCTATTTCCAAA	164	8	5	3	2
003A7	TAATAGCATTAGCTATTCTTTCCAAAGTTGCTATTTCTTCTTTCTCCACCTTATGATCACCATTGCTATCAGGAATTATTATAAACTCTACTGTAACCGTTACAGTAGCTTTCTTCTGTTCTTTTAGTTTACCAACATATATTTTAGTTTTGCGACAATAGTCGTAGAATGCCCGAGCTGCAGCACAACCTGAGGCAAACATATCTTTTCGCTCGCAAACAATCTAAGAATCATTTT	237	5	2	3	2
00380	TAAAGGGGGACGAGGTGGCCGAGTGGTCAACGCGTCGGCTGCGATGCTCGCAGTCACGGGTTCGATCCCCGGTCACTGGGTGGCATTTTTCTCCGGGCAAGTCACGGTGTCCGGAGAACAAGTGCCGCCATCCCCCACTCCGAGGCATGGCAGATACCTACGGGTGCCCCATTCAAAAATTCTGCCAAAATACACCCACGTGTAACACACCCCTACCGTCAAAAACCTACTGTACCACCCCTCCTCCCAATGGCCTAAGTTGCCACGGGATAATT	275	5	2	3	2
003EE	TAAATTACGCGCCCAATGCAGTTCGGTGTGATACTCAACAGGTAATTTACAGTGTGACCCGGTACAGTGTAATCGAGCGCCCGGTACTC	89	5	1	4	2
00433	TAAAGAGTACCGGGCGCTCGATTACACTGTACCGGGTCACACTGTAAATTACCTGTTGAGTATCACACCGAACTGCATTGGGCGCGTAA	89	5	4	1	2
002B0	TAATATATCCGGGCGCCCGGCGCTCTACAGTGTAACCGGGCGCCCGGTACTCTATTACATGTCCGGGCGCCCGGCGCTCTAGACACAGCGTTATA	95	5	1	4	2
000DC	TAATCGCTGTGTCTAGAGCGCCGGGCGCCCGGACATGTAATAGAGTACCGGGCGCCCGGTTACACTGTAGAGCGCCGGGCGCCCGGATATA	91	7	5	2	2
00366	TAAGTTCATTCCCGCCGTACCAGCGAAGGAAAAACGCTATCGTCGGAGTGGTGCTAATGAAC	62	5	4	1	2
0011A	TAATATGTGTGTAGCATTTGAACAGCGAACCTCGACCCGAAAGTAGTAAACGAAAACATCGAACACCATACGATGAACTGTCTGACATATTCCAACAAATAGGTCAACATGAAAACACCGACGAGGTTAGTTGTTGAAATAATTTATTATGCCATGTAATATGTGAAAAATAAAATA	177	7	6	1	2
001E6	TAAATCCGACGTCTACCAACGATCACACGGTCAACAAAGTGGCTGTGTGTTCAGCGATTTTTGCTGGTTTCGCTTACGTCGGATACTCGGTTGCAAAGAACGCGTTCGGGCGACGTCTGGGCCGGAAGAACGACGACGGTAAGTTGATGCCCGATTATGTTAGCCTAGA	169	6	5	1	2
001A8	TAACGGGCTCATAAAGTCCGGTGCAATGAAAATTGATGATCGACCCATTTGGTACGATGTGTACCGGGCGTTTCCACCTGAATCGGAGCCGCATTATGCAAAGCCGTCTCAATCGA	116	6	3	3	2
0030D	TAACTAATTACCCCTATGTCCTGAAAGTAGAGAAGAATGACTGGGTTCTGGCAATCTGGCCTCTGGGTAAAGATAATTATAA	82	5	1	4	2
004B5	TAATCGCCGATTATCAACGAACAAGCGTTGAATGCGTTGTAAAGTCAATTCATTTGGTTTCTGATCAGAGTGACTAAA	78	5	4	1	2
00321	TAAAACGATCTAAAGATAAATATTCAAAGAAAAAGTCACGCTCATCTCGTCGTCGTACTAAAGATAGTACATCTCGATCTCGGTCTCTGTCGATGTCAGTTAGCTCAAATGATCGTTTACGTAAGAAACGAGTTTCCTCAAGTGAAGAATCAAGTCCAAGGCGTAAGCATAAAACATCTAAACGCAAACGTTCAACTCGGAGACAGAGGAGCAGTGATAGTAGTTGCAGCACTAGATCAT	240	5		5	1
0010E	TAATGGGGGACGGAGTGGCCGAGCAGACCAAGGCGTCTGTTGCGACGGTGCGCGTTGTAACTGACCCC	68	7	4	3	2
000BF	TAAGCCGCGCCCACTACTCACAGTCGGCGGCTGGCCGACGATTTTGATCATTCGGGAGCGATGGTTATGATTTTGTCAACCTTCGTCTATGGCGGATCGCGTAAATATAAAATGCATACATGTGACACGTATATTATGCCGCATTGCCGCCGTAATA	157	8	6	2	2
00066	TAAAAATATTACGGCGGCAATGCGGCATAATATACGTGTCACATGTATGCATTTTATATTTACGCGATCCGCCATAGACGAAGGTTGACAAAATCATAACCATCGCTCCCGAATGATCAAAATCGTCGGCCAGCCGCCGACTGTGAGTAGTGGGCGCGG	159	10	7	3	2
00453	TAATCCAAATACGAACTGATGTTGGAATATGCCTAACTGCTTGGGCGATAACAGCTTTGGCAGTTTCTGGAGGTTGTAAACGAGCAGCTTCAAGCCAAAGATCTTCAGATTTTGGATTATCTTCACAACCCTTCATGATAACGTTACGAGCAGCTTGAATTTTTCCAGTTACTTCTTCAAGACGAGCTGATGCTATCCAAGCAGGTGGATGATTAGGATTTGTTTCTCGAACAGACTTT	239	5	1	4	2
00443	TAACTGGTTCAAGCTCTGATTTACGCTGCCGTTCAGTCTCTGTGGCGGAATATTGCTCAATGAGCTTAGCTAGAGTCTTTTTAGCACGCATCGATTCCAGGCGGGT	106	5		5	1
0011B	TAACGGTTATAAATATTTAGGTCGTAAGCACCACTAAATTGATGTAAGCGACATTCGAAAAAATGTGAAATTGCTTATGCGACATTATTGTTGCTTACGACGTTTTACATGTTTTCCCGCGCATTTATCTGATAACGTTATTGGTGATTACGACTAAAAGTCTAAAACGGAGTTTTGATTT	181	7		7	1
00400	TAACTGAAAATGTTCAGATTAGATCAAATCCTTACAGTAGATGGGTCTTCAAGCGAGTCTTCAAGTTCTGCCCTCCGTAAAAACACATTTCCTCGGCTGATACGCCATAACATACGCTCAAAACCAGGTACTCGTTCTCGGGGCACGACTCCGGCAACAAACCTAATGTAAAAATAATAAGAACAATAAACATACCTA	198	5	4	1	2
00209	TAAATAGCGAAATGAACGTCTTCCAGCGAAAATTTGTCAGTGAAGTACGACGCTGTGATGAACTAGAACGTAAATTGCGCTATATTCAAGCTGAAGTGCACAAAGACCACGTGCATGTTCCTGTACCCGAAAGCAGCGTTTTCCCATTCGCTCCTAATCCGAGGGAAATTA	171	6	6		1
0043D	TAATATTATCAACAAACATAAAAACAGTACCTTGCAAGTCGGTGAGCACCAGCTTGTTGTCGTATCCACCAGTCAGCAGATAATAGGCGCTTGGCGAGAACCGCAGCGAACGCACATCGGCCGAGTGCGGCTTGAAACACTGCAAGCTCCTGGAACCTCGGATGTCGTACAAGACGCACGCCGAGTCCTCGTGACCGCTGACCAACAGTCGCCCGGACGGTTCCACGCAAACGGCGGCCACCGGTG	246	5	5		1
00274	TAAGAGTTATTAGGAAATGTAAAATAACCGCGTGACATTATTGGGACCAGCTCATTGTTATTGACTATCTTATTCGTGTAAAGTAAAAGTTCCTCGCTTCAAACAACGATTTACCAATCTAAAAATTTTATTTTTGAAATTTAGTTTGCGTATAAACGTGTGATTTTATGTGTCTAAGACGATAAAAGTATCAAAAATTCAATATAACGTTTA	213	5	2	3	2
00354	TAACCTGGAATATCTGATATATTTCGATAATCGATATATCGTACGATATATAACGATTATCGATACCTAAATTTCCGAAAAAAAGTTCGCGATATCGATATCGTTGGAGAAGCCTAATAAATTTGTAATCTGAACAATTTA	141	5	2	3	2
00200	TAAGTTGACCCACTTGTCAGACGAATAATGGTCGCGGTCGCGCAGGCTGGCTCGTCTTTGGAGTGCTAGTGGTGATCGTCGCCAATCACAGACCGCTGGCGCCTACTTGGGGGGTCTAAATGTTCCGGCGGCTCAGTATGCATGCGCGAAAGTGGGTCAA	160	6	4	2	2
0013F	TAATATCGATTTACAAGTATTGTAAAAAATCTTATTTATATTGTTATTTGATACTATACTCTATTCGGAATGAGATCGTACCTCGGCGTCCAACTTCTGCTCATGGCGTGGCTTCGTTCCGTAGCGCTAGCCCCATGAG	139	7	5	2	2
001E5	TAACAATGCGGACGGCCATCAGTTTCTTTCCGTTATTACGTCCGTGCATCATCAAAGAGTTGGTCAAACGTTCAACGATAGGGCATTGAGCCTTACGGAAACGTTTAGCAGCATAACGACCAGCAGAGTGAGGAACATATTTGGCGTACTTCTCTTTGACAGCAATGTAATCCTATAAAATTCAAATGTTCCAATTACTGTACTGTCTAGT	211	6	5	1	2
00479	TAATTTTATTATAATACGAGCATCTTCCACCACTGTTCTGACTTCTGATTATAAACGATAATGAGCGTACATTATAGGCATCTTGCCTCCATAAGCACCGTATCAGCGTAGCTCCGTAGTCCTAATCATCGTGTAGCGACTAGCAAGTATCGACGATCGACCTATTATTTCTAAGAATACACGGATAGTGTATACTATACTACAGGTACACAGCCCCGGCTATCTAAATTTCT	233	5	2	3	2
00328	TAAGGGAGTTCCAGTAGATGATTTTCTAAGTAGCAAGAAGAAATTAGGCAAATTATGTGGCAAGAACAACCGGGCCATGTCAATGTGTGCGAGAGTAAATGAACATTAGTGTGCATGTGTATGTCAACGCGTTGCGACCCGTATCCACAATCTTAGAACCGGCATAATCGTACTCGCAGGCGCATGTGAGTAGA	194	5		5	1
00373	TAACAACCAGCGCATCACCTGAGAATTCTGATGGCACTGCCACTGCTACTGAACCACGTTTCCCATGCCCCAAGTGCCCCCGTAGCTATCGAAATCGAAATCACCTTTACCGCCATGTGCGATACGAGTGTGACCGCA	138	5	2	3	2
000D4	TAACGCTATGTCCTAGCTGGTTTGCACGCATGCGGGGAAAAACAATATAGCTTGTATTTCGCCGCATGCGGGCAACGCATTGCGTGCAGAACAGCATGGACAGTATATAAAACGCACGCACTCGCCCGCACTAGCTAGGACATAGGGTAAGAGAAA	156	8	5	3	2
000CA	TAATTACTTTGCAAAAAAACACTCACTATACTGCGGCCCACGAAAGAGTATCCTCGTTTAGCGCATGCAGACTGACGGCGGAGACCATTCCGAGGCCCCATTTCCCCCACTATTTCCACGACCGCTATACACCGTATAGCGTTGAGTGCAGCCGACCGTTGCCGAACAGCTATCGGCAATGCGCGGAATCGGACGAGTTTTCGTCGGCAACGGGATACTCTCTCGTGAGCCGCAGTATAGTGTAACTTT	249	8	3	5	2
00398	TAACGTGTTTGTATCATTCTGAATTTTTCTAAAAATTAGTCCAAGTAGTAGGTATCAAAAGTATTATGATCTTCTGTGTATTGTGTCAAAAGAACACGACGTTTGGAACGGGTTTTCTTTGCTTGGAAAATCGCATATATTTGTAACAT	149	5	5		1
0046B	TAATAGGTGTGATAACATACGTGGAAATGGTACTAGAAAACGTAGCATTCGTGGAATAAGAAAATTTCGAACTCGCAGAAGAAGTGATAGCGATGCTAGTCAAGATTCATCATTAGAAACTAGTATTGAAGACGATGAGGAAGAAA	146	5	3	2	2
00160	TAAAACACTGGCCGCCGTCAATGCAATCCGCCGACACCGTCGCTGCTTCCACTCACCTACGCCACAGCCGACCGGGAACTGAGTGAGGGTATTTACGGCGGCAACTAAGTGATAGAGTGGGAGAAATTTGGGTGCGGAACCGCGGAGCTTTGGTCAGTTGGATGCGCGAAGGAGTAGCGCTCTTACAGTGGCCGGAGTATAGAAATTGTA	210	7	1	6	2
000E6	TAACTTCTCCAGGGGAAATAACGTCAAAAATCTAGCCGCCAGACCGGGAATCGAACTCGAGTCTCTCGCTTGCCGGACGATTGCTCTACCACTGAGCTACCCGTCCGCATAGACCCCATGACACTATCTCCCTCA	135	7	1	6	2
0015E	TAAATAGTCATTAGTCAAATTGAGCTATAGGTAGTCTAAGTACTAACCGATGTCCCTGACATGGAGCCTGTGTTTATCGACCGGCGTCTTGCTCCTGCTGCGACTGCGGCTGCGACTTGATCCCGAACGGCTTCTAGAATAGCTGCGTGATGTCCTACGGCTGCGCGAACGGCTGCGACTTCTGCTCTTAGAGCGACTATGGCTCTTGCTTCTCGACATGGTG	223	7	6	1	2
00314	TAATCAAACAATATCATTATTATACTCTGTCCTACAAGAGAGAAATAAATTCGCTCGGACGTTGCGAGGCCAAATTTGGCTCTTTGTATACAGCGGTTTGACAACAGTACGACGGCGATCGACAAATACCGACAGTAGAGAACCTTGGCAGGAATATGGTGGGTATGCGCGGAAATGAACGCGTTTTGGTCGCCGCCTAGTCGCTTTCTCTCCTAGGACGGAGTATAGTTTAGTAATATTGCAATATCAT	250	5	5		1
0042F	TAATCAAACAATATCATTATTATACTCTGTCCTACAAGAGAGAAATAAATTCGCTCGGACGTTGCGAGGCCAAATTTGGCTCTTTGTATACAGCGGTTTGACAACAGTACGACGGCGATCGACAAATACCGACAGTAGGGAACCTTGGCAGGAATATGGTGGGTATGCGCGGAAATGAACGCGTTTTGGTCGCTGCCCAGTCGCTTTCTCTCCTAGGACGGAGTATAGTTTAGTAATATTGCAATATCAT	250	5	5		1
000A2	TAATTACAGACAACACTACCGAAAATACCGCGAGAATTCCCGTAATGAACGACACAGCTCTCCATCATTTTCATAACTAAGACAAGGCATAAATAATTA	99	8	5	3	2
001A9	TAACGAATTGTATCGAGATGCAATGTCTACAGCAGCGTTCTTCCACGAACCCATTTGAAGAGCTAAGTGTGCCAACGCAACGCACAACTAAAACACAAACATGATTCAATTGAGTACACGAACAATGTTTATAAACAAATGATAATACATTATTATATA	159	6	2	4	2
00134	TAAAACATCTTATTGAACAAATTAGTATATGGACAGTATAACACTGTGTATTCCTACATGAATCCGACAAATGCGACAAAAAACAAAACAGTTTGTATTTCGTCGCATCGTATTGCGACGGAACAGTATGATCAGAATAGAAATCGTCGGATTTACGTAGGACATGGCGTAATGATAGATAA	182	7	3	4	2
0012D	TAACTTATCTATCATTACGCCATGTCCTACGTAAATCCGACGATTTCTATTCTGATCATACTGTTCCGTCGCAATACGATGCGACGAAATACAAACTGTTTTGTTTTTTGTCGCATTTGTCGGATTCATGTAGGAATACACAGTGTTATACTGTCCATATACTAATTTGTTCAATAAGAT	180	7	6	1	2
000F4	TAAAAGAAGACTATAGTCCGGCCCACGAGAGAGTATTACCGTTTTGCGCATGCATACTGACAGCAGAGACCGTTTCGAGGCCCTATTTCCCCCACTATTTCCACGACCGCTATACACTTTATAGCGTTGAGCGTAGCCAACCGTTACCGAACAGCTATCGGCAATGCCGAGTAGTGGGGAATGCGTGGAATCGGACAAGTTTTCGTCGGGCGACGGTAATACTCTCTCGTGGGCTGGAGTATAATACAACATTATTATTATTTTG	265	7	7		1
00355	TAACACTAAATATTCAATGATGCGTCGCAATGAATGCGTTTGAAAATATGCGTGTGGCGTCATAGAGCCGAAGTTGGAATGGCGATATATGTTTTACACGTACGAGTGTCTAGA	114	5	3	2	2
00395	TAAGAAGACGTCGCACCCGCATATGTTATGTTGTCTCTGTTTTATAATACAATAATAATATACACATACCTAATTTTACGCTCGGGAGATCACGTTTAGCTACGTTA	107	5	4	1	2
00466	TAACATTTCGTCTTTACGCTTGAATGGTCGCGAGCAAACACAACATGAAAACTGTGGCGGTGTTTGGCATTCGTACATCACATGTCTTTTGAGTACATATTTACGACTTTTTCCTTTATAACTACGTCCGCAGTCATTGGGACAGAACACAGGATCCAGAAGAGAGTCTTTATTGGTCGATTCGAGTAATTGTAGAAAATCTATGAAAACAATA	214	5	3	2	2
00386	TAATAATTTTTATAATATAATAGGTATACGGTATAGTATTGTTCAATACAGTATAAGCGGTATAGGTAAGGTATAAAACAAAAATTAGCGCCATGATCGGGTATCTCTTATCTTACCGACCATGGTCGGGCGTATAGACACAGCGAAAAACTTTT	155	5	1	4	2
001CC	TAACGGAGCTACACGTGTTCTGCTGAGCGTAAAATTTGCTAAGTTACGTCCTTGTAAGACGGAGACAACATATGCGGGTATCACGTCCTC	90	6	3	3	2
00095	TAAATTTGAATTCAATGATATAATATCACTGTATAGAAAAACGATTCTGA	50	9	4	5	2
003EB	TAAAGAAGAAACACTTGAAACTATTTCAAAAATTCAAAATTCTTCAACATATCTATACTCTATTCGGAACGAGATCGTACTTCGGCGGCGACCTGTTTTCGTTGGGCAGCGGTCAGACATATGGTAAGACGCTTCCCCCACCTAGAAAGCTCGTTGGGCTAGTGCTACGGAACGAAGCCACGCCTATGCGCAGAAGTTGGCCGCCGAGGTATGATCTCATTCCGAATAGAGTTTATTAGACTCAATTTCCAATTGATAG	259	5		5	1
0038D	TAATGTTTCAGAAGCATTTGAAAAAATAATAAAACAAGCTATATCACAAAATCATCAAGCACCAAAATTACTTCACGCAGATAAAGGTTTGGAATTTGAAAATAAACA	108	5	4	1	2
000AE	TAAGATTGAACCGTGTGGCGCTTGCAGACTGAGCCGCCAAATAGTCTCTGAACCCCTATGCGATGGCTATGCGTTCTGTGATTGGCCGACAGTCATTGTCGATCGTCGGCGTCAGTGCAAGCCGCCATGCATACGCTCCCACCGGAATACACGAAAAAAACGTGTTTTGATTGAGCGAGCGGTTCAAA	188	8	6	2	2
000F1	TAAGTTTGAACCGCTCGCTCAATCAAAACACGTTTTTTTCGTGTATTCCGGTGGGAGCGTATGCATGGCGGCTTGCACTGACGCCGACGATCGACAATGACTGTCGGCCAATCACAGAACGCATAGCCATCGCATAGGGGTTCAGAGACTATTTGGCGGCTCAGTCTGCAAGCGCCACACGGTTCAAT	188	7	2	5	2
0049E	TAACTAGATATTTTTTGCTCCGAGAAACCGCCTGTTTATCGTCGACACTCGACAACGATCGCAACAGTACGTTTTCGGTACCTACCAATATAATATATTATAGCGAAATATAATACGAACATGAAGTATCTTGTACACGTT	141	5	1	4	2
00341	TAAGGTGGTGTTGCATAGCAAGTCGGGGGTTATTTTCGATTTGCGGAGCGGAGCGACGGCGCCGAGGAACGCAGCGACGAGTGCTGCTAGCTGTGTAATCACTGCCCACATTATAATAG	119	5	1	4	2
0038C	TAAGGTGGTGTTGCATAGCAAGTCGGGGGATATTTTCGATTTGCGGAGCGGAGCGACGGCGCCGAGGAACGCAGCGACGAGTGCTGCTAGCTGTGTAATCACTGCCCACATTATAATAG	119	5	3	2	2
000B0	TAAGTTTGACTATAACATTATGTCATATCACTCTAACATATCAAGACTATAACGTTACAAAACTGGATCTACCGTGATCACATTTGCGTGTTGTTCGTTGTTCAAAGAGAGAAGACAAATGCCACACTGCCATA	134	8	3	5	2
00234	TAAGTTTGACTATAACATTATGTCATATCACTCTAACATATCAAGACTATAACGTTACAAAACTGCATCTACCGCGATCACATTTGCGTGTTGTTCGTTGTTCAAAGAGAGAAGACAAATGCCACACTGCCATA	134	6	3	3	2
00032	TAAAAATATGGCAGTGTGGCATTTGTCTTCTCTCTTTGAACAACGAACAACACGCAAATGTGATCACGGTAGATCCAGTTTTGTAACGTTATAGTCTTGATATGTTAGAGTGATATGACATAATGTTATAGTCAAA	136	13	6	7	2
002D3	TAAAAATATGGCAGTGTGGCATTTGTCTTCTCTCTTTGAACAACGAACAACACGCAAATGTGATCGCGGTAGATGCAGTTTTGTAACGTTATAGTCTTGATATGTTAGAGTGATATGACATAATGTTATAGTCAAA	136	5	2	3	2
003D8	TAACGACGGCAAAACTCGTACTGAACGTCGAACGATAATATCATCGGACGTCGATTTTACCGA	63	5	1	4	2
00093	TAAATCGGTAAAATCGACGTCCGATGATATTATCGTTCGACGTTCAGTACGAGTTTTGCCGTC	63	9	7	2	2
00101	TAAGTTATTTATTCGGTTCATACAGACATTATAAATGCAATAGAATTTGTAAACAAAATTTTATTATTTATGAATAACATGCTAAATTCAAAATAATAATCAACATACATATTAGCAATAGTTGCATAGGGGGACGGAGTAACTGAGCGGACTAAGGTGTCGGTTGTGATGTGCACCGACACCAGTTCAAAACCTCAGCTGTGGACGTCATCTTTATTTGGGCAAGTATGGTGTCCGTAGAAAATTTCCGCCATCCCGG	259	7	5	2	2
002F6	TAAAATCTTTTTTTAGTTTTATATTAGGTACACCAAAAATAATTTTTTATAACAAAATAGTCTTTATAGCACTTAGTACTTATACTTAGTGCGCCGAGAGAGCGCAAATCGGCGGCGAACAAAACTCGTCATAATCGGCGCATCTCCCACTAACGCTACTCCCACCGTGAGAACTAAAATGAAACAATAAAGTGATAATATT	202	5	5		1
0022B	TAAGTACTGGAGGTACAACTTCAAATACTTGTGATACTAATTTGAACAATGGATCATTAGGTAAATGTTTCAAAGCAAACTCGCGTTGGCAAGTGTAACGTGGGTCGGTTTTACGTAGCACAGCGTGTCCATATCCTGGTACAACTTGTCCACTTTTCAAT	161	6	5	1	2
002CB	TAAGTATAGGGGTATAACTGTATAAGTATTGTATAAATATAAATAAATAATATTGCATACTCTATGTAAAGAATATTCTTCATATACTATACTTATACTCAATGGATAGAAAATACTAATGTCTAATTATCTCGGGCCACCGAGAGAGCGCTACTCGTTGGCGCATCCAAATGACAGAGCTCCGCGTTCTCGTACTCAAATTTCTCCCACTCTACCATCTAGTTGGTGGTCACCGACAGTTGCGGCGG	248	5	5		1
0020D	TAAGTATCACCGAAGACGTCTGTGTGTAGGCGATCGTACGCCTGCTACCGTAATAACTCGTACTTTACCCGTCTCATCTGATGTTGAATCTGATAGTTCTGATGACTCTGAACCTGTTTACAAAAATTATGGGTCACGAGTACAGGGTCCATGGAAAAAAGTT	163	6	3	3	2
00253	TAAAAATTATTGGTAAATGCTATCCAAATAATAAAAACGCTACGACGCAGATCGTTGACAAAGTTGTTCCCTGTGCGTTATGGAATTTTGGTAATTCTACTATAAATACCGAGGAAGTGGTTTTATCCCGCCCAAAATAGCTTTTTGGTATGTTGTACATTTGTAAGACGGGGATAATGCATGCGGGTATAGTGTCCT	198	6	6		1
0021B	TAATACTTGATATTATGTAGTATATACTTGTTGTTCTAATAAACTTACATTATGTTTATGTAACTTAGAAAGAGAACGAGACAGGGGAGAAAGAGGAGAACGTGATAAAGAACGTGATAAAGAACGCGGTGAAAGACGGCGGCGTTCAAGATCTAGAGACCGTGAACGACATCGCAGACATCGATCAAGGAGTCGCGAAGGACGTAAACGTAGTAGATCTAAGTCGCCTAAAAATAAGTCTAGACGTAGAAAGCCATCTCT	261	6	6		1
00298	TAATATGTTATGTAATTGAATACCGTTTATCGTAGGAAACTTTGACTTCACATAATTTGCACAGTATGATTTGACCATCAGTTGAAAAAATATTCACCCTGAATTCACGCACATAATGACGAAGACGACTCGATAACGATGATTTATATTTTGGCATTTTGAAAAAAAAAAATAATAATAATAAAAACGCGAATTACACGAGCACACACATACT	214	5	4	1	2
0047F	TAAAATTGTCAGGGTATTGATAAACATAATTTGGCTGTCATATAGTATGCGGTCTACCGGAAAACGCGTTCTACAGGCTGTTGTCGGATGCGGTCTACCTACGACCGGCCGGTTTTTACACAGGCCTAA	129	5	2	3	2
00193	TAAAACAAATGTCTGCGGTGTCAGAAGGTAAATAGTAAAGTGTACTGTATTGTGTATACCAGTGGTCAGGAGCAGCGCGCTAATTGCAGCGACGCTACTTTATTTATAGCGATTGACGTAGCGTCGCTACATTACGCCTTAGATATCAAAATTCTAGCGAAAATTATCATTATTTTGTCGCTACCTACAATCTAATTGGTGATTA	205	6	1	5	2
00248	TAATAGCCCTATCCTAGGTTGGAAACTTCAAAACACTAATAAATTGGCCAAGGTTATGGTATTTTGGGTAATTACCACGATTATAAAGAACAGGTTAGACGTCGGTAATATGATTTGTACACGACTGCCCGGTCACAACTCGTTACAGTTTATGTAGTTGTAATAATATCCGCTAGGTTGGCGCTGCTAGGTAAACGGGCTATATGATAATGTTCTTTATAAACATGTAATATCAAATCTATGAGTTACTTGCATT	256	6	5	1	2
00481	TAAAAACGTTCAACACATAGATATTATAATCATATTATACATATACTCGGTTCAGCGATACCACGCCGTCCACCGACAAAAACTGGTTCCCCACGCAACACCATTGGGGAACTGGATTCAATAGCAAGGTGATGCGGAGAGATGTGTAGAATCGGCATGTTCTCTCGCTGAACAGAGTATAGATTCAA	188	5	2	3	2
002FC	TAATAGAGCAATACATATTTACTTCTATATTCGAGCCATCGTAAGAGCGCTTCTGGGCGCCGACCAAAATTCGTCTGTTCTCGCGCATTCTCGTGTATTTACGGCGGCAACTAGATGGTAGAGTGGGAGAAATATCGCAGAGCTCAATCAGTTAGATGCGATAAGGAGTAGCGCTCTTAGAGCGACCTGACTATTGCGTATATGATTTGATTTTGTT	217	5	2	3	2
00270	TAAGAGGACGTGATACACGCATGTGTTGTCTCCGTCTTACAAGTGCGTAACATGGCAAATTCTACGCAAAGCNGAACACGTGTAGCTCGTA	91	6	1	5	2
00387	TAAGACCCTCACTGGAAAGACCATTACATTGGAGGTGGAATCATCTGATTCCATTGAAAATGTAAAAGCCAAGATCCAAGACAAAGAAGGTATCCCACCAGACCAACAACGTTTGATCTTTGCCGGAAAGCAACTTGAAGACGGACGTACCCTTTCCGACTACAACATTCAAAAAGAATCTACACTTCACTTGGTGTTGCGACTCCGAGGTGGTATGCAAATCTT	225	5	2	3	2
00245	TAAGGCTAAGATCCAAGACAAGGAAGGTATCCCACCAGACCAGCAACGTTTGATCTTTGCCGGAAAGCAACTTGAAGACGGACGTACCCTTTCCGACTACAACATTCAAAAAGAATCTACACTTCACTTGGTGTTGCGACTCCGAGGTGGTATGCAAATCTT	162	6	2	4	2
003DB	TAATGTTTGGACAGGTAGACAGGTAGACAGGATTACAGAAAGGACTTGTTGTTTATTACAATTTTATTTACCATTGACAATTTGTTGTTCTGATCTATTAGTTTCTTGGTACGCGGGAAAATCCGCGGTGTTGCCTTGAATGCACTTGCTCATGCCGATATCAATGATTTGTTGCGTTGACAGAGCGTCAGACGGAATGGGTTCTAGCGATAAATCTAGCAGATTGTTAGTCACGTTGTTT	241	5		5	1
00343	TAATATCGGTATAGCGAAAGGGGCAACGTTACGAGTATGGCGTGCAGGGATCCTGAAATGAATATGTTGGAGGAGAGAGGGTGAATCGGTTTTCCCGCAAATTAGGTTTTGGAGGAAGAGCAAGTCGCGAGCAACGCGGCGATCTACCAGTGGAAGTAGATTCAACCTACGCGATACCAGGCCATAGTCATGTGGAGGATGGTGGATA	208	5	5		1
001CF	TAATCTATACTCTATTCAAAATGAGATCATTACTCGGCGGCCTAGTTGTGCGCATGGGCGAGGCTTTTTTCCGTGGCAGTGCCCAACGCGTCGCCGTAATGGGGACGGCGTCTGACTGCCGTCCAACAAAAACTGGTCGCCGCGGAGTAATGATCTCATTTTGAACAGAGTATAGTGAGT	180	6	3	3	2
000B6	TAACACTCACTATACTCTGTTCAAAATGAGATCATTACTCCGCGGCGACCAGTTTTTGTTGGACGGCAGTCAGACGCCGTCCCCATTACGGCGACGCGTTGGGCACTGCCACGGAAAAAAGCCTCGCCCATGCGCACAACTAGGCCGCCGAGTAATGATCTCATTTTGAATAGAGTATAGA	181	8	3	5	2
0032E	TAATAATATTCGTTGGTTTACGAACGATAATTTTACGTGATAACGTCATAAGAAAACATAGATGAAAAAATGCATACTCTTATGAATTGAATGGAATTATTATCACTGAATTATCATTATTTTGTATAATACAAAGAAGGAGTTACCGAAATAGCCACGACCGTCTAAGAATTTTGTATAGGCCAGACAACTATTCTATCTAAAAAGTCTCGATGACGAAAAA	223	5	1	4	2
00174	TAACTTCCAGTTCATTCATACCTAAATTTATCCAACATTTGTATAAGTGCAAGCCGCTATCAAATATTGGCGCCGAACAATTGTTGTTGGATACACATTCACTCAAAACAATTTTATTAGACTTGCCATCGATGAACCTTGATGATAATCGTAAAGCTCCGGCTAGGTAACATAAATCACAAAATAATGTTTGTGTCAACATTTGTAAAATTATTTTTGTGT	222	6	3	3	2
0035F	TAATTTGTCTTTTTTTCTTGGCTGTGCATAATTTTTGAATTTTATCAAATTAGGCACCAATATGGATTCAAGATTGTCGCGTGACTATGTGCCAATCGTGTGCTTCAGAATTCACCGTCACATTCCGGAGACACCACTGCAGAGCATGCGGCAAAGTATGTGTGGATTGTTCTGAATGA	179	5	4	1	2
002E2	TAATATAGCGTTAGAAAAAGTCATCAGGGAGAGTCGGATTGAAGAAAACGGAGTACGATTGGGAGAGTGCATAATAGGAGTATTGGCCTACGCGGACGACATAGTGTTACTTGCGGAAAATAAGGAAAATCTCAGGGAGCAAGCGGGAAAACTATTAGACACGGCAAAAAGAATAGGTTTAGAAATAAATGCTGAAAAAACTGAATACATGATCGTGCAGAGAAGAGAGCTCGCGGATCATGATCACCCATTTTTAG	257	5	5		1
0012B	TAAGTGAATGTGGCAAACGGGGCAAAAAACAAAACAGCTTGATTTTTGTCACTTTTGGAACAGCATGGTCAGAATACAATTCGCCCGCACTCTCCACGTTCGCTGCGATCACGTAGGACATAGCATCAGAGGACGCTACTTACGCATTTGTAGTCCATGTCTTACAAGTGCGTAGCATAACAAATTTACATTCATTTCA	199	7	4	3	2
002BE	TAACCGTTTATCAAACGCTCGTCTTACGTGCATAGTGAATAATCCCGAATCCGACCGAAGTTTCAAGTTTGTGTTTCGTCTTTTATGTGAATTGTTTC	98	5	3	2	2
002EB	TAATCAATGTGTACTTTTAGAATGATTTTGGTCGACCAGTCCCATCAACTATGCAGGAGCTGTGGAAGTATAGTTTTGATACAGGTGAATGGAAAATAATCAAGTGCCAAAATGTTCCTCAGGAATTAGTATCTGGTCCAACTATACTATCTGGTAACATAATTATTATAAATGGAGGTCCTGGAGTTCCATCTGGAGAATTTGGTTGCAACCGCATGTACTTGGGTAAGATTT	234	5		5	1
0014B	TAAATTAGACAATCTTTATATCATACCATCCAATTAGCCGATTTTATTGCATACAACTAAACTTTTATCGGAATATTTTCTTATCGAGCGATAATATTATATTATCGGTGGTGCGCGTGGCAGATTGTCGGACACTTTTAGTTGTGTTGCGTATTACGTCGAAGGTACCTACTGAAGGTGTATTTCACATGTTACGTCTCGTGTTACGTATATTA	215	7	4	3	2
0006D	TAAATAATATACGTAACACGAGACGTAACATGTGAAATACACCTTCAGTAGGTACCTTCGACGTAATACGCAACACAACTAAAAGTGTCCGACAATCTGCCACGCGCACCACCGATAATATAATATTATCGCTCGATAAGAAAATATTCCGATAAAAGTTTAGTTGTATGCAATAAAATCGGCTAATTGGATGGTATGATATAAAGATTGTCTAA	215	9	6	3	2
001C6	TAAAACTACGATTGTAGTCCTTCTATACTCTGTACAGCGAGAGAGCATGCCGATTCTGTGCATCCCTCCGCGTCACCATGCTATTGAAACCGGTTCTTCAATGGCTGGGTGTTGCGTGGGGAACCAGTTTTTATCGGTGCGCGGCGCGGTCTCTCGCTGAATAGAGTATAGGCATGAAAAGTGTTCAAACAAATTTTTTATAAAAACATTTGTAAATATTTA	222	6	3	3	2
00250	TAAATCATACACTAACGTACATACAGCACGGGGTCCGCGATGTACCGCAGGTAGATTGCCTACTTGATAATGTACTGCTGCAAATCAGAATTTTTATTCCGGGCAACGGAAAATA	115	6	4	2	2
00490	TAATGCCATAGATAGAGCTCTTTCCGAAACTTTTGGTTCGAATGATCCCTCTAATATCGATTTTATTGCCGCCCATGTTTCTAAATTACGGTATTTTGTTACTTCTAAAGCGTTTCCA	118	5		5	1
00132	TAATTTTATCCACAACAACTGTAACTCATCATATTATATTATACCATTATAAAATCTTTTATACTCCAGCCCACGAGAGAGCATTACCGTTTTGCGCATGCAGACTGACAGCGGAGACCGTTCCGAGGCCCTATTTCCAGGACCACTATACATCGTATAGCGTTGAGCGCAATCGACCGTTGTCGAACAGCTATTGACAATGCCAAGTAGTGGGGAATGCGCGGAATCGGACGAGTTTTCGTCGGG	246	7		7	1
00485	TAAAATCATTACAATTCAGGGTACTTTCCTGTTATACGAGACTATGGCTGTTATCGCGACTACCACCCAAGATTACCTCCGTTATCGCGACTACCGCTCTTATTTGGTGAAACACCACAATCCTGTTATCTAAGACTACCAAAAAGGCACTTTCCTGTTACTAGACTACCTAATTTTTCTTGCCTTCTTTGATATA	196	5		5	1
00406	TAAATTGTTGGTCGATGCCTGTTTCGCAAGAGAAGCGTTTTTCCTAGCTGATTTACTTTTGCGTCGTTTGTGGTCTTTTTTAGAGTCAGCTACAACTGTAACTTTTGACGATACAGTCGTTGGTGTGCCATTACTATTGTCATCGGACATTTCGCCAGCACTGCTTTCTGACACGCTGGTCTCTTCGCTTTCTGAAACCACATTTAGCGGCCCATACGCTCTGTCTTCGGCTTCAGACGCTTCGCTTT	248	5	5		1
00379	TAAAAGTTACACTATGATGACCATTATAACTTATAAGGTAGATGAGTGCTCGCAACTGACTTAGGGGTATGTCATTGTTTTCAGCAAAAATGAGTACAATCTATTATACAAC	112	5	4	1	2
001E8	TAAGTCCTAAAATTTGCTAAAAAAATACAAACAATTACAAATAAAACTTATATATTTTGAATTGTTGTACAATGACACTAATAATTTGTAGCTTGATTAGCATTATATACTATACTCTATTCAAAATGAGATCATTACTCGGCGGCCTAGTTGTGCGCATGGGCGTGGCCTTGTTCCATGGCAGCGCCCAACGCATCGCTGTAGTGGGGACAGCGTTTGACCATATGTTTGACCGCCGCCCGACG	245	6	1	5	2
00436	TAACGCATCAGTGTTGGGTCGCCGGCGGGCTCGTGGCAGTCAACGT	46	5	1	4	2
003A1	TAATCATCCGTAAAATTCCGAGCCCCGATGAATCACACCGTTATCGCGCTATTTTCGATAATTATTATTATATAACCTAACCATGGGGGTCGCGATAGATTTTTGGAAGAAAATTTGGGTCGCGGTCCTAAAAAGATTGAGAACCACTGCCCTAGATCAATTAGCCAAATTTTACTGAA	179	5		5	1
0039F	TAATTACTATTTATTTTGCGTACGGGTACCCTATACCCTGTACCAAATAAGAGCGCACCAAATTTACGTAACTAAACCGGTTTTGCCCGTGGCCGCCCGGTGCGCTCTTATTTGGTACAGAGTGTAGTTTCATTTTTGTAGAAGAACATATATTTTTATGTTTGTTACTCACAAGTCAAGACGTTTATTGAAAATTTGAACAAAACATACTGACTGATGATGATAATAATAATAATAAAT	240	5	4	1	2
00262	TAATAATCATCAATTAGATTATAGGTAGCGACAAAATAATGATAATATTCGCTACGCTAACTGGAAATGTTTAGGGCGCTATAGTATTTCACTATCTAAGGCATAATGTAGCGACGCTACGTCAATCGCTACATATAAAGTAGCGTCGCTACAATTAGCGCGTTACTCCCGACCACTGCCTAATAGTAAGTGCAA	195	6	4	2	2
00300	TAAGTCATCGAATCCGTCGAGCTGATCGCGAGCCGCTTCCGTCCGATTATTGTATTTTGATTGCGCGACGCTATGTACACCGAGCCTCCGACCGGCGCGTATTGCCGGGGGCCGTTCGTCGATATTATATCCGTTTGCCGTTCGGTCGTCGCGAATCTCTAGTGGATATGTCGCTTGCCGAAGCGTTCGGGTAGCTTCT	199	5	3	2	2
00256	TAACTCGATAGTCAAAACTAGTTGGTACTAGACGTGTATTACTATTTACTACCGAATGAAAACTATCGATAGTCAAAACTAGTCGGTGTAAGACGTATGCAACTACCGAAAGAAAACTCTCGAGTGAATTACTCGATAA	139	6	5	1	2
0003B	TAAAAAGAACATATTCGGCTAACGTTGCCACTGAACTGCGCTCGGACAAAAAAATCGAAAAAACACCCAACACGAGTTCCTCCGCGTAGCATTATAGTGTTACGCACATGCGTATAAACGTAAAATCGCAAAAACTTTGGATGAATATAACTTCAAAAATCATGGTTTCCGCAAAAAAATTCAAACAATTTCGAAATCAG	200	13	6	7	2
00272	TAATATCAGTGTTATCTTGTATATTGTAATAATTATATTTGGAAACTCCCATTATCGGAATGCAGAATATTTGATGCACCGAAAGTGAGAAAAATTGGCAGTAACATGTGGGCTATTTCCTCTGCTGTCTTGCTCTTCAATGGTCTAAATTTAGTTAGATGCTCTTGATAATTGAGAATAAATTTATACTCACTGTCTTTACACGTTTGCATATCGACTAAATCAACTTGACATCG	236	6		6	1
00429	TAATATAATAATATCATAATGTCGTTTGTGCGACGAAAACGTGAAAACTGTTTCATCGACGAACCGAAGTCTTGTAGGTACGTATACAGTGCGCACAATTTCACTACGACGTACTGTAA	119	5	5		1
00368	TAATGATAAATATTGTGCAAATGATGTAGTTGATGTCTGTGTGCGTGATAAACCGCAGATGCATGTTGCATATATATGGCGGCTGCTTGGGGATTAGCACCGCGTAGAGCGATGGCCTGTTGCATAGGCCACTCCGAGAGGCGGGCGTGATCTCAGTAACCCGATGCTTCTTTATACTCAGACCCCTCCATTGTGAAGAAGTCTTCCAGTTTCC	214	5	3	2	2
0035D	TAAAAATGGTGTGCGATACGGTCGTGCGTATTAGAAGGCGATAAACGGCCATACAGGTCATTCCAAATATGGTATTATATCTAATAGACGTTATGATGCAACAACTCGCAATTATTGGCGCGCGGGTACAGAAGGAATGCTACCGTGAGTGGAGTTTACTATCTACGCTGTAAGACGCGTATCACCATTCAAAATTACCTCAG	203	5	3	2	2
00280	TAATGCGTGGCGACCAGTTTTCGTCAGGGGGCGGTCAGACATATGGTCCGACGCCGTCCCCACTACGGCGACGCGTTAGGCACTGCCACGGAACAAAGCCACGCCCATGCGCATAACTAGGCCGCCGAGTAATGATCTCATTTTGAATAGAGTGTAGGTATAGATTGGTTATATACAA	178	5	2	3	2
003A0	TAATAAAACGAGTGACGTTCACTAAAAATGAACGTGAACGCGCGAATGTGCGTTCATGAACGACGTTCTTTCCAAACACTGGTATCTACATATAATTATATAAGTATAAACTTATAAAATACAATACTTTGTATCATGAAATATATCATTTGGTGAGGAGGTATGTATAGAATAATTTTTAGTTTTCTGTACATAAAAGAAGATGGAGGCA	211	5	2	3	2
0027C	TAATAGATTTATCGCGGCACACTCCAAGGGTGCTCGCGGCACACCGGTTGAAAACCACTGCACTACAGCATTATATCACGGCATAAATTGTAACCTTCCATAATGGCCATTGTGCATTTGTACCATTCAATTGTGTTCGCACGAATTATGCAT	153	5		5	1
00185	TAAGTTTACAACAATATTATCTATACACTTACTGCTTTTCCAAATCATCGACCATATTGTCAATTCCTTCTTTAGAATCTTTGACTTTATCGTGCAAATAAGTGTTGGCCTCCGCATAGAATGCGTTGCCCAGTCTATCTTTTTGTCTTTGATATGCGCCCATGTCTACTTTCATGTTGGATATCATTCTGTTGTATTGGCGAGCGGTAGCTTCTTCGTAATCCGAGAACCCGGGATCAGGATTTTG	247	6	6		1
00293	TAATATTTGTCGACGGGTAGTCGACACCGGCGACCCGCGAAATGTTACCGATGTCGACTACCCGTCGACCGTGGCATTGAACGTGCTAGATTACATACATAA	102	5	4	1	2
002EC	TAATGTTGGTCCTAAGTCTGGTCGTAATCATGAACTAAGAAGATATGGACTGGTCACGTGTACCCAAACACCGGCCAGGAAATGTTATGGGTACAAAACTATGCGACAGTAACGCACTCGAGCGGAGTACATATACAAGTTGACAGTATTATTTATATTATTTGAATCTTGAATCTTATGATTCAACAAGTACATTGTATTTA	203	5	3	2	2
00172	TAATAAAATTTGGTTTACCCATAATGACCAAGATCAGTAAGATTTTACTCTTAGTGGTTAGAGTAGGATGTATACTATGTGGATAACTAAAACGAACATCTATACGGCCGCGACCGAGATACTGCTACTGGGCGGCGACCAAAACTCGTCCGATCTTGCACATTCCCTCTACTAAATCTTCCCGTATGCTGGCCGTTGCTACAACTATATGGTAGAGCGGGAGGAATTTGGGTATTAGAACGCGGAGCTCGGTCATTTGA	260	6		6	1
002C7	TAACTACTCTATTCAGTGAGAGAACGCACTGCGCACCGACCAAAACTAGTTCCCCCACGCAACACTCTGCCATTGGGGAACCGGTTTCGGTAGCATGGCGACGCGGGGGGATGTGCTGAATCGGCGCTTTCTCTCGCTGGACAGGATATACCTACCTAAATCATTTA	167	5	1	4	2
002E3	TAAGTTCATACGCGCCAAACCGGCGAGGGAAACGCGCCATTGTCGGAGTGGCGCGTATGAATTTGACCAATGTAAATGAAAATGCGCGCGTACAATACGTCGCGTATGATACGCGTCCATGTGAAACGGGCCTAAGTGTACA	142	5	2	3	2
0025A	TAATAGTTTATAAATAAACAATAATAAGTAATAACATTACTTTTATGGCACGTTGTCACTCGACAACCCTCGTCGTTTTCGAGTATCAGTCAGTTGTTCTCCTGACAATTCGACAAACAACAACCCATAGACGCGATAAAAATAGATCTTATGGAAAAA	159	6	2	4	2
001EE	TAAAAAAATCAGAGAAAATAGCAGTGACTGCTACCATAACTGCTACTTTTTATTTTTCACGAACCTATGAGCTATTCATATTCACACATCACTCTAACGGAATAATAGTATAATCCAGAAATCTATGCATGAATATACGTGATACTATATA	151	6	5	1	2
003D9	TAATTTACATTGGTCAAATTCATACGCGCCACTCCGACGATGGCGCGTTTCCCTCGCCGGTTTGGCGCGTATGAAC	76	5	3	2	2
00238	TAATTTACATTGGTCAAATTCATACGTGCCACTCCGACGATGGCGCGTTTCCCTCGCCGGTTTGGCGCGTATGAA	75	6	4	2	2
000A3	TAAAATATGGCTTTGTTTATGTTTAGAGACGAGCTCATATGTTTACTATGTGTTTTGAAAACTCATCTCGACTATGGTTTCCGTGTGTCGATAGTTATGCGGAACCATGTACATGGGATTTAGAATTTACAGTTGATGAAAATATGACGGCAGTATCTTGTGGAGA	166	8	5	3	2
003C3	TAAGTGTTGCACGTGTTATGTCAATCTTACAAATGTATGACCATTGATTATAAATACTATAGATCGTTCACTGGCCCGTATTTACGGAGACGACAGCGCTTCATAACAACCACATCCATTTTTCGTCAATATTTCGTGTCGCGTAAATACGGGCCACTAAGTGATCTATAATATTTATAATAATCAATGGTATGACATATAAAATTTGTGTTCAATGTGCAATAACCTTT	230	5	3	2	2
003AE	TAACACGTTGAATGCCGGTGTCAACCTTTGGTTTACACGAGTGAACAGACTCCTATAGACAGTGTCAACCCGTGGTTGGCATAGAGTAACCTATTTTGTATTGGGTCTTTTTTGGTGGGTATAGCTGAACACATTTGAAATTTCTATCAGACATTTATTACCGTATTGACAATTTCGTAAAATCTACTAATTTTACAATTGGCGACGGTCGCCCGCAGATCAAATCACGTCGGGCGTGAGCATGTCAAATCGACGTCGGCGTTCAACG	268	5	5		1
0034E	TAAAACATATTTTGCCTATTGGCAATAAACTATGCAGATTGATTTTTACAGCATCGGTTAGTACTGCATCAAACGAGCACACGTTCAGTAAATTGAAGATTGTGAAGAATTGTTTACGTTCTATTACGGGAGTAGATCGCTTA	143	5	5		1
000B9	TAAAAAGACGTTGAACCCGCATATGTCGTCTCCATCTTACACATGTACGGCGTAACAAAAACGTTAGCGCGCAGGAAAGAACCGAGAAAACCAAAGCCATAGCTAAGAAACAAAATTTTCACCACATAAAAAGGAGAACTTTGGCCGTACAATATCTTATTTATTATTTTGATATCATTTATATGAAAAATGTA	194	8	4	4	2
0021C	TAAGAGGACGTCGCACCCACATGTGTTCTCTCCGTCTTACAAATGTAGAACATAGCAAAAACTGTTTTGCACGGGAAAGAACCGAGAAAGCTACGGTGATAACTAAGAAATAACATTTTCACCTCATAAAAAAGGAGAGCATAGCCAAAGCAATATAGTATCGAAATCGGAACTTCAAAAAAAGTTA	187	6	2	4	2
003D0	TAATAATTAGTTATCGTGAACCCAACCGCGGATAATCGAAACCGCGGATAAAAAACGCAGATAACGAGGGTTTACTGTATGTC	83	5	2	3	2
0042E	TAAAAAGACATACAGTAAACCCTCGTTATCTGCGTTTTTTTATCCGCGGTTTCGATTATCCGCGGTTGGGTTCACGATAACAAATTA	87	5	3	2	2
00079	TAAACAAAAGGCTACGCTAATGCAACACGAGCGTATTCATACTGACTCAAGACCATTTGTGTGCAGTGATTGCGGTAAACGGTTTCGTCAACAGTCTCATCTTACGCAGCATGTGCGTATCCATGCTAATGAAAAACCATTTGTATGTGTTTACTGTGAGCGAACCTTCAGACAGCGAGCAATCCTCAACCAGCATCTACGGATTCATTCGGGTGAGAAACCGTACGGGTGTGG	234	9		9	1
00372	TAAGATTGGTTTTATTATTTCTCGATATTAGAGGACTGAGGATGCGCATACGGGCGTTGAGAGTTAGTCTTTTGGTTCGTAAGTGATTTTTCCATGTTAGTCGTTTATCAAGATTGAGTCCCAGGTATTTTATTGTGTCCGATGTGGGGATTGGGATGTT	160	5		5	1
002ED	TAATATCATTATAGTCTGTTCAAAATGAGATCGGTACGGACGGCCAAATAGTGCGCATGGGCGTGGCTTTGTTCTGTGGCAGAGCTCAACGCGTCCCCGTAGTGGGGATGGCGTCTGACCAATGACCATATGTCTGACCGCCACCCAACGAAAACTGGTCGCCGCCGTGTACCGATCTTATTTTGAACAGACTATAGACACAGAAA	206	5	2	3	2
002AF	TAACGAGGATAGTGCGCAAATATTGTACGCAACATAATTATTCCAAAGTATGGACGATGTAGACGAGCCAGACGAACGAGAAGAACTGTTCTATAATAATGTTAGAGAGAAAATAGTGAGTACTGTCTCAATTTTTTA	138	5	3	2	2
0042C	TAAAGCACTTAGGGCGCCTAGGGGACCATGGTCCACGAGAGAAGTAGACCGTTTTACTCGTGTGAACTCATGGCAGTGGCCATTCTGTGGCTCCGTTTACCCCACTATGTGACAGTCGGCCTAGACACATGGTAAATAATGCACCCGCGTCCACTGCGTGCGTATTGTCGCCGACAGCACTCTGGTTGGTAAAGTGGTAGTAGAAATGCGCGGAAAAGCCCAGTTTTGGGTGGCGCCCGGCAGGCCCGGACTGGG	255	5		5	1
000B5	TAATTAACTACCGCTTTTAGTAGTTTTTATAGTTATGCGAACAAGAAAATATTTCATCGCGAAGTATTGACATGTGCGGGCGTGTGCGAGATTTACATTACAACAATTTTTGGAAACACGCACTAATGATCATTTACTACTCACACACATAGCCCAAATGTTCATGTCATGTGAATTGCCTAAATATCACTCCTTCAAACATAATACGCTGGAG	214	8	5	3	2
00277	TAAATAATATATCTCTTCGGATGGATGCGGACGGACGGACGTTCAACGAAATAGGTCCCCAACCAAGCGCGCGCAATAAAGTTCTCACTATAAAAATTGTTTTCCCTCTCTTATTTTGAAAAAAATATATGATTTTTCTATTTTGACCTTTCAAAAGTACCAACTAAAAAA	171	5	1	4	2
0045E	TAACTGCGTATGTGTATTTACGTACCCGTAATTACGATAACTGTGCAGACGCCAGATAATCACTATAATAACGATAATCGTTGCGATAAATTTGAATTTTTATCTACGATAACAATTATTATACGTTATAAGGTACCAACAGGAACTTGAAATAATCATCACAAATATTA	170	5	3	2	2
003F3	TAATACAAAGATAAAATTGATCAACAAATATTATTTCTATTACCAATTTTTGCAAATATCTTTCACGACGTCTTTCAACCAACAAGAATCCTTCTTCGACCAATTTCTTGACGAGATCCTCTTTTTTGTCGGCATCTTTCACGGTAATGTGAGTAAGATTGTCGTAAGTGTACTCTTCATTGATGTTGATTGTCTT	196	5	1	4	2
002D4	TAATTTAGGTAAGTGATAAATTCGTTTCAAGGGATTTCCATTGTAATGAACTATATTTTATTTTACATATTTTTACATATTTTGTCATAAGTTTATATTTTTACATATTTCTCAATAATTCCATTTTTCCCTACATATTTCGACAATTTACGATTTACGATGTATACGATTTCCCATGTTTCAAAAAGTACGTAAACAAAATAATACCAATTATTGAACTAATCGACCGTAATCTACGGTCGATATAATATTATGTTCGATATTTGTGACATCGAT	276	5	5		1
002C0	TAAATCAAGTAACTTTGAATGAATTTCATCCATTACCCAACATCACGGAAATACTCGATCATTTAGGACAATGTCAATTGTTCAGCGTGATTGACCTTGCTTCAGGTTTTTACCAGATTCCGTTATCAAAAGCTTCACGAGAGCTTACAGCTTTTTCTGCTAACAATGCACACTTTCA	178	5	2	3	2
0020B	TAATTCTATAAAAGTAATGTGTAATATAGCACATGGGTCATTCAACAACCAACTTCAAAGCCATTCGATATATGAGTTTTTCCCGAGTGGGAGAACAGGAACAAAGGTTGTTCAATCTCCGGTAAACCTTATATATTACAGA	142	6	3	3	2
00475	TAATACTATAAATCGCTCACTGTCCCTTATTTATGCGACGCAAAATATTGATGAAAAATGGATGTGGCCGCTATGAAGCGCTGTCGTCGACCATTAGTTACTTATGGCTGACGACAGCGCGCCATAATGCCACATCCATATTTTGTCAATTTTTCGCACCA	161	5	3	2	2
00224	TAAACGATTATGTTACGACAACAAAATTATACTAGCACCCATGGTCAGGATAAACACGCTACCAATGCGTTTATTGGCGTTGGATTATGGAGCAGATATCGTGTACACAGAAGAATTGATCGATCATAGGCTGATTAGATGTTATCGAAAAGTAAATGGTAA	162	6	4	2	2
00151	TAAACGAGATCTGCTGAGCGTAAAATTTTGATATGTCGTAAGACGAATACAACATATGCGGGTGCGACATCTTC	74	7	6	1	2
002A5	TAAAAATACATTATTTGGTAGGTATACTCTGTTCAGCGAGAGACCACGCTGCGCACCAATGAAAACTGGTTCCCCCACGCAACACCCTGCCATTGGGGAACCGGTTTTGATAGCCTGGTGACGCGGAGGGATGCGCAGAATTAGCGTGCTCTCTCGCTGAACAGAGTAAAGGTAGGTATGCATGACTTTATCAAAGTAAA	200	5	2	3	2
000FF	TAAATTATACTCTGTTCAGCGAGAGAACGCGCCGATTTTGCGCATCTATCCGCGTCACCATGTTATTGAAACCGATTCCCCAATAGCAGGGTATTGCGTGGGGGAACCAGTTTTTGTCAGTACACAACGCGGTCTCTCGCTAAACAGAGTATAGAAATGAACATAATTTAGTA	173	7	6	1	2
003A8	TAAAATACTAAATTATGTTCATTTCTATACTCTGTTTAGCGAGAGACCGCGTTGTGTACTGACAAAAACTGGTTCCCCCACGCAATACCCTGCTATTGGGGAATCGGTTTCAATAACATGGTGACGCGGATAGATGCGCAAAATCGGCGCGTTCTCTCGCTGAACAGAGTATAA	174	5	5		1
0001C	TAAACCAACGGAACTACACGTGTTCTGCTGAGCGTAGAATTTGCTATGTTACGCACTTGTAAGACGGAGACAACACATGCGGGTATAACGTCCTC	95	16	12	4	2
00028	TAAGAGGACGTTATACCCGCATGTGTTGTCTCCGTCTTACAAGTGCGTAACATAGCAAATTCTACGCTCAGCAGAACACGTGTAGTTCCGTT	92	15	9	6	2
001A6	TAAGTAGAATTTACTAGTGATGGGCAACGATATCGATAATTCGATACAATATCGATATCGTGATAAATTATCGACATCGATATTGTTTTGTATTGTATGATATATCGTGATATTGAAAATAATATTTTTCAAGAAAATTACATGGTATTTACTATTTAGTATTTAGTATTTACTATTTGTA	181	6	4	2	2
002CD	TAAGAAATCTATTAGTATTATGTACATGAACGATACACTTTTCATCTTTATAAAATATACTATACTCTATACAGAATAAGAATTCCCACTTTCGTGCAAGCACCTGAATTGCCGGCAGCTGTCAGACCCTCCCTGGCGAGTGTTGGCTGCGCTGTGATTGGTCGCCAGTTGTCGACGACTGCCGTCACCCGTCGCTATTGTATACGTATACACCTGCGGAACGTCGGCAGTGGCAACG	238	5	3	2	2
0037E	TAACAATATCTTCGGGAATGGTCACGTTCAATACACATAAAGGTGATTGAGCAGGGTCACCTCGATTTACTTTGGGCTCACGCATGAACAGAATCCGTGCGACATTAGTATCTTCCAGGTCACGAATGCGAACAGTAAATGGTAAACGATTTTCACGGAAAGCAGTGAAA	170	5	2	3	2
0006A	TAACAACGCAAGTGTTATGAACCCCTGTCTTTAGGTAGTAGTTTTAGCTTACGTAGCACCTGTCGACCGCCGTCGCGAAATTATGTCTAACAATGCGACGTCAGTCGAGTGTCACACGTCGAAACCATAATA	132	10	5	5	2
000FB	TAACGTATTATGGTTTCGACGTGTGACACTCGACTGACGTCGCATTGTTAGACATAATTTCGCGACGGCGGTCGACAGGTGCTACGTAAGCTAAAACTACTACCTAAAGACAGGGGTTCATAACACTTGCGTT	133	7	2	5	2
0038A	TAAGTCTAAAGCCGCGTACACACGTAACATTTGCGCGTAATATCCTTTGATGCGGCCAAATTTACCGACAACTGGTGGAACGGTGTTACGGCGCTGCGGTGTAACAGAAAATGTTACAAGTGTGTACGCGG	131	5	4	1	2
00206	TAATGCGGGCATTGGCCGCCAGGAGCACTAAGAAGGCCGATAAATAATTCTGTGTAGCGGTATACGCA	68	6	4	2	2
000CC	TAACACGTTGAGTGCCTCGTAGTATTTGGCGCACATTGCCCGAGAATCCGCGTGAAATCGGTCTTGGGAAAAAATAACCATTACTTTGCTAAAAATAAACGAAAATAAAATCCGAATACACCGTTGAAAAGAAGACATTTCACTGAATAACCACTTATAAAAACGGGAGAATTGCTCCGATAACCGAGTAAATTATAAGGCCATAAAAATGCCTATACAAATTGTCGACCGCGGCCTCTGGGGCAACGCAACTGTTGTCGACTACCCGTCGACCGCGGCACTCAAGG	287	8	8		1
00469	TAACACGTTGAGTGCCTCGTAGTATTTGGCGCACATTGCCCGAGAATCCGCGTGAAATCGGTCTTGGGAAAAAATAACCATTACTTTGCTAAAAATAAACGAAAATAAAATCCGAATACACCGTTGAAAAGAAGACATTTCACTGAATAACCACTTATAAAAACGGGAGAATTGCTCCGATAACCGAGTAAATTATAAGGCCATAAAAATGCCTATACAAATTGTCGACCGCGGCCTCTGGGGCAACGCAACTGTTGTCGACTACCCGTCGACCGCGGCACT	282	5		5	1
00459	TAAAATAGAAAAACAAAGGTTTATGGATGGTGAAAAGGATGTAGCTATCATATCAGAAGCTGCCAGTTCCGGTATATCATTACAAAGTGACCGAAGAGCCCGAAATCAACGCCGTAGAGTACACATTACCTTAGAATTACCTTGGAGTGCTGATAGGGCTATTCAGCAATTTGGTCGTTCTCATCGTTCTAACCAA	196	5	4	1	2
00338	TAATTAGTAGTTGTAAATATATATATCATCTATCTCCGTCTGTGGCTCGGTTCTTCATCATCAGCAACGATAGTAAGTTGTCCACAAGCGTGCTGCAATGCTTACGACGACATTTTCATGTTATCA	126	5	1	4	2
001FD	TAATATTATATTGTATTAGGTGTTTGAGCATTGTGCAACGTTTTTGTCAGATCGACGGTTGTAGAACGTTATTCGCCGTCATAATCTACCACACATCGTATGTCTTGTGTATGCTGTATGTATGAACTCTCCTCTTATACAATGCAAT	148	6	4	2	2
00266	TAAATATTACTATACTCCGGCCCACGAGAGAGTATTAGTGTCGCCCGACGAAAACTCGCCGAATTCCACGCATTCCCCACTACTCCGCATGACCGATAGCTATTCGGAAACAGTTGGCTGTACTCAACGCTATACGTTGTATAGCGGTCGTGGAAATAGTGGGGGAATTGGGCCTCGGAACAGTCTCCGCCGTCAGTCTGCATGTGCAAAACGGTAATACTCTCTCGTGGGCCAGAGTATACAGATATTTTATT	254	6	6		1
00190	TAATAACCATCAAATGCCGCCGTCGAACGAACGGGAATGACCTAAAATATATATAAATGCGCGGCAGTACCTAGACCGCATATGGCGTGTAGAAACATACCTGGTAGACGACAAGTGTGCGGTAGACCGCATACGACATGAATACTAATATTTGTTTGCCA	161	6	2	4	2
00356	TAATGCGTTGTGTGTGCGCACCACTGGCGGGATTGACAAAAAATTGGGAATGATTGACGGTTTTATATATGTACCCTTTATTTTCTACCGTTTTATATGCAAGCCATTCATCCGAGTGTATTTCTGTACCAACTTCAATTGAATTATTTCAAG	153	5	4	1	2
00091	TAAACGTCTCCTCCCCTTTATTTTTATGTAGGTTTTAGAGCGCGAGCTCTTCCGGATCATTTTCAAATATTTTTTCTAAAATATAAAATTACCGGTTCTGCCGTCGACCGTATACATGTCTAAGTGTAGGGTCGCGCAGTACTCACTTTCAAAATTCATATCTCGAAACTGGTCAAAGAGTTCCCTTAGATA	192	9	3	6	2
0036A	TAAACCAACGGAGCTACACGTGTTCTGCTGAGCGTAGAATTTGCTATGTTACGCACTTGTAAGACGGAGACAACACATGCGGGTATAACGTCCTC	95	5	3	2	2
00208	TAAACCGGGGCCTCGTCCGCAATTGCGGACTAGCGGTCCGGGCCAGTCCGACTCTGACAAATACCCTCTTTATACATAAATGTATACTTACTAGTTAGTATCAAA	105	6	6		1
0046F	TAATAATGAAACACAAGAAAAATGAAACCATTCTATTGGACATGAATCATTATCGCAACATATCATCTCTCCGTACGAAATCTGAACACAAAGACAATAGGTTGGTTCATCTGGATCGACAGCTATATCCCTATTTCCCTTCTTTTGGATTTTTGTTTCTGGTTTTTGAGCCAATGTTCTTTTAGTTCTAGGCCTTCGAAGGCCGATTGTTGTCAGAATTGCGCCTTTCGGTCGACCACATGTTCTAACTTT	252	5	3	2	2
00080	TAAATAAATTTTCAATTTCGCCTATTGAATAAATACCTATAGATATTGTACCTAGTGGGATTTGACCATTTCGACCTAATCTAAATTCACATTCTTTTTCAATATTTATATAATATTCACCATCAATAGGATGATACATTTTTTTCTCACTTGTCATTGAAAAATCAAATTCACTGTTTTCGAAACCTAAATA	193	9	5	4	2
00283	TAATTATTATCAACATATTCTATTAGTAAAAACAAAGAATTTGTTATTTGGTTTATGACTCATACTTAGGGCCGTTCTTACGATGTACGGTAAAGTGTCGATTTACACTAACCGACTGATAACAGATTTTTTTACCGGCAGAATTCGGCCGGTTAAGTGT	160	5	5		1
00186	TAATAAAGCAATACGTTTGTATATTGCTTACTTGTATATTTTTGAAAGGTTTGATGCAAATTGTGGTATGTCGGAATCGGATAATATTTGTATTATTTGCTAAGTAAAAAAATACAGATGTACTTCACACGCATGAATTATGACACTTTATATACATATGGTAACTTTTAGTTGA	175	6	6		1
0025F	TAATGATGAACAAGAAGTCATCATTGCTCCATTTTATGCTCGCTTAGCAATTGGTCTACGTTATGTATGGCCACGATTTTATTTTTGGATTATGAAATGTAGGGCTGACCGGCAAGCTAGTCAGAAAATGTAGGATTCAAGGATTCCCCGCCATCAGACGGACGAGCGTCGGCTACAGCCCGTTATCGTCGGCATACGGGAATCTCACATTTGACAAACAGCCAGGTCAGTC	232	6	2	4	2
0004A	TAAACAAAAATATGGAAATAGAGTTAGATTGTTATATACAGATACAGATTCACTTATATTAGAAATAAAAACTAATGATTTTTATCAAGATATGAAAATTATGTTAGATCATTTTGACACTTCAGATTATCCAAAAGATAATATTTATGGTTTACCTTTA	160	11	6	5	2
00279	TAAGACCACGAAGACGTTTCGCCTTATCAGAACGTAAATGAGGCTCACGAGCTTCCTTCTTACGCATACGTTGTTCATAATCCATACGGCGACCGTATAATTTACGGTGCCGTTCCATATACTCATTTTGTGGCATGATTTATTTTTCTGAAAATAAAATAAAAATATGAATAAAATTATAATATAACAAAATATAATTTATATAAATTTTGA	213	5	5		1
001C0	TAAAGTGGGTCATACACGAAACGATCCGTCGTCGATACGTTTGTTGCACCTCTCGACGCAAAAACTATCAGAGATCA	77	6	1	5	2
002E5	TAAGGTAAATGTCAGGATCAATATCTTAGTTCATAATAAGGAGTATTATAGCATGATAATTTGTTCACTATACTTTGCCTAGTAAGATAACGCGCTGAATCTGCGCATCCATTCATCCCGCGTCACCATGCTATCGAAACTGGTTCCCCAATGGCAGGGTGTTGCGTGGGGAACCAGTTTTTGTCGGTGTGTTCTCTCACTGGACGGAGTATAGGGTAATACATATTTT	229	5	3	2	2
002A6	TAAATTTTGTTTTCAGACGATTTTCGATTGTTTTGTGGGGATTTAGGCAATGATGTCACTGATGAATTATTAGCTCGAACGTTTAGTCGATATCCTTCATTCCAAAAAGCCCGTGTAGTACGTGATCGCCGCACTATGAAAACCCGAGGTTTTGGGTTTGTATCGTTCAAAGACCCAGCAGACTTTA	187	5	3	2	2
000B4	TAATACGGCGTGTAACGCGACGAACCACGAGATCCCGAAACTCTGACGGAAAAAGAAAAACATAATCGGGGA	72	8	2	6	2
00421	TAATTAGTGGCATGGGACTAATACTCTAAATATACTCAATAATAGAATGTACTCTATTCAAAATAAAACCGTGACCAGGCGGCCGAGTTGTGCGCATGGGTGTGACTGTTCCGTGGCAGCGCCTGACGCTTGCCGTGTCGGGACGACATCTGGCCATATGTCTGACTGCCGCCCGACGAAAACTGGTTGCCGCCTGGTCACGGTCTTATTTTGAATAGAGTATAGATT	228	5	1	4	2
002AB	TAATCTATACTCTATTCAAAATAAGACCGTGACCAGGCGGCAACCAGTTTTCGTCGGGCGGCAGTCAGACATATGGCCAGATGTCGTCCCGACACGGCAAGCGTCAGGCGCTGCCACGGAACAGTCACACCCATGCGCACAACTCGACCGCCTGGTCACGGTTTTATTTTGAATAGAGTACATTCTATTATTGAGTATATTTAGAGTATTAGTCCCATGCCACTAATT	228	5	4	1	2
0045D	TAATCATTACTTACATTCATCATAAAACCCATATATTCTGTTTATACTAGCGCATTCGTGATTGCCACGTAAAAGGAAGAAATTTTCGGGGTATTTTATCTTATATGCCAACAACAGACATATCGTCTCCAGAGACTGTTTGCCACGGTCGACATAATCACCCAAGAATAAGTAGTTGGACTCAGGTGGAAAACTGCCATACTCAAATAAACGCAGTAAGTCATAGTATTGACCGTGAATATCCCCTGTT	250	5	2	3	2
00141	TAAAATGGGCGGGTGATGTCATTGAGCCAGACTAAATATAATTGCTTATCATATACGCAGGGGCGGATTGGCCTATCGGGAAATCGTGAAACTTCCCGATGGGCCGGTTCTTGTGAGGGCCGGCAGGGCCGGTATAATTATTATAATATATTTACAAAAACAAATTATATTTTTATAA	178	7	2	5	2
0016D	TAAATCTATATTAGACGCCATTTGGCGTCAAACGCGTTGCTGAATGATACTTATGACGCCAATTGGCGTCAGTACGCAGTCAACG	85	6		6	1
002F8	TAAATCCATATTAGACGCCATTTGGCGTCAAACGCGTTGCTGAATGATACTTATGACGCCAATTGGCGTCAGTACGCAGTCAACGT	86	5	2	3	2
00020	TAACACGTTCAATGCCACGGTCGACGGGTAGTCGACATCGGTAACATTTCGCGGGTCGCCGGTGTCGACTACCCGTCGACAAATA	85	15	9	6	2
0001D	TAATATTTGTCGACGGGTAGTCGACACCGGCGACCCGCGAAATGTTACCGATGTCGACTACCCGTCGACCGTGGCATTGAACGT	84	16	7	9	2
0018E	TAATATTTGTCGACGGGTAGTCGACACCGGCGACCCGCGAAATGTTACCGATGTCGACTACCCGTCGACCGCGGCATTGAACGT	84	6	4	2	2
0009E	TAAAGTGGAGAGATCGGTTGGGCGTGACCTCTCCGCCGCCGACGAAAACTGGTCGCCGCATGGGTCACTTCTAAACGTGAATAGACTATA	90	8	5	3	2
0023E	TAAGACGCTCTCGAAGGGGAAATCGTAAAACCGCGCAATATGCGGGATAGCGTTATAGGCGATATCCCGCCTATTGCGCTC	81	6	2	4	2
00201	TAAGAGCGCAATAGGCGGGATATCGCCTATAACGCTATCCCGCATATTGCGCGGTTTTACGATTTCCCCTTCGAGAGCGTC	81	6	6		1
0045B	TAAGAGGACGTGATACATGCATGCGTTGTCTCCGTCTTACAATTGCGTAACATAGCAAATTTTACGCTCAGCAGAACACGTGTAGCTCC	89	5	2	3	2
0010D	TAAGTACGCTGAAAACGATGGTGAAAACCGAATTTGGGGCACGAACTTAGTTTTGAAGTTATGGCCTAATGAAGTTCACTATTTCGCGATTTTTACGCATTCGCGCATCACACTAGTTTACTACGACTATTTCGAAAACACCACTATATACCAATTATTTTTAT	164	7	3	4	2
00214	TAAGATAAAAATAGTTGGTATATAGTGGTGTTTTCGAAATAGTCGTAGTAAACTAGTGTGATGCGCGAATGCGTAAAAATCGCGAAATAGTGAACTTCATTAGGCCATAACTTCAAAACTAAGTTCGTGCCCCAAATTCGGTTTTCACCATCGTTTTTAGCGTA	164	6	6		1
001E9	TAAATAATGTAATATCACATGAGCGGATAGTTATGAAATATATAGTACTTGAAAAACTGACAAAAAATGGATCCTATATAACAGGGATGGCGAACCTATGTCACGCGTGTCACGGAGTGGCCACGCGTGCATTATTTCAGTGACACGTCAA	151	6	2	4	2
00440	TAAGTACTTTTATATAAGGATGATTGGGATGCGATGTTCCAAATTGACGACATACTCGTTCTTCTTTACGGTGTGGATAGAATGATGGTTTACGAAGTATTGCTATCGGTTTTGAATTATACCATAAAGCAATTTCTTCACAGCCAAATAGCTGTTCCTTTTTATCAGTGGTTATGGGCAAAACAATAGGTATGGATT	198	5	4	1	2
00096	TAATAAATTAGTTTGTTATTTATTTATTATTTTATCTTATAACTACATTCGGGCGTTTGTCATCCCGCCTGCGGCGGAAAGACTGTGGGCAGCGGTGCATCTTTGTCGTTTCGCCTCGGGCGAAAAGACCGCATCGGCGATGCTGGGTTTTTTGATCCGGCCTGCGGCGGGAACGCGGTACCGTTGGGTATTGTGTTATGTCGTGTTGGCAGCACT	216	8	2	6	2
004AA	TAAATAAGTTTTATTACATTTCGAGCACTTTTCACTGTAGGCGGATTGTCCGTTCGGGAATCGACTTTCACCCGAGATGACTGATAGCTAGACACTCAAACTCAGAATCCGAATTTCCGATTTGACACACATACGAGAACCGGACATACACGCCCGGGGCGTCGTCTGCGATCCTGGGATTGCCTACCTGGCTGGTTGTGTCGTACGATCGACTTGAATCGCATGACTTACGACTAGACACTCTTCCAAG	250	5		5	1
004AC	TAATTACAAAGTATAAACTATACAATAAATTATAGTATAGTACCCAATATATTTTACCCACCAAATTACAAACACTGATTACTATAATTGTGTACATATACTCCGGCCCACGAGAGAGTATTACCGTCGCCTGACAAAAACTCGTCCGATTCCGCGCATTCCTCACTACTCGACATTGCCAATAGCTGTTCGGCAACGGTCGGCTGCGCACAACGCTATACGGTGTATAGCGATCGTGGGAATAGTGGGGGAAATGGGGCCTTGG	265	5	5		1
0038B	TAAACGTATAGAAAAATGATTTTGCGTAAACGCGTTTTGTCTATATTGCGCGTGGGTCAGAGAGAGAAAATAAATAGTGCGCTGACATCCTC	92	5	4	1	2
00271	TAATATTTTATAGCAATATTATACTTGTAACTATTATTTAGGTGAACTTTTATTTCCAAGTATAATATAAAATAATTTTATCAATATTCACATACATTTAGTAGAACCCTTGAGATTGTCCCACGGAACACAATTTGGGTATCGCTGGTCTAGACTGAGCCGAGGAGGTATGTCTACCTTTTCGTTAGCATGACTGCATCCATCCTGTGGTGAACCAGCTGTAAGCCATGACTCATCATCCACCTGT	247	6	6		1
00123	TAAAATGAGATCGTACCCCAGTGGCCAAGATGTACGCCGCTTTCTTCTGTGGCAGCGGCCCCCACCCCGTCACCATAGTGAGGACGGTGCCTGACCGTCGCCCTACAAAAACTGGTCGCTGCCGAGGTACGATCTCATTTTGAATAGAGTATAGTAGGTACAACATTTACATAGTA	176	7	2	5	2
003BF	TAAAAACGACTTTACGTTACCCTGTGACCAACTTGAGGTGGTGTTGCACAGCAAGTCGGGGGATATTTTCGATTTGCGGAGCGGAGCGACGGCGCCGAGGAGCGTAGCGACGAGTGCCGCTAGCATGGCATCACTGTACGAT	142	5	5		1
00094	TAAAAAACATCGTACAGTGATGCCATGCTAGCGGCACTCGTCGCTACGCTCCTCGGCGCCGTCGCTCCGCTCCGCAAATCGAAAATATCCCCCGACTTGCTGTGCAACACCACCTCAAGTTGGTCACAGGGTAACGTAAAGT	142	9	9		1
0038E	TAAAAAAAGTGTGAAAATATCTAAGGGAACATTTTGACCAGTTTCGAGATATGAATTTTGAAAGTGAGTACTGCGCGACCCTACACTTAGACATGTATACGGTCGACGGCAGAACCGGTAATTTTATATTTTAGAAAAAATATTTGAAAATGATCCGGAAGAGCTCGCGCTCTAAAACCTACATAAAAATAAAGGGGAGGAGA	203	5	2	3	2
003CB	TAAACCGTATATTTTGGAAAAGTTATTTGAAGTTTTGAACATGATCCGGGAGAGCTCGCGCTCTAAAAC	69	5	4	1	2
0001E	TAACGGTAGACCGTCTACCGGGGACACGGTCGCGCGGTACTCATTTTCAAAATTCATATCTCGAAACTGGTCAAAATGTTCCCTTAGATATTTTCACAC	99	16	10	6	2
000EB	TAACGGTAGACCGTCTACCGGGGACACGGTCGCGCGGTACTCACTTTCAAAATTCATATCTCGAAACTGGTCAAAATGTTCCCTTAGATATTTTCACAC	99	7	7		1
004A6	TAAACGTCTCCTCCCCTTTATTTTTATGTAGGTTTTAGAGCGCGAGCTCTTCCGGATCATGTTCAAAACTTCAAATAACTTTTCCAAAATATAC	94	5	2	3	2
003B5	TAACATTCGACATTACTGTTGATCCTAATGATTTCAGATCGTATATAAAATGTAATGGGATACTACACTTTGAGTATCCATATAGTATAGCACCTGTATTCGGTTTTGAAAAACGAGTATATAAGCCATACTATGAAATTCTTCGATCGGAAAAAGCTGTAAA	163	5	3	2	2
00405	TAATCTATACTCTGTCCAGCGAGAAAATGCGCCGATTCTGCGCATCCCTCGCGTCATCTTGCTATCAAAACTGGTTTCCCTTTGGCAGGATGTTGGGCAGGGGAACCAGTTTTGGTCGATGCGCGGTGCGTTCTCTCGCTGGACAGTCCATAGTAGAACTCTTCCTGA	168	5	5		1
00246	TAAATCAGGAAGAGTTCTACTATGGACTGTCCAGCGAGAGAACGCACCGCGCATCGACCAAAACTGGTTCCCCTGCCCAACATCCTGCCAAAGGGAAACCAGTTTTGATAGCAAGATGACGCGAGGGATGCGCAGAATCGGCGCATTTTCTCGCTGGACAGAGTATAGA	169	6	3	3	2
0034C	TAAGTGCGTTCCGACGGCGTACGCAGATGTTTGCGTATTATAATATATTATTACCTATCGAAAAATACTTTTCCACTTTTTTCTTCACACCATCTTCCCATCTTTACTTA	110	5	4	1	2
0015A	TAAATAAGTATTACAGTGCTGTGTGGGTAGAAAAGCACGGAGTAAACGAGCGGACTAAAGCGTCGGTTGCAACGCGCACCGCTGCTGGTTTGAATCTCGGTCACGGGCGGCACTTTCCTTTGCGCAGTCATAAAATTTTCAAGTGGGCACATACCTACGGGCGCATAAGTCTACACATGGATACTCA	187	7	4	3	2
00430	TAAATAAGTATTACAGTGCTGTGTGGGTAGAAAAGGACGGAGTAAACGAGCGGACTAAGGCGTCGGTTGCAACGCGCACCGCCGCTGGTTTGAATCTCGGTCACGGGCGGCACTTTCCTTTGCGCAGTCATAAAATGTTCAAGTGGGCACATACCTACGGGCGCATAAGTCTACACATGGATACTCA	187	5	4	1	2
001C1	TAATGGCTCAAAGCGCAGTAGAAAAGCGCAAACCTGATGAAATCGATTGGTTACGTACGGTTCGCTATGCATCTATTGGGTGTGCGGTTGGACCTACACTAACTATGTGGTACAAAACGTTGGACAGATTAGGAACTAAAAACACAATACCAATAGTAGCGAAAAAAATATTAGTCGACCAAATGATTGCATCGCCAATTA	201	6	2	4	2
00090	TAACCGTTTTCCATTTGCATTTTCAGCTCCTCCGATGAACCGGCGCACGTGGGAAGCTCCTCCGAGGGCAGACAGGCTCAGCGGCGGCATTCCCAGCGGAACTCTGAGCGACAGACACATTGTAGCGGAGGTTCGATACACATCACATGA	150	9	6	3	2
0007C	TAATCATGTGATGTGTATCGAACCTCCGCTACAATGTGTCTGTCGCTCAGAGTTCCGCTGGGAATGCCGCCGCTGAGCCTGTCTGCCCTCGGAGGAGCTTCCCACGTGCGCCGGTTCATCGGAGGAGCTGAAAATGCAAATGGAAAA	147	9	4	5	2
001CA	TAATAGTCTTGTACGTTTTTATTATCCGTCGCAGGCGAAATTCCAAACGGCTTCCTCGGACA	62	6	4	2	2
00402	TAAAAACTATTCTGTGCTAAGACAGTCATTCTATAATATTCACGGATATAGATAATATTTCATGACCAAATTATGACAGACGTGCAAAATTGCGACGGCCGTGTATCAGTGACACGGCTTTAGGTAGATTGTTTGCACATCGGGCACAGACTTCTATATAGTATAGAAGTCTGTGACATCGGGCTATACCATGGCATATCTATCTAAAGCCATGATCAGTGA	222	5	5		1
002A1	TAAGACAAAAGCGCATAGATGATACGATAGGAAAACGTGAGAAGTAGACTGCTGGATAGACGCCGGTAGGTGAAAACCGAGACGATGACGACATTGACCCGCCGATACTGTGCT	114	5	1	4	2
00154	TAACATTTACTTATATACTGTGGCCCACGAGAGAGTATCCTCGTTTTGCGCATGCAGACTGACGGCGGAGACCGTGCCGAGGCCCCGTTTCCCCCAATATTTCCACGTCCGCTATACACCGTATACCGTTACCGAACAGCTATCGGGAATGCGCGGAATCGGACGAGTTTTCGTCGGGCGACGGGATACTCTCTCGTGGGCCGCAGTATAGCAATAAACACATTGAATTTATTCTGACTACAACTTATTTTACATAATATG	261	7	7		1
000E4	TAATAGGCTGAAGCGAGAGAAAGAGAAAGATTACGGGAAGAAAATAGAAGACAGCGGAAATTAGAAACAGCATTCCGTTCGTTGC	85	7	3	4	2
001C3	TAAGATTGAACCGGCTTCGCGCATGCAGACTGAGCCGCCAAACAGTGCCTGACCCCCTATGCAATGGCTATGCGTTCTGTGATTGGCCGACAGTCATCGCCCGCTGTCGTCGATCGTCGGCGCCGGTGTTGGCCGCCGTGCATACGCTCCCACCAACGTCCGAAATGCGCGAAAAAAACGTGTTTTGGTCGAGCCGCCGGTTCAAT	206	6	2	4	2
0040C	TAACACCATGTTTTCTGGCCAGTTGTTCCACTTGATTGTCTCTCTCGCGAGCATACGGCTCGGTGTCTAACTCGAAAGTCAACAGTTTTACATTCCATTTGGCAAACAAGTCTGGAAAGACTTCGTGTGGCAACCCTCTGATAACGTACAGTCGCGTACCCAGTTTCCGGAGCGTAGTGTCCAAGTCCACGAGACTCTGTTGCAAGAACCTCCAGCGATTCGCACCCGCCCGTATGTATTTGCGGAAATAAGGGT	255	5		5	1
0038F	TAAAAATATAAAACCTATATATACTATATTCCAACTAAGATCAGGCTTCGGCGGCCGTGTGTGCGTATGGGCGTGGCTTTGTTCCGGTGGCAGTGCCTGATCTGCCGCAGTAGTGAGGACAGCGTCTGACCGCTGAGGAACAAAAACTGGTCGCCGCCAAAGCTTGATCTTATTTGGAATAAAGTATAGTCATACCGAGATTGATTCA	208	5	5		1
00392	TAAAAATTTAACAGTGTACAGCAACAGGGACGGATTGGGCCATAGGGAAATCGGGAAATTCCCGATGGGCCGCGTACTAAATAGTAAATAGTAGGTAGACGTAAATATAATCTATTAA	118	5		5	1
000EA	TAATTATATTATGTATAATTCAAGTGATAAACGGACGTTTCACCCCCGCCGTTTCGTCCTCGTCAAAAAAACCAGTCCACGGACGTTTTGTCCCCGGCAATTATTGAGATAGGACGTTTCGTCTCGGAGAGTTATTAGCAATAGGACGTTTGGTCCCCGGCATACTTTGATTATCCAAATGCA	183	7	4	3	2
0024A	TAAGGAACACAAACCCTCCGTTCATAGCGTCAGGATTAGCTGCTGCGGCAGCCGCTGCAGCTACAGCAACTGCTGATGCGACACTTGCAACTCCTGCTTGATGTGGATAGGTAGTCGGAGCAGGAAAATACTCTTTGTTGACGCAATTACGAAGACACTCGGGTATTCGACCTACAATTGCTCTACGGATTTCACTAGCAGCCATTTCTCTT	212	6	1	5	2
00359	TAAAAATAAATGCAAAGATATACAATGAACATTGAACATCAATAATAATATATGATTTAGGGGGACAGAGTGGTCGAGCGGACTAAGGCGTCGGTCGCGACGCGCACCGTCACTGGTTCGAAACTTGGCCACGGACGGCACTTCTCTTCAGGCCATCACGGTGTCTGGAGAGAGAGGCCGTCATCCCCCACCCGGACATGGCAGATACCTGCGGGTGCCAAACTAACAAACACACGTTTTT	241	5	4	1	2
0005D	TAATGTCTAGAACTACGATGCGAAGATTCAGCTCGGTCTTCCCTACGATCCCGGTCACGTTCAATATCTCTGTCTGCATCTACTGCTCTCCTACTAGAGGTCGGCTCTCGTTCACGTTCACGTTCCCGATCACGTTCTCTGTCTCTATCACGTTCACGTTCTCGATAACGATCATCATAATACCTAAAATA	191	10	5	5	2
000DD	TAATATTTTAGGTATTATGATGATCGTTATCGAGAACGTGAACGTGATAGAGACAGAGAACGTGATCGGGAACGTGAACGTGAACGAGAGCCGACCTCTAGTAGGAGAGCAGTAGATGCAGACAGAGATATTGAACGTGACCGGGATCGTAGGGAAGACCGAGCTGAATCTTCGCATCGTAGTTCTAGACA	191	7	2	5	2
002FB	TAACTTGTACAACCAACAATTTTTTCATAGACTTCAGCTTTCTGGTCCTCCGCAAGTCACTGTACAATTTATCCGCTATGGAACGGAGTTTTACGTCTAGAATCTTTTCAACGTCCGTCCTCAATTTTT	129	5	2	3	2
00138	TAACGACGTCGCACGTTCGTCGTTGTCTTGAGTCGTGGATGAGAAAGATAGGTGATAATTATAAACACTTTTAGAC	76	7	1	6	2
00167	TAACGACGTCGCACGTTCGTCGTTGTCTTGAGTCGTTGATGAGAAAGATAGGTGATAATTATAAACACTTTTTAGAC	77	6	5	1	2
00125	TAATACCTGCAGATTCCAAATATGTGAGCAGATAGCGTCGACTCCTCCCGGAAAATTGTCAGGAGCTCGCGGCACGACGGCGGCCCGCGCGTGCAACGCGAGGCACCCGTGACCACGGCCGGCCGGACTTAGGAA	135	7	3	4	2
0040E	TAAGGTCATCAAACTAGTGCTGAATCATGGGGTACTGGTCGTGCCGTTGCTCGTATTCCTCGTGTCCGAGGTGGTGGTACTCACCGCAGTGGTCAAGGAGCTTTCGGTAACATGTGTCGTGGTGGACGAATGTTTGCCCCCACACGTGTATGGCGCCGTTGGCATAGAAAAA	172	5	3	2	2
00192	TAAGTCTCGCCGTTTACGTGCAGGTAAAGGAAAAATGCGTAATCGTCGTCATGTTCAGCGTAGAGGTCCATTGATTGTTTACAGTAAAGATCAAGTAAGTTATCAAATTCTA	112	6	4	2	2
0047E	TAATCAAACATAGGTTGTAATTGTAGTCCTATACAACACTGCCGACCGGAATGTTTAGGCGAAAGAAATAGTGCTCCAGGTCGTAAAATGCCGTCAGTTACATTGCAAAACGAGTTCTTTCTCTCGTAGAACGGAGTATATAAATATAATTTACCCCAAATCGGAAGATCGTCAATATACATTTGATACCAGTAGTGATTTCGTACGGCATATATAAATG	220	5	1	4	2
00179	TAAAAGCATTTATATATGCCGTACGAAATCACTACTGGTATCAAATGTATATTGACGATCTTCCGATTTGGGGTAAATTATATTTATATACTCCGTTCTACGAGAGAAAGAACTCGTTTTGCAATGTAACTGACGGCATTTTACGACCTGGAGCACTATTTCTTTCGCCTAAACATTCCGGTCGGCAGTGTTGTATAGGACTACAATTACAACCTATGTTTGA	223	6	4	2	2
00409	TAAATATTTCTAAAAAACAGGCTAATTTATTTCTTGATATAAGACTAGACTATACTCTATTCAGAATAACTTTGCCCACTTTCGCGCACGCGACTGAGCCGCCGGCAGCCGTCAGACCCCCTCGCGAAAGTCAGGAGCGCTGTGATTGGTCGTTAGTTGTCGACGGCTTCCGTCACCGGTCGCTATCGTATACGTATATACCTGCGGGACGTCGGCAGGGGCGTTGCTGCAAACATCAGCGCCAACTGGTGG	252	5	4	1	2
00148	TAAGTTATAGACAATATTGTGTGTACTTATTGAAATGCAGGGGCGAAGATATTCCTTCGAGTTATCGAAAATTTGACTTATATACGTTCGAGTTATCGAGGTTTCACTGTA	111	7	1	6	2
00082	TAAACAACTGGTAAAATTTTCAAGTTTCTACGACTCATACTTTTTGAATAATAACAAATATCAAAAATCGTTTGAGGCTAAACCGTTA	88	9	3	6	2
00088	TAAATAACGGTTTAGCCTCAAACGATTTTTGATATTTGTTATTATTCAAAAAGTATGAGTCGTAGAAACTTGAAAATTTTACCAGTT	87	9	6	3	2
00455	TAATATAAATGAATAACAACTCAATATGATTATGTATAAGTATAATATATAATAACGTACAACTGGACAATCTAACGTGACTGTACACACACACCGTACACGCACTGTACGACGGTGGCTGTGCAAGTGATCCTTACATACTTCAAAAGCCCTATATAGGTATATGCACAACCGAGGTCATGTTACATCCGTATAGAGAGTGAGTCTCACGCTTGTATAACTAGATACTAAATTG	235	5		5	1
0007F	TAATGTACACTTAGGCCCGTTTCACATGGACGCGTATCATACGCGACGTATCGTACGCGCGCGTTTTCATTTACTTTGGTCAAATTCATATGGGCCACTCCGACGATGGCGCGTTTCCCTCGCCGGTTTGGCGCGTATGAA	141	9	5	4	2
00385	TAAATAGTTATAAATCATAGACCTTATACTAATAGACGGTACGTGGTTGTAGTTCCGGCGTCCAAGCGTGACGCCGCTGATCAAGGTAGTACAACGTACACCGCACATGCGCACTAGATGATACAATACTCTGTATATTACTGTATGCAATATATATATATATCATTGTAACACAAACCGCACCACCCACCCGCATCCCGCCTGGATGTTCTGTCTATTAGTATAAGGTCTATGTTATAAA	241	5	5		1
00427	TAATAATAATTATTATTATTTATTGCGTGTTGCTACCGGCGGCTGCGCGGTATACCCCCATACCGCGCGTTTCACCGAGCCCACCGTGATACAACTTCACTACGCCAGGTGGTGCAGGGGGTCTGGAAATTGTTATGTAATAACTGATATTACTAAGATATTACTGATATTACTAAGATAATCATTAGTTTATAGTAAATACTAAATAGTAAACAATAAATGAATAATATA	231	5		5	1
003CC	TAATACCATGTATAATATTATGTCTTATACCTAGGCTGATATACCGTCTCCGTTCAGAATCGTTTTTCTTATACAATGATATTATATCATTGAATTCAAATTGAATACCATCCATTATACAGTGACCCACTTGTAATCTACTGTACAGCAGAGCGACATCCACTTACCCACCTTTTTTATTTTTTATGTCTACCTCCGACTTTTTGAGCTATAAATATGCTTCGAATTTCAACTTTGAGACTTGTTT	247	5		5	1
00176	TAAATAGCTCGTAGAAGTATCTACTTAGAAACGCAGCATCCTGATGGTTTAGAAAAGATTCGTGAACTTGAAGCGCAAGGACGCCCAGCAAAACTTGAAATCAACGAGCCTCCGCCAACAGTACCAACA	129	6	1	5	2
00222	TAAAATCTTATAACGTAAATGACACAACAGACCAATTATAAAAATTTGTTGCTACGTATACACAAATGTCGACGACGCCTATAGGCGATTGTGGCCTGTTGGCTTCTGATCAGTATGATTCGGCATATGGAAGGGAAATCGATGCGAAGCGACAGACGCGTTTTTACGTATGACTCCCATGGGTAGTAAATGCATGAACACCGAAGGCAACTGATAATTTTTTATGATATAATATATCCTTCCGTT	246	6	4	2	2
0047B	TAACTCGTGTGTGTTTCTTTGGCAGAATTTTGATTGGGCCCCCTTTGCTTTCCGCCATGCCCGATCGGGGGATGGCGGCCTCTCTCCGGGCAGACATCTGTCTGGAGAGAGTGCCAAAATTCGAACCGTTGACAGTCTGCGTCGCAACCGACGCCTTTTTCCGCTCGGCCACTCCGTCCCT	181	5	4	1	2
00177	TAATGAAAATTGCCCAAGTTAGGGCTAATTATTATTGTGAATTTCTAAGAATAATAGTTATGTTACCTATGCATACGGCATTAGCAAAATACGGTTCGCATGTTCATTATTACAATCACACTGATTTTTCAGCTAAAA	138	6		6	1
002E4	TAATTCACTCTATACCTTGCGCCACGAGAGGATGTATATGGCATTACGGCAGCCGACCAAAACTTGTCTTTTTTCGTACATCTCCACCACTTTATAAGCAAGATTGCCACCCGCCAGTTTTGGCGGCAGGCGCGTACCATAGACCAGTTGCGTGCCGAATGCATTCTCATGTGGCGCGTAGTATAATATCAAAACCGATGAACAGAAATTGGTTATGTCAGACACAGTATGTAAGACGG	239	5		5	1
002DF	TAAAGTAAGCAAAATATAAACGTTTATCATAAGCACAATTTATTTCCAACGAATAAAAAACAAAATTTGGCTAACTGCTTACCGTTCCGCACAAAGCTGTTGTTCGTGATGTTGTAATGTGTTACGTGGGAATTCTTTGGCGCAAAACTGACACTCTGATGGCAGTTCACTGACTGCTTTCTCAACAGCCAAGTTACGCGTGGCTGTGTTTTTCGCAATGTCCACACGACAATTGGGACATGTGGCCATTTCA	253	5		5	1
001D5	TAACGAGAAGGCCGTCTTATCGGAAGATCTTGAATGATATCGCAGGTTGTTTGATCTATCCGCGTGTTGTATGTTTCCAAGCA	83	6	2	4	2
0017F	TAAACATAACTTTGTGGCACGGTCCGTACACTCAACTGCGGAAACGCTCCGAGTGTACGTATCGGCTGATGTTGATAGCTCCCGGATGGACAACCACCAGGAATTTTTAGCAATAAATCCTTGCCACACACACAAAACGTGTTCCGACCACAGTTGTTCCCCCTACCCCATCCCTACAAACAAAAAAGCTATTGGTCAGTTGCTGGG	207	6	3	3	2
00416	TAACCGGTGTTGTAAAGCTTTTGGTTCCGGTTCCAGCAGGGGTACGAAACTCCGTGAACTGGCCGAGAGCGATTGTGGCCTTGAACACGGTTCCAGGGGGGCGTGGCATACGTGAAATAGGGAATGGTAAACAAGCCGACCCTGCGTAACGTATCCGAGTGCGGTGCGTTGCGATGACGTACATGGTACATCCGAAAAAGTGAGCTGTGAGCGTTGGTCGGTCGGCAGCGGTCGCGTCATGGAGGCAGTAGGTACGCGCATTA	263	5		5	1
001E0	TAAATATCAAATGTCTGGAGATAAAGAGGACTCGGTTCAGAGAGCCAAGCTGGCCGAGCAGGCGGAACGGTACGACGACATGGCTAGCTCAATGAAATCTGTTACCGAAACTGGCGTGGAACTATCTAATGAAGAGCGCAATCTGCTTTCGGTAGCCTACAAAAATGTTGTAGGAGCTCGGCGGTCATCGTGGCGAGTAATCTCTTCAATCGAGCAAAAAACAGAAGGTTCTGAGAAGAAAC	242	6	6		1
003E0	TAAATTTTCAAGCTTTTTTATCCAACAAATAAAATTTTATTGATATTTTTAGAAAAAAAACTAAAAAAAATGGAAAATAAAAATGTCCGTAAAGAGCTCAAAATACATCAAAATATTTTGAAAATGTTATGGTGTATAGAAGATGCTAAGATAAACATTCAGTCAAAATTTCATGTATCTACGGTAA	187	5	2	3	2
00099	TAAACCAACGGAGTTACACGTGTTCTGCTGAGCGTAGAATTTGATATGTTACGCACTTGTAAGACGGAGACAACACATGCGGGTATAACGTCCTC	95	8	6	2	2
0020E	TAAAAACCCATAATGGAAAAGGAAAGAATACTGCCGTATTTTGAACATAAAATACAGGGAATATATCTTTATACTTGGTCCCAGAAGAGATCATTCCGCGGCACAACTAAAATCGGGTTTTCTGTGCGTCCCCCTGCAATAGGGGAACCGGTTGCGATAGCTGGGTGACGTGGGGTGATTCACAGAACCGGCATGTTCTCTCGTGGGACAGGGTATAGTCTATA	224	6	2	4	2
003DA	TAACGCAGCATCACGGGTTACTTTAGCGCAAATACTAGCAGCACTTACAATTGGAAACAAAGAATCAGCTTTTTTAGACACTGTGATTTTTAGTTGAGGGAATATTGATAGTAATTTTTCCTAAAAA	127	5	1	4	2
000CF	TAAGTTCATACGCGCCAAACCGGCGAGGGAAACGCGCCATCGTCGGAGTGGCGCGTATGAATTTGACCAATGTAAA	76	8	6	2	2
00390	TAAAATAACAGATTTTTTTTCACCAACTGGAAAAAAATCGAGTCAATTCATACTTGTCAGATGAAGTTTGGATTTTC	77	5	5		1
001D0	TAATTTTACGTTACAAATCGTCAGTCAGTAATGTTTGTTACGTGGTGAAAATACACCCGAAAATATACTCGTAGAAAATTATTGTCGATTAGACGTACTTCAATATTTTCATATTATTTCTTTTATTATAAATTCATATTTTTATCATTGACCGATCGTTCACAAGGTTCTTACGTTTATGATAAGAAAATCATGGAGAGGTAATTA	207	6	1	5	2
000D2	TAACTACGGAATTCGGAACGTGTCTAAACGGATAGCAATCAAAACGGCGACTAAACGAGTAAGAAACGTATGCTGTATACAGTACGGTCGTACAAGACACATTATCTGTTACAGATAAGA	120	8	7	1	2
0018A	TAAGGAGGTCCCATTGCCCGTGGGATCAGGCGACGTGCAGCAACGCTGCGTTGAACGGGCACTTGGACTGCCTGGTCTATGCGCGGAGACACCGTTGCCGCTGGAACCAGGCGACGTGTAGCAACGCTGCGTTGAATGGTCATCTCGATTGCCTGGCGTACGCACGGGAGCAAGGTTGCCCGTGGAACGTGGACACGTGGAGCAGTGCCGCATCCAACGGTCACCAGGCCTG	232	6	2	4	2
00247	TAAAGTTTATATACTCAGTTCAGCGAGAGACCACGCCGCGCACAGCCGAAAACTGGTTTCCCCCACGCAACACCCTGCCTTTGGAGAACCAGTTTTGATAGCCTGGTGACGCGGAGGGGTGCGCAGAATTAGCGTGCTCTCTCGCTGAACAGAGTATAGGTACCAAGAACTAAATATATTTTTAGAAACTATTTA	195	6	3	3	2
00229	TAATAAATAGTTTCTAAAAATATATTTAGTTCTTGGTACCTATACTCTGTTCAGCGAGAGAGCACGCTAATTCTGCGCACCCCTCCGCGTCACCAGGCTATCAAAACTGGTTCTCCAAAGGCAGGGTGTTGCGTGGGGGAAACCAGTTTTCGGCTGTGCGCGGCGTGGTCTCTCGCTGAACTGAGTATATAAA	193	6	5	1	2
004A1	TAATAAATAGTTTCTAAAAATATATTTAGTTCTTGGTACCTATACTCTGTTCAGCGAGAGAGCACGCTAATTCTGCGCACCCCTCCGCGTCACCAGGCTATCAAAACCGGTTCTCCAAAGGCAGGGTGTTGCGTGGGGGAAACCAGTTTTCGGCTGTGCGCGGCGTGGTCTCTCGCTGAACTGAGTATATAAA	193	5	2	3	2
00431	TAAAAAAAATTTCCCGCAAACTTATCGTTCAAAAGTTATGGCAATTCAAAGTTGTCGATATTATCAAATATTGCAGTGATTACGCGTGTATCGGCACTCGTCGCTACGCTCCTCGGCGCCGTCGCTCCGCTCCGCAAATCGAAAATATCCCCCGATTTTTTGTGTAAAACCACCTCAGGTGAACCTCGGTTTTCCTCAAAATTATTTCTAAGTACAATTATTGGCGGCGTGGTCACTCGCTCGTCGGTAATCCATTCAAAAGCTGAAAAAAAAAGGGTGT	280	5	2	3	2
003A5	TAAATTTGTATGGTACAGTAATCCCTCGTTATCCGCGAAAGTTACGTTCCAGCAAACCTGCGTGGATAACAAAACCGCGGATAACGAGATCAGTAGTTATCATAGACCCATAAGTATATATATGTATGTATAATGTATATGTGTTATACCTATAACAATATAACAACAATTATCTACAATTGTAAAAAATAAATTTCTACTGTTCGGGTAATAACGGTAAAACGTTATCTCAATCGCA	238	5	3	2	2
00457	TAAGAGGACGTTATACCCGCATGTGTTGTCTCCGTCTTACAAGTGCATAATATAGCAAATTATACACTCGGCAAAACACGTGTAGCTTCGTT	92	5	5		1
00198	TAAACCAACGGAGCTACACGTGTTTTGCCGAGTGTATAATTTGCTATATTATGCACTTGTAAGACGGAGACAACACATGCGGGTATAACGTCCGC	95	6	2	4	2
002FE	TAAATTATTCACACAAAGACGACAAGCATAAAGACGATGGGTTCGTTCCATATGTGTAGCTAATTGTTCAAATGACGTAAACTCTGGACGTTCATAACATTTTTTACAGTAGCAACGCAGTAATTGGTCAAAGGAATTTTCCACAGAAAGATCACCAAATGCAATGCCGTACTTTTTGTTATAACGGGGATATGAACGTTCTTCCAAA	208	5	2	3	2
0015F	TAATTACAACAAAATAAGAAAATCGTTACGTAAGAAATCGAGTGAATATCAAATGTTGTAAAAATATGAATTTCAAACGCCCATAAAAA	89	7	5	2	2
000B1	TAAATTTTTATGGGCGTTTGAAATTCATATTTTTACAACATTTGATATTCACTCGATTTCTTACGTAACGATTTTCTTATTTTGTTGTAA	90	8	4	4	2
003E4	TAAAATATATCGAAGTTGTTTTTACCCAAGTATCTCAAATATTTTACTAACTGTTGACGTAAAAGCAATTTGGCGGTACCAA	82	5	1	4	2
002D5	TAATACTTCTTATGTTTTAGTCGTTATACATTTTTATAAGTTTTAGTCATTTTTTACACAAATATTACCAACCCTGAACTATACTGCACCCAGCGAGAGAACGTAACTGAGCGGTGATCAAAACTCATAAATTACTGCGCATTTCCGCGTGGTTGGAGAAATTCATCTAGACATGGGCGAACGAGTTGCGTTCTCTCGCTGGTCTCAGTATA	212	5	1	4	2
001D8	TAAAGGAGATTTTTTGAGGGACACAAAGCTTACGCCACAGAGGCCAACAGTGTTATGAAACACAGGAGAAACATAATACATTACAAAACGACTACAGATGTCTTGAGACGGTGACTGATCAGGTGAGTATAGACTTCGCTCGTCCCTCCACCCATTATGGCGAAAGTATACACGGTTGTGGAATAAAGATGTCGGAAATGTATGTTGTGA	210	6	2	4	2
00401	TAATACTATACTCCGGCCTTCGAGAGTCCAACCGTAAACCGACCGGGAAAACACGTTCGTCGCTGCGCATCAGTCCCGCCTTGCTAACTCAACCTAACCTAGCAGAGTAGTGGGAATGGTACCATGGGGGGAGAAAATTTGGCTAGCAAACCTCACAAGCATCAGTATTGATGTGCGGTTCGGAATCTCGTGGGCTGGAGTATAGATTATATTTTGCAACACT	223	5	1	4	2
001DF	TAACAGTGTTGCAAAATATAATCTATACTCCAGCCCACGAGATTCCGAACCGCACATCAATACTGATGCTTGTGAGGTTTGCTAGCCAAATTTTCTCCCCCCATGGTACCATTCCCACTACTCTGCTAGGTTAGGTTGAGTTAGCAAGGCGGGACTGATGCGCAGCGACGAACGTGTTTTCCCGGTCGGTTTACGGTTGGACTCTCGAAGGCCGGAGTATAGTA	224	6	5	1	2
003F9	TAAAATGTCACCTGGAAAAAGAATGCACAGCCATATGATCAAGTAGACTAAATATCTATGGCGGGCCATATTTCTGACGGTCACGCTCTGGACGTTTGACATGACAGTTTATTCAAGTTTGCAGTTGTTTCCAGCCTTTGAACATCGGCTTACAACTTATACATACGTTCACATAGTTTCTATTGTCGCTTCACTTTCGACGAAAGTAAGTTAGGTACGTGGACAGTTTCCAATCATTCGCATT	244	5	4	1	2
00313	TAAGATGCGAGCCGCAAAAGTCTATGACGCGAGCCGCGGTTTGGCCACCCCTGCTATATAGCAAGGAGAAAATAAACCTAAGGAGCGAGGTTATAAAGTTTTTACTCACCTGAGCGGGGTTATAACAAACCAGTACCAGATAATCTATAATCCATATTATTGAATTCAACA	171	5	3	2	2
00060	TAAAATAACATCGCTATATCCAGATTATCGTTATAACCGATATCGTTATATACGAATAAAAGTACTACACATTACATATAAAACCAACCAAATACATTGCTTGGAATCGTTTTACCCGGAATATCGTTATATACGGCATCGTTATAAGCGAATTTGACTGTATGTGAATATTATGATACATCAATGCGCGATTCAAAATGTTTTTTTCCATCTGTGACCCCATGAGCTATACATTT	236	10	3	7	2
003FB	TAATGTATTGGATAATGCAATCTCACGTAATGGTCGGAACGGGAACATTTAGGGCACTGTCACGCGAGTTAGAGTGCGAGGTGGCGCGTAACAGCGTGACAGCTTCTCGTTCAGAGCTGCA	121	5	2	3	2
0029C	TAAATGCAGCTCTGAACGAGAAGCTGTCACGCTGTTACGCGCCACCTCGCACTCTAACTCGCGTGACAGTGCCCTAAATGTTCCCGTTCCGACCATTACGTGAGATTGCATTATCCAATACA	122	5	3	2	2
001DE	TAAAAAGATTATAATATTTATACTCTATTCAGAATGAGATCGTACTTCGGCGGCGACCAGTTTTCGTCGGGCGGTGGTCAGACATATGGTGAGACGCTTCCCCCACCTAGAAAGCTCGTGGGGCTAGCGCTGCGGAACGAAGCCACGCCCATGTTCAGAAGTTGACCGCCAAGGTACGATCTCGTTCCGAATAGAGTAATATTGCA	206	6	3	3	2
001F6	TAATATATTATAGTAATTGGTAGTATTATTGAATAATGTATGAGATGTGAGGAAAGTATGTGATTACCTATAGTCCGCGCAACGAAAACTGGCCAGTGACCCCCGTGACCCACCCATAACCGTCCGCCCGCCCGGAAATGGCCACTAGAGTCGCGCTGGTCACTGGCCAGTTTTTGTTGCGCAGGCTATAACATTGTTTGTTGATA	206	6		6	1
0021A	TAACAATAATAATCATAAGTATCATATTACGATCGGTGGGGATTGTCCATCGGTCATTAGCAAGTAGACAATTTTATATGTACGTCAGTTCGATTTATACTTTTCATAATAAAAGACTATAATATACGTTTATGTTATTATTCATA	146	6	4	2	2
0039E	TAATAAATAAATAATAATTATAATTTGTGCAGGGCGTGGCTTGATCGGTACTGGGTGCGGAGCGCGCGGGGGAGAGGTTCCCGACTGCGCTTATCCTAGAGGGTAATATTATTATAATATTAGATAAGACTTCTGCTGGACCTGGTGGTGGGGCCAAAGTTAGTGCCGGCCGAACGAAACTACTTATTATTTATTATACTTGCTGCTACAGAACCCTATGTGTTCGGTCGAAAACATAGCTCATGACTTCAATCATTACG	260	5	2	3	2
00324	TAAAGAGCCAAGAGGTCAGGCTTTAGCATGTAATTCTGCGCCACAGTCACGGGGTGGCACCACCCCCTTTGAAAAGTTGACGCAACTGCGTCAAAATTGACCACTTCGGCTCGCCACTGATTGTATTATACAGTATTGT	139	5	1	4	2
002F7	TAATAGTATTTGTGTGGCAAGAGCGGGAATTGGGCTATTTGAGTCTCGGGCAACGTGTGCAGCACGAGCCAAATTTCGCCCAAGACTGAAATTGCCTTCTTGTACGAGCCATACATACTATTTTTTGTCACGCCTCTGTGTTGAAAAATTATGCATCA	158	5	4	1	2
0030A	TAAGGTAGTCTCGTAAAACTGGAAAGTACCATTTTGGTAGTCTCAGATAAAAGGATTGTGATGTTTCACAAAGTAAGCGCGGTAGTCGCGATAACGGAGTTAGTCTTGGGTGGTAGTCGCGATAACAGCCGTAGTCTCGTTGAACAGGAAAGTACCAAATCTTTATACAAA	171	5	3	2	2
003DE	TAACCAACTCTAAATGCACAGCACGAGTGACGAAACATACGAAGACAGCTATATAACACTTGACGCTTACAACTCGCCTGATGCCACTGCGAATGAGAATAGGGCCACAGAAGTCTACGCCTGTTCGAGCAAATGGCCGTTCAATGTTTACTCGCTCCCGCGGAAGGGGTGCCATAAATGGAGTGATGAATTTAGGACTTGAACGGAAACAGGTAATACAATTCCTTACTGTTTTCTTCGCGATT	245	5	4	1	2
00414	TAAAAAAGGCGGGTAAGTCGTGGATGTCGCTCTGCTGTACAGTAGGTTACAAGTGGGTTACTGTAATGGATGGAA	75	5	1	4	2
0004C	TAATCATATCATAATATCTATTAGGTACTTATAAGTTATAACGCGTTATACATCAACAAAAAACCGTGGTAAAATCATAGATATATAATAGTATACTTTAGAAGTTTCAAGTACCCACGAATAATATTATACAATCACAACAAAATAACTAAAATAGTTATCCTA	165	11	5	6	2
00022	TAAAAACCTAGGATAACTATTTTAGTTATTTTGTTGTGATTGTATAATATTATTCGTGGGTACTTGAAACTTCTAAAGTATACTATTATATATCTATGATTTTACCACGGTTTTTTGTTGATGTATAACGCGTTATAACTTATAAGTACCTAATAGATATTATGATATGA	170	15	9	6	2
001B2	TAAAATTCAACTGCATCTAATCCTCATTTTATTATTTGGGAAAAAATTATTTTGACGTGACAACGTCTTATAATTC	76	6	5	1	2
00480	TAATAATAATGAATCGGCTGACGACGACCGTGTGTGTTGGCAGCACACCGTACGAATTGCCACCCCACTCCGCCCGACGGTCGCCTCTACGCGCGTGACAACTGATGTTGGGTAGCCTACGCGAATGGAACGCCTCACAGCGAGGTAACGACGCACGAGTCATGTTTTTTCGTGCGTGCAGCCGGCTCCATCGAATTATAAGACGTTGTCACGTCAAAATAATTTTTTCCCAAATAATAAAATGAGGATTAGA	253	5		5	1
00120	TAAAAGTTCGTAACCTAGATACAAATGTAGAGAATTCTGGATGGGCTGGCGTTGAATTGAATCGTATTTGGTCGACCAATGACTGGATATCGTTTGAACATCTTTGGAAATTCA	114	7	1	6	2
004A9	TAAAATTGAAACGAAAAGAGATCCAATTACCTCTAGAGTATTACACGCTACAAAAACAGGTTCATGGAGTAATGACTTTTCAATAAATTCCGAA	94	5	5		1
002B1	TAACTTATCCTGAAGAACTTCATGATCTACATTCAGATTTCCCTTTAGCACCGGAAAGACATTTTGATGACAAACAACTCCCAAAATTA	89	5	3	2	2
0005B	TAAATTTCACCTTGAACGAGAGCGTACACGCCGACGTGAACGAGACCTGGATCTTGAACGAGAACGAGAACTTGAAGGACTACGACTGCGTCTGCCTCCACCACGACCGCGACTACTACTTCTGTCTTCTAAGAGTCTTATGCGACGTCCATTCAATTCTGTATCATCCAACTTGTCCAATGCA	184	10	3	7	2
0028D	TAAGAATACGTAATACTGGTCTTACCAGTGCGTAACATACCAAATTTACGCTCAGCAGAACACTCGTAGCTTCGTTA	77	5	4	1	2
00333	TAAAATTAGGGGCAAGAAGTGGCCGAGCGGACTAAGGTTGCGATGTGCATCGTCGCCGGTTCAATCCCCAGCTACGGGGTGTCACGGATTCTGGAGAGAGGCAGCCGCCATCCTACACCCGGGCATGGCGGATCCCTACGGGTGCCCACTTGAAAATTCTACCAAACTAAAACCTACAGTACCTACAAGTATTCTCCACCACA	203	5	3	2	2
000CB	TAAGGCGTCGGTTTGAATCCGGTCGCGGGCGGCATTTTTCTTCGGGCAAGTCACAGTGTCCGGAGCGTATCGCCATCTGCCGCCCGGGCATGGCAGATACCTACAAACACAAAACAGCTAATGGTCATAGTTGCCATACTTCATGATCAATAAAAAAATAAATAAAAAAAATGTAATTATTGTTGAGGATGCTTTTATAAAAAAA	205	8	2	6	2
0031D	TAATTAGCTTTGTTTTTATGAGCCGCTGTATTCACGTTCCCAAGTGATGGAAATAGCACTATGGGAGAAAATTTGGCCGGCAGACGTCGGGTATGCAAGTATCGATTGCGCGGTTTACTTATGGACTCTCGTGGTTCGGAGTATAGCATAGTTTACTTTATTATGGAACAATGTCAACATTAGAATTATAGGTGTTTCTA	200	5	3	2	2
003D7	TAAAAATATTACTATCATTTCATATTTGTCTATACTCTATTCAGAATAACCTTGCCCACTTTAGAGCACGCGACTGAGCTGCCGGCAGCTGTCAGACCCCCTGGCGAAAGTCAGGAGCGCTGTGATTGGTCGTTAGTTGTCGACGGCTGCCGTCACCGATTGCTATCGTATACGTATACGCCTGCGGGATGTCGGCGGGGGCATTGCTGCAAACATCAGCGCCAACTGGTGG	232	5	1	4	2
0049B	TAATAAGAAATGTGAAAACCCGCAATAATGACCGTGCCGTACCATTAGTGCGAAACGTCC	60	5	5		1
00292	TAAACGGCACGTTATGGCGAGCGTCGCGCGGCGTTCGAACAACCGGTCCGCCGACCGCCATAACGTTATAATTCAGTGCAAAAATTAGTATATTTTATAATCTAAGGTGGAGAAAAATATCAATTTTTCTAAATACGTCCAAAATTGATAAGCCTA	156	5	2	3	2
000ED	TAAAGTTCAAATTTTGACTAAATACGTAAAAATTACGGCAATGTTCAAATTATCTTAGACNGAAATTCNAAAAGTTTTC	79	7	5	2	2
0016C	TAAATCATAAACTTACGTACAAACAGCACGGGGTCCGCAATCTACCGCAGGTAGATTGCCTACCTGATAATATACTGCTTTGAATCAGAATTTTTACTCCGGGCAACGAAAAA	113	6	2	4	2
000E7	TAATCCTAAATTGTATATACTCTGTTCAGCGAGAGAGCACGCTAATTCTGCGCATCCCTCCGTGTCACCAGGCTATCAAAACCGGTTTCCCAATGGCAGGGTGTTGTGTGGGGAACCAGTTTTCGTTGGTGCGCAACGTGGTCTCTCGCTGAACAGAGTATAGTGTTGGTGCTAGGGACACAA	183	7	3	4	2
00351	TAACGCGTTGTCGACTGCTCTGACAGCGGTCACGCGCAACATTTGCGATTCACTCTGATCACTGACCTGTCCATAAAAACAATTTTTTCTTAGAATGTTTGCTAATAATTTTGCTCGACTGGTTAGTACCTAAGTCACAATTGGACGCTGATCGCACATCAAACGCGGTGATGCCGTAAGAATCTAATCTTTTTCGACTTCAAAATATTATATTCTACTTGCCGTTATAGCAGTCGTCGTCA	242	5	5		1
00048	TAAATCATACACTAACGTACATACAGCACGGGGTCCGCGATCTACCGCAGGTAGATTGCCTACCTGATAATGTACTGCTGCGAATCAGCATTTTTATTCCGGGCAACGGAAAAA	114	12	3	9	2
00143	TAAACTAACATTATTACATATACTCTATTCAAAATAATACCGTGACTAAGCGCGACCAGTTTTCGTCGGGCGGCGGTCAGACATATGGCCAGATGCCGTCCCCACTACGGCAACGCACCAGGCGCTGCCACGGAACCAATCCATGCCCATGCGCACAACTCGGCCGCCTGGTCACGGTCTTATTTTGAATAGTGTATAGTTGTTTTCAAAAATCTAAAATAA	222	7	4	3	2
00439	TAAGTTTCATAATTCTCTCCAATATTGTATGGCTTCACCTGGGTCGGTAGAATTGTCTCCAAGAAAGTCAACGTCTGAAAATTTGTCAATGCATTGGCTCCACTTCCCAGTTCCGTGTACGTGGTACATCATATATTTCAGTTTTGAAAAACATTATAAGTATAATCCCCTGTGTGAACTAAAAACGATAATCTA	195	5	3	2	2
00306	TAATCGTTATCTGCGAGATTGACGATTACGAGTTTACAGCACCGTATCAAACAGA	55	5	2	3	2
00371	TAAAATATAATATCAAGTGAAATAAAAACAGAGATACCACTAAAAACTGTTTGCGTCCAATATTTAGCCAGTTATGGGCATTTGAAAAATACGCATGACGTAATAATTTCGCCGCCGCCGATTACTGTGTACACGATTTTACGGGAGTAATACGACTCTCGCTGTTTATACGCTTATAACTCGGCTAATACTCAATTTATTGGTGTAGAT	210	5	4	1	2
000A9	TAAAGATCTACACCAATAAATTGAGTATTAGCCGAGTTATAAGCGTATAAACAGCGAGAGTCGTATTACTCCCGTAAAATCGTGTACACAGTAATCGGCGGCGGCGAAATTATTACGTCATGCGTATTTTTCAAATGCCCATAACTGGCTAAATATTGGACGCAAACAGTTTTTAGTGGTATCTCTGTTTTTATTTCACTTGATATTATA	210	8	5	3	2
00376	TAAATTATTAGAGATATTTCAAGCTCCATAGCATCAAAAACTTCACCACAATGTCTTATGGAATCGTCTTCAATTTGTCTATCTAAAACAGCTAGATGAGCA	102	5	3	2	2
0004E	TAAAGTTCAAATTTTGACAACATATTATGTAAAAATCACGAAAATTCGTAAATTATTTTATGCTAGAAATTCATAAAAAATTTTCCTTTTATATCTAAGATTTCAAAA	108	11	5	6	2
0033C	TAAATTTTGAAATCTTAGATATAAAAGGAAAATTTTTATGAATTTCTAGCATAAAATAATTTACGAATTTTCGTGATTTTTACATAATATGTTGTCAAAATTTGAAC	107	5	4	1	2
00493	TAAATTTTGAAATCTTAGATATAAAAGGAAAATTTTTTATGAATTTCTAGCATAAAATAATTTACGAATTTTCGTGATTTTTACATAATATGTTGTCAAAATTTGAAC	108	5	4	1	2
0031C	TAAAGGCGGGATCCCACGAATCGTGTATTTGACGAATATTCGATATTTGTTATTCGCCACCCTCCCGTCGATTGTCGGTAACTTGCCGATTATTCGTGTATTCGTGGATATTCGTCAAATACACGAGTCGTGAGAT	136	5	5		1
0004F	TAATATTCCATTATTACAATGTATCGTTACGTAAAATTTTACCGCTAACTACGAGATAGCGGTCACTTTACTAGCGGCAAGCTTTATTGCCC	92	11	7	4	2
00029	TAACGGGCAATAAAGCTTGCCGCTAGTAAAGTGACCGCTATCTCGTAGTTAGCGGTAAAATTTTACGTAACGATACATTGTAATAATGGAATA	93	15	8	7	2
00382	TAATTGATGAAAGTCATAGTTATTATAAGGTTTTTGATACGTGCATAACCGGCACGTGTACTGTTTCTCAA	71	5	2	3	2
001E4	TAATGCATAGTACCTACTAAATAATTTGTTTTTGTTTTTATGAATATAACTGAGTAGTTGTGTTTACGTGTTTTATTTTATTTTGAGAAAACCATTTGTTTTATGATAAGACCAAGACATAGGTACAGAATTGAAGATTAGCAATAGAAAATGACTGTATTTTA	164	6	2	4	2
00370	TAATGGGCAACGAATTGCACAGGATCAGATATAGTACGGGTGTGTCCATCTACCCATGGCAATCAATTATATAATATTTTGAAACTTATGGACCTTTTT	99	5	3	2	2
00119	TAAATCAAGGTATGTACATTGTAATGACTTGTGCGTTTCACAACAAATGTCCCTCGATACTCACACGCCAGGTGGCGTTTTTTCGTTAGGGTTTCCACAAACTAGCATCTAACTACGGCGATAAA	125	7	1	6	2
001A7	TAATATGTAACACGATTGTCAATGCCTCACCAAAATTATCAATCGGATTATGATCTTGATCAACTAATTGAACGGTTATCGAATCAATATTTGTTTTATTCAATTTGTAATATA	114	6	3	3	2
00051	TAACTACAGCTCGTCCCGTCTACAATTTGGACTATATTTCAGCACCTGTGGCGGTGGAATCCCGTCCCGTTTCTCCAATAC	81	11	7	4	2
000B8	TAATAATATGGAGTCAGTCTAATTTGCTAATTTGTTCACAAATATAGATTTCCAAAAAATCAATGAAATAGAAGGGAATAACGGCTAAAAATGTTCGAATGAAATGATCGTCTCAATAATTTCTACCTGGCATAGAATCTGCGGTAGGTAATCATTTCACAATTAGTGATGGTAAACAATGCTCAGTAAATTAGTAAACACGGTCAGAGGCTGTCTCAAAACATAATCCAAACCACTTGTCTGGGATAGAGAAG	254	8	8		1
0009C	TAAAATCATGGCCTCCAAATCCTTTATTCGTCTGTTCATTTACTTCTGACTCATCGTTGGAGAAACAAAATTTTCTGAAAATGTCAAGTTGTAACAAATATATAAATACCAAATTTATGAATTATGTCAAATGATTTTACCTCTTAGATGCGATTTACTAGTCGTGCGCAGAGTAGTACCAATATTGCCGTGAATCACTAACATTTATTTTGCTTCTCTATCCCAGACAAGTGGTTTGGATTATGTTTTGAGACAG	256	8	8		1
001B0	TAAAATCATGGCCTCCAAATCCTTTATTCGTCTGTTCATTTACTTCTGACTCATCGTTGGAGAAACAAAATTTTCTGAAAATGTCAAGTTGTAACAAATATATAAATACCAAATTTATGAATTATGTCAAATGATTTTACCTCTTAGATGCGATTTACTAGTCGTGCGCAGAGTAGTACCAATATTGCCGTGAATCACTAACATTTATTTTGCTTCTCTATCCCAGACAAGTGGTTTGGATTATGTTTTGAG	252	6		6	1
0042B	TAATACCATAGATAAGTATATATTATATGTCTAATACATAGACTGATATACCGTCTCCGCTCAGAATCGTTTTTCTTATACAGTGATATTATATCATTGAATTCAAA	107	5	4	1	2
0049D	TAACGTTACTGAAAAGTGTAACTACGTTACAATAACGAGTAACACGCGTTACGTTACTACCCAATACTGGGTATATATTA	80	5	4	1	2
0002A	TAATTTTACTGTAACTCAAAAAATAATTATTGTAAGCACTTGAAATTTGCAACAGATGTTTATATTAGCGTTGTCTATACA	81	14	7	7	2
00492	TAAATATCTGTAAAAAAACTCAACCGGACTAAGACAAAAAATTTTTAGGAGTGTTTGAAA	60	5	3	2	2
003C8	TAAATTTCAAACACTCCTAAAAATTTTTTGTCTTAGTCCGGTTGAGTTTTTTTTACAGATA	61	5	3	2	2
00006	TAAATAACGGTTTAGCCTCAAACGATTTTTGATATTTGTTATTATTCAAAAAGTATGAGTCGTAGACACTTGAAAATTTTACCAGTT	87	33	19	14	2
00007	TAAACAACTGGTAAAATTTTCAAGTGTCTACGACTCATACTTTTTGAATAATAACAAATATCAAAAATCGTTTGAGGCTAAACCGTTA	88	31	22	9	2
0049C	TAATCTATTTATAGGCAATTGAAATAATCGATTTTTTTTGATTTTTTTTTATAAATGTTGATAAAAAAAAATTAGCTGGGACAAAATACTTGAAAA	96	5	3	2	2
003A6	TAAAATTCGGCTGCCGTACCACTACGCGTTGACATTGGTGTGCCTCGAGAAGAATTTTCTGACCGACGGCCGACGCTCGGACGA	84	5	1	4	2
00087	TAAGTACCGGGCTGGGTGTTGTACTCGGCAGAGCAGTTACCACGCTGCGATCT	53	9	7	2	2
00140	TAACAGATCGCAGCGTGGTAACTGCTCTGCCGAGTACAACACCCAGCCCGGTAC	54	7	3	4	2
00204	TAAAAAAAAATTACCACCACCGTGCGTAGTGGTACGGCATGAGGAGTTGAAAAAAA	56	6	5	1	2
00152	TAACGACCCGGCGGGCAGCTTCCGGGAAACCGAAGCTTTTCGGTTCCGGGGGAAGTATGATTGCAAAGTTGAAAC	75	7	6	1	2
00056	TAAAAACCTCGTCCGAGCGTCGGCCGTCGGTCAGAAAATTCTTCTCGAGGCACACCAATGTCAACGCGTAGTGGTACGGTAGCCGAA	87	10	6	4	2
00026	TAAAAGAGTCATAGTTACTCCTGCCGTTTACCCGCGCTTGCTTGAATTTCTTCACGTTGACATTCAGAGCACTGGGCAGAAATCACATCGCGTCAACACCCGTCCCGGGCCATCGCGATGCTTT	124	15	4	11	2
0030C	TAAAACAAAGCATCGCGATGGCCCGGGACGGGTGTTGACGCGATGTGATTTCTGCCCAGTGCTCTGAATGTCAACGTGAAGAAATTCAAGCAAGCGCGGGTAAACGGCAGGAGTAACTATGACT	124	5	4	1	2
0014A	TAAATTTGAATTCAATGATATAATATCACTGTATAAGAAAAACGATTCTGAGCGGAGACGGTTTGTCAGTCTAGGTATTAGACATACCTATTATAGGTATACTTATCTATAGTA	114	7	3	4	2
001EB	TAAGCCGCAGGCTCCACTCCTGGTGGTGCCCTTCCGTCAATTCC	44	6	4	2	2
0017D	TAAAGGAATTGACGGAAGGGCACCACCAGGAGTGGAGCCTGCGGC	45	6	3	3	2
00039	TAATAGAAGGGTCCACATATGTTGTTCTAACTCCCATTCAAAAATTATAAAAATACATAGGCACAATTTTTTTTTATAAGCA	82	13	11	2	2
00136	TAACCAGACAGATCGCTCCACCAACTAAGAACGGCCATGCACCACCACCCACCGAATCAAGAAAGAGCTCTCAATCTGTCAATCTTTCCGGTGTCCGGGCCTGGTGAGGTTTCCCGTGTTGAGTCAAA	128	7	5	2	2
00024	TAATTTGACTCAACACGGGAAACCTCACCAGGCCCGGACACCGGAAAGATTGACAGATTGAGAGCTCTTTCTTGATTCGGTGGGTGGTGGTGCATGGCCGTTCTTAGTTGGTGGAGCGATCTGTCT	126	15	7	8	2
0014E	TAAGTATTGGAGAAACGGGACGGAATTCCACCGCCACAGGTGTGCGTAATTA	52	7	5	2	2
00042	TAACCTAATTACGCACACCTGTGGCGGTGGAATTCCGTCCCGTTTCTCCAATAC	54	12	6	6	2
000D1	TAAGTATTGGAGAAACGGGACGGATTTCCACCGCCACAGGTGCGCGCAATTAGGTAATTATTTATACGGGACGAGCTGTA	80	8	5	3	2
002EF	TAAAAAATATTACGTATTGGAGAAACGGGACGGGATTCCACCGCCACAGGTGCTGAAATATAGTCCAAATTGTAGACGGGACGAGCTGTA	90	5	3	2	2
003FF	TAACTACAGCTCGTCCCGTCTACAATTTGGACTATATTTCAGCACCTGTGGCGGTGGAATCCCGTCCCGTTTCTCCAATACGTAAA	86	5	3	2	2
0005A	TAAAAACCTCGTCCGAGCGTCGGCCGTCGGTCAGAAAATTCTTCTCGAGGCACACCAATGTCAACGCGTAGTGGTACGGCAGCCGAA	87	10	4	6	2
001C4	TAAAATTCACATGCCATACCACTACGTACGGTGAAAATCATTTTTTTCAACTCCTCATGCCGTACCGCTACGCACGGTGGTGGAAATA	88	6	1	5	2
001F4	TAAAAACCTCGTCCGAGCGTCGGCCGTCGGTCAGAAAATTCTTCTCGAGGCACACCAATGTCAACGCGTAGTGGCACGGTAGCCGAA	87	6	4	2	2
00265	TAAATTCGGCTACCGTGCCACTACGCGTTGACATTGGTGTGCCTCGAGAAGAATTTTCTGACCGACGGCCGACGCTCGGACGA	83	6	5	1	2
00045	TAAATCCGGCGGGTAGTCCCGCCTGATCTGAGGTCGGAACGTATCGGTTGTTTGTTTC	58	12	8	4	2
000B2	TAAGAAACAAACAACCGATACGTTCCGACCTCAGATCAGGCGGGACTACCCGCCGGA	57	8	6	2	2
000BC	TAAAAAGAAAAATTTTTATGAATTTCTAACTCGAAATAATTTGCAAATTTTCGTGATTTTTCCATATTTTGTCATTTTTTGAAC	84	8	5	3	2
0000D	TAAAAACCTAGGATAACTATTTTAGTTATTTTGTTGTGATTGTATAATATTATTCGTGGGTACTTGAAACTTCTAAAGTATACTATTATATATCTATGATAGTACCACGGTTTTTTGTTGATGTATAACGCGTTATAAGTACCTAATAAATATTATGATATGA	163	24	17	7	2
0005E	TAATCATATCATAATATTTATTAGGTACTTATAACGCGTTATACATCAACAAAAAACCGTGGTACTATCATAGATATATAATAGTATACTTTAGAAGTTTCAAGTACCCACGAATAATATTATACAATCACAACAAAATAACTAAAATAGTTATCCTA	158	10	9	1	2
0009D	TAAATTTGAATTCAATGATATAATATCACTGTATAAGAAAAACGATTCTGAGCGGAGACGGTATATCAGTCTATGTATTAGACATATATATACTTATCTATGGTA	105	8	3	5	2
0003D	TAATACCATAGATAAGTATATATATGTCTAATACATAGACTGATATACCGTCTCCGCTCAGAATCGTTTTTCTTATACAGTGATATTATATCATTGAATTCAAA	104	12	8	4	2
00396	TAAATTTTTATGGGCGTTTGAAATTCATATTTTTACAACATTTGATATTCACTCGATTTCTTACGTAACAATTTTCTTATTTTGTTGTAA	90	5	5		1
0017A	TAAAAAGAAAAATTTTTATGAATTTATAACTCGAAATAATTTGCAAATTTTCGTGATTTTTCCATATTTTGTCATTTTTTGAAC	84	6	4	2	2
000D8	TAAACACGCTGATTCCTTCAGTGTAGCGCGCGTGCGGCCCAGAACATCTAAGGGCATCACAGACCTGTTATCGCTCAGTCTCGTGCGGCTATGTTCGTCCGCCGCCTGTCCCTCTAAGAAGA	122	8	6	2	2
00149	TAAACTCTTCTTAGAGGGACAGGCGGCGGACGAACATAGCCGCACGAGACTGAGCGATAACAGGTCTGTGATGCCCTTAGATGTTCTGGGCCGCACGCGCGCTACACTGAAGGAATCAGCGT	122	7	7		1
00089	TAATACAAGGTTTCTTATAAGTTGTTCTCACAGTGATAAAAAAAATCCAAAATCGTTAGTCACAATTTTTTTTTATAAGTGC	82	9	6	3	2
00210	TAAGCACTTATAAAAAAAATTGTGACTAACGATTTTGGATTTTTTTTATCACTGTGAGAACAACTTATAAGAAACCTTGTA	81	6	4	2	2
0006B	TAAAAGCTTAGTTATAAAAGAAAAAATTTTACGATTTTTCAACCACAAAATTACTTGCAAATTTTCGCAATTTTGACATATTTCGTATAAA	91	10	10		1
0021E	TAAAAGCTTAGTTATAAAAGAAAAAAATTTTACGATTTTTCAACCACAAAATTACTTGCAAATTTTCGCAATTTTGACATATTTCGTATAAA	92	6	4	2	2
0001A	TAAAGTTACACCAAAAACCAAAATCGATTTTCTCGAAAACAGATTTTGCGTAAAAATTCCCGTTTTTCC	69	16	9	7	2
002D0	TAAAGTTACACCAAAAACCAAAATCGATTTTCTCGAAAACAGATTTTGCGTAAAAATTCCCGTTTTCC	68	5	3	2	2
00012	TAAGGAAAAACGGGAATTTTTACGCAAAATCTGTTTTCGAGAAAATCGATTTTGGTTTTTGGTGTAAC	68	21	15	6	2
00055	TAATTCCATCCATTACAGTAACCCACTTGTAACCTACTGTACAGCAGAGCGACATCCACGACTTACCCGCC	71	10	5	5	2
0009B	TAAATTTGAATCCAATGATATTATATCATTGTATACGAAAAACGATTCTGAACGGAGATGATTTGTCAGTCTAGGATATATTA	83	8	8		1
0003A	TAAAAATAATATATCCTAGACTGACAAATCATCTCCGTTCAGAATCGTTTTTCGTATACAATGATATAATATCATTGGATTCAAA	85	13	7	6	2
001AA	TAAAAATAATATATCCTAGACTGACAAATCATCTCCGTTCAGAACGTTTTTCGTATACAATGATATAATATCATTGGATTCAAA	84	6	2	4	2
0012F	TAAAAACTTAGTTATAAAAGAAAAATTTTTACGATTTTTCAACCACTAAATTACTTGCAAATTTTCGCAATTTTGACATATTTCGTATAAATTTGAAC	98	7	7		1
0002F	TAAAGTTCAAATTTATACGAAATATGTCAAAATTGCGAAAATTTGCAAGTAATTTAGTGGTTGAAAAATCGTAAAAATTTTTTCTTTTATAACTAA	96	13	6	7	2
0000B	TAATACAAGGCTCCTAACATATTTTTACAATAGCAGTTGCAAAATAAAAGGAATACATTGTCACAATTTTTATTTATAAGCA	82	25	17	8	2
0002B	TAAGAGGACGCCACACCCGCATTTGTTGTCTCCGTCTTACAAACGCGTAACATAGCAAATTTACGCTCAGCAGTTCACGTTTTATGCCGTTAGC	94	14	9	5	2
001E3	TAAGAGGACGCTACACCCGCATTTGTTGTCTCCGTCTTACAAACGCGTAACATAGCAAATTTACGCTCAGCAGTTCACGTTTTATGCCGTTAGC	94	6	4	2	2
00112	TAATACTGTCCATTATACAGTGACCCACTTCTAACCTACTGTACAGCAGAGCGACATCCACTTACCCACC	70	7	4	3	2
00217	TAAAAACCTAGGATAACTATTTTAGTTATTTTGTTGTGATTGTATAATATTATTCGTGGGTACTTGAAACTTCTAAAGTATACTATTATATATCTATGATAGTACCACGGTTTTTTGTTGATGTATAACGCGTTATAAGTACCTAATAGATATTATGATATGA	163	6	4	2	2
00054	TAATACCATCCATTATACAGTGACCCACTTGTAACCTACTGTACAGCAGAGCGAAATCCACTTACCCACC	70	11	9	2	2
00010	TAAATTTGAATTCAATGATATAATATCATTGTATAAGAAAAACGATTCTGAGCGGAGACGGTATGTTAGTCTAGGTATAAGACATAATATTATATTAGGTACCTATAATAAATTCCAAA	119	21	15	6	2
000AF	TAATTTGGAATTTATTATAGGTACCTAATATAATATTATGTCTTATACCTAGACTAACATACCGTCTCCGCTCAGAATCGTTTTTCTTATACAATGATATTATATCATTGAATTCAAA	118	8	2	6	2
00018	TAAGGAAAAACGGGAATTTTTACGCAAAATCGATTTTTCACAAAATTGAATTTGGTTTTTGGTGTAAC	68	17	12	5	2
000C1	TAAAGTTACACCAAAAACCAAATTCAATTTTGTGAAAAATCGATTTTGCGTAAAAATTCCCGTTTTTCC	69	8	7	1	2
003C9	TAAAGTTACACCAAAAACCAAAATCAATTTTCTCGAAAACAGATTTTGCGTAAAAATTCCCGTTTTTCC	69	5	3	2	2
000A8	TAAAGTTCAAATTTATACGAAATATGTCAAAATTGCGAAAATTTGCAAG	49	8	7	1	2
00239	TAAATTTGATAATAGGTCAATTCACTCTAATATAAAAACTAACAGCACACAATTGAATCTTCTGAACGAACATTTGCTATAACGTACGTGTGTAAGACGGAGACAACACATGCGGGTGCGACGTCCT	127	6	5	1	2
00064	TAAGAGGACGTCGCACCCGCATGTGTTGTCTCCGTCTTACACACGTACGTTATAGCAAATGTTCGTTCAGAAGATTCAATTGTGTGCTGTTAGTTTTTATATTAGAGTGAATTGACCTATTATCAAA	127	10	7	3	2
0041E	TAAGAGGACGTCGCACCCGTATGTGTTGTCTCCGTCTTACACACGTACGTTATAGCAAATGTTCGTTCAGAAGATTCAATTGTGTGCTGTTAGTTTTTATATTAGAGTGAATTGACCTATTATCAAA	127	5	2	3	2
00001	TAAAGAAAAACTGACGTATGCGAAAACAGCGTCTCGTTTTGGCGTAGGGATGGCGAGTCTTATGCGCTGGAATCGCCGCATAACGCCTTGCACGACGCACAATAAACCGGCTACCAAAATAGATATGGAAGCGCTGGCACAAGATGTCGCTACTTATCCTGATGATTACCAATACGAACGGGCTCAACGTTTTGGCGTCAGTGCTCAAGGGATTCGTCATGCCTT	225	49		49	1
00002	TAATCAGGATTTGTTGCCTAAGGTACCTCGTAATGCCGTTATTGTGATGGATAATGTTAGTTTTCACAAACGTCAGGATATACAACATTCAATAAAAAATGCCGGATTTACCCTCGAATATCTTCCTGTTTATTCCCCTGATCTCAATCCCATTGAGCATAAATGGGCTCAAGCTAAAGCACGTCGGAGGAAATACAGATGTGATGTCGATACTCTGTTTTCTACCTCCTTATTTTGAATCAATTTATATA	251	45		45	1
00003	TAAGAGATAACCGTTTATGCAAAGCGCTAGTGGGGCTATCGTTGGAAGAA	50	44	13	31	2
00004	TAAGGCATGACGAATCCCTTGAGCACTGACGCCAAAACGTTGAGCCCGTTCGTATTGGTAATCATCAGGATAAGTAGCGACATCTTGTGCCAGCGCTTCCATATCTATTTTGGTAGCCGGTTTATTGTGCGTCGTGCAAGGCGTTATGCGGCGATTCCAGCGCATAAGACTCGCCATCCCTACGCCAAAACGAGACGCTGTTTTCGCATACGTCAGTTTTTCTTT	225	36		36	1
00005	TAAAGCGCCTTCGGGTGAGTCGAAAAAAAAACACTTCAGCATCCCAAAGCTAACGCCAAGGAGCGAGAAAATTTTCAAGCCACTATCCAAGCCTATCAAGCAGCGGATAGACCCATTATTTATATTGACGAAAGTGGCTTCGCGCAGGATAGGCCAAGGCTCTACGGCTATTCACCTAAGGGAAAAAGATGTTATGGCAAAAATGATTGGCTGGCGAAAGGCAGA	225	35	5	30	2
00008	TAAAGCGCCTTCGGGTGAGTCGAAAAAAAACACTTCAGCATCCCAAAGCTAACGCCAAGGAGCGAGAAAATTTTCAAGCCACTATCCAAGCCTATCAAGCAGCGGATAGACCCATTATTTATATTGACGAAAGTGGCTTCGCGCAGGATAGGCCAAGGCTCTACGGCTATTCACCTAAGGGAAAAAGATGTTATGGCAAAAATGATTGGCTGGCGAAAGGCAGA	224	29	5	24	2
00009	TAATATTATCGGCGCTTTACTGGAAGGAACGCTGATAACCCTCTGTGCTTTCCAGTGCAATATCGATAGCGAATTTTTCATGCCTGGA	88	29	4	25	2
0000A	TAATTCTTCCAACGATAGCCCCACTAGCGCTTTGCATAAACGGTTATCTC	50	28	7	21	2
0000C	TAACAGACGGTCTTTATTGAGCATTTTGGGTTCTCTTAGCCTAACACTCTCATTATTTTCTATAACACGATCGAAAATGCAATAGGCTTA	90	24	5	19	2
0000F	TAACTCTGCCTTTCGCCAGCCAATCATTTTTGCCATAACATCTTTTTCCCTTAGGTGAATAGCCGTAGAGCCTTGGCCTATCCTGCGCGAAGCCACTTTCGTCAATATAAATAATGGGTCTATCCGCTGCTTGATAGGCTTGGATAGTGGCTTGAAAATTTTCTCGCTCCTTGGCGTTAGCTTTGGGATGCTGAAGTGTTTTTTTTTCGACTCACCCGAAGGCG	224	22	6	16	2
00011	TAATCCAGGCATGAAAAATATCGCTATCGATATTGCACTGGAAAGCACAGAGGGTTATCAGCGTTCCTTCCAGTAAAGCGCCGATAATA	89	21	6	15	2
00013	TAAAGAAAAACTGACGTATGCGAAAACAGCGTCTCGTTTTGGCGTAGGGATGGCGAGTCTTATGCGCTGGAATCGCCGCATAACGCCTTGCACCACGCACAATAAACCGGCTACCAAAATAGATATGGAAGCGCTGGCACAAGATGTCGCTACTTATCCTGATGATTACCAATACGAACGGGCTCAACGTTTTGGCGTCAGTGCTCAAGGGATTCGTCATGCCTT	225	21		21	1
00014	TAAAGAAAAACTGACGTATGCGAAAACAGCGTCTCGTTTTGGCGTAGGGATGGCGAGTCTTATGCGCTGGAATCGCCGCATAACGCCTTGCACGACGCACAATAAACCGGCTACCAAAATAGATATGGAAGCGCTGGCACAAGATGTCGCTACTTATCCTGATGATTACCAATACGAACGGGCTCAACGTTTTGGCGTCAGTGCTCAAGGGATTCGTCATG	221	20	20		1
00015	TAATAAGCCTATTGCATTTTCGATCGTGTTATAGAAAATAATGAGAGTGTTAGGCTAAGAGAACCCAAAATGCTCAATAAAGACCGTCT	89	19	5	14	2
00016	TAAAAAGAAAGAAGCCCTCACTTATGCTGAAACCGCCGACCGTTTTGGTGTAGGAAGTGCCAGTTTGATGCGATGGGCGAAACGCCTGGAGCCTTGTTTGACGCGTAATAAACCCGCTACCAAAATAAACAGAGCGGCGTTGATTCTGGATGTGGAAACCTATCCTGACGCGTCTCAACACGAGCGAGCGCAACGGATGGGTGTGAGTGCCAGGGGTATCTGTGATGCCTT	231	18		18	1
00017	TAACTCTGCCTTTCGCCAGCCAATCATTTTTGCCATAACATCTTTTTCCCTTAGGTGAATAGCCGTAGAGCCTTGGCCTATCCTGCGCGAAGCCACTTTCGTCAATATAAATAATGGGTCTATCCGCTGCTTGATAGGCTTGGATAGTGGCTTGAAAATTTTCTCGCTCCTTGGCGTTAGCTTTGGGATGCTGAAGTGTTTTTTTTTTCGACTCACCCGAAGGCG	225	18	2	16	2
00019	TAACTTATCGTAAAAATAACCGTGTAGCACATCAACGGAAAATGGGGGCAGGCCAGAAAGGATTTTTACCAACCCCATTGGATAAACTGGTTTTTATTCTGTTGTA	106	17	3	14	2
00025	TAAATACAACAGAATAAAAACCAGTTTATCCAATGGGGTTGGTAAAAATCCTTTCTGGCCTGCCCCCATTTTCCGTTGATGTGCTACACGGTTATTTTTACGATAA	106	15	4	11	2
00027	TAATCCAGGCATGAAAAATATCGCTATCGATATTACACTGGAAAGCACAGAGGGTTATCAGCGCTCCCTCCAGTAAAGCGCCGATAATA	89	15	2	13	2
00031	TAAGGCATCACAGATACCCCTGGCACTCACACCCATCCGTTGCGCTCGCTCGTGTTGAGACGCGTCAGGATAGGTTTCCACATCCAGAATCAACGCCGCTCTGTTTATTTTGGTAGCGGGTTTATTACGCGTCAAACAAGGCTCCAGGCGTTTCGCCCATCGCATCAAACTGGCACTTCCTACACCAAAACGGTCGGCGGTTTCAGCATAAGTGAGGGCTTCTTTCTTTTT	231	13		13	1
00033	TAATATTATCGGCGCTTTACTGGAGGGAGCGCTGATAACCCTCTGTGCTTTCCAGTGTAATATCGATAGCGATATTTTTCATGCCTGGA	89	13	3	10	2
0003C	TAAATGATTCTTATATGGACGTAATGCTTCAGTAACCATATATGGTCCTAAATCAGATCCACCAATTCCAATATTTACAATATTAGAAATAGATTTTCCCGTATAACCTTTCCATTCTCCATGAATAACCATTTTTGAAAAATTTTTCATTTTTTCCAACAACGCA	166	13	11	2	2
0003E	TAATCACGCAACTCTGTATCATCGCGCGCATTTGTTCATTTTTGGTCACCTTACTGGCGCGCTTTACCTGACGTGTGGCCACATCACAGAATTGAACCGGCTTTTTCACTATTTCAAAGGCAACAGGTATGGATACTCCTCCACTGTGATACAGCGCA	158	12	7	5	2
00040	TAACAGACGGTCTTTATTGAGCTTTTTGGGTTCTCTTAGCCTAACACTCTCATTATTTTCTATAACACGATCGAAAATGCAATAGGCTTA	90	12	5	7	2
00041	TAAAGCGGGCAGGTTTTAGCTATAAAAAAAACATTTTATCACCCCAAAGCCGACGTCCAAGCTCGAAAAGATTTTCAGACTAAGCTCCAGGGCTATGAAGCCTGTGATACCCCAATAATTTACGTGGATGAAAGCGGTTTTGCTCATGATATGCCGCGTCTTTATGGTTATTCAGTGAAAGGGAAGCGCTGTTACGGCCAACACGATTGGCATGCCAAAGCACGTACTAATGTCATTGGTGCACAGCTT	249	12	1	11	2
00043	TAATAAAAACAGACCGTTTTTGGGGCATTTTTGGAGGTCGTTTTTGTATTACCTAGTGTGAGAAAGTCGCTTAGAGGCCGTTTTAGAGCCCCTATGTTGC	100	12	1	11	2
00047	TAATAAAGCTAAAGCATTATGGACATTGAATAAATCCTCTATTACAGAAGAAGAATATAAAGATTTTTATAAACATCTCACCAATGATCAAAATGATCCTCTTATATGGAGTCATAATCACGTAGAAGGCAATCAAGAGTATATTAGTTTATTATATATTCCTGAAAAAGCTGCTTGGGATATATGGAATAGAGATAATAAACA	204	12	9	3	2
00049	TAACGATTAGTTGCGGACTATTAGCACACCACTTACGAAGAGTCATTCCTGCTGACTGGAGTATCATAGTGACTTCTCTTTGGATTTCTTGACATCTGCTGATTGAATGAGAACCTGTTATTAGGTCGTCGACATAGAAATCTTGTCTGATGACTTGAGCTGCCTGTGGATGTTTTGCTTTGTTTATGTTTGCAAGTTCTTGTAAACACCGTGTAGCTTGGAAAGGAG	228	12	5	7	2
00052	TAATCAGGATTTGTTGCCTAAGGTACCTCGTAATGCCGTTATTGTGATGGATAATGTTAGTTTTCACAAACGTCAGGATATACAACATTCAATAAAAAATGCCGGATTTACCCTCGAATATCTTCCTGTTTATTCCCCTGATCTCAATCCCATTGAGCATAAATGGGCTCAAGCTAAAGCACGTCGGAGGAAATACAGATGTGATGTCGATACTCTGTTTTCTACCTCCTTATTTTGAATCAATTTATATATTG	254	11	11		1
00058	TAAAGAAAAAGAAAAACTGACGTATGCGAAAACAGCGTCTCGTTTTGGCGTAGGGATGGCGAGTCTTATGCGCTGGAATCGCCGCATAACGCCTTGCACGACGCACAATAAACCGGCTACCAAAATAGATATGGAAGCGCTGGCACAAGATGTCGCTACTTATCCTGATGATTACCAATACGAACGGGCTCAACGTTTTGGCGTCAGTGCTCAAGGGATTCGTCATGCCTT	231	10	2	8	2
00061	TAATGATGCTTTGCCATGGAATATTTCACCTGCATATCCGATAATGCCGCCATACGCTTCTACTATTGCTTGATGACCTAAACAAATTCCTACTATAGGAATGTCCCCCTTGACTTTTTTTA	122	10	3	7	2
00065	TAACTTATCGTAAAAATAACCGTGGAGCACATCAACGGAAAATGGGGGCAGGCCAGAAAGGATTTTTACCAACCCCATTGGATAAACTGGTTTTTATTCTGTTGTA	106	10	3	7	2
00068	TAATATTATCGGCGCTTTACTGGAAGGAACGCTGATAACCCTCTGTGCTTTCCAGTGCAATATCGATAGCGATATTTTTCATGCCTGGA	89	10	3	7	2
00069	TAAAGAAAAAGAAAAACTGACGTATGCGAAAACAGCGTCTCGTTTTGGCGTAGGGATGGCGAGTCTTATGCGCTGGAATCGCCGCATAACGCCTTGCACCACGCACAATAAACCGGCTACCAAAATAGATATGGAAGCGCTGGCACAAGATGTCGCTACTTATCCTGATGATTACCAATACGAACGGGCTCAACGTTTTGGCGTCAGTGCTCAAGGGATTCGTCATGCCTT	231	10	2	8	2
0006E	TAATATTTTTTGTATCTGCTGTAGCTTCAGTGTTTGTTTCTAGAATCAATGCATCATCATCAGTATTTCTTGTAAAAATTATTTCAAATCTAGCATTGTAAATTTGTTTTATTTCTTTCATTGACCCTAAACCTAAGTGTGATAAAGGAATGATGAGCTCGACACTTCCTCCCCCTTCAGATGTAGATTGAAAACCTGAATTTTGTGTAGGACCATTTCCATCAACAGCATAACTCATATAACCTTTT	248	9	7	2	2
00070	TAAGGCATGACGAATCCCTTGAGCACTGACGCCAAAACGTTGAGCCCGTTCGTATTGGTAATCATCAGGATAAGTAGCGACATCTTGTGCCAGCGCTTCCATATCTATTTTGGTAGCCGGTTTATTGTGCGTGGTGCAAGGCGTTATGCGGCGATTCCAGCGCATAAGACTCGCCATCCCTACGCCAAAACGAGACGCTGTTTTCGCATACGTCAGTTTTTCTTT	225	9		9	1
00071	TAAGGAATGGTATCGAGCAACAGGTAGTGGTTGCGGTACACCCTCAAACATCTCTAAACCATCATGGCGGA	71	9	6	3	2
00073	TAATAAAAAAATAATTTAGAAAGTATAATGATTGTCGATAGCGCGATACGCGTCTCTGCTGTCAAGAATTCA	72	9	5	4	2
00075	TAATATTATCGGCGCTTTACTGGAGGGAGCGCTGATAACCCTCTGTGCTTTCCAGTGTAATATCGATAGCGAATTTTTCATGCCTGGA	88	9		9	1
00077	TAATAAGAAATCGGCGGAAAGATAAAGAATATGTTCGTCGTTCGACGGAAATATTATTTTCAACCCGTATAATAATATAAGGTACACTTACACTTACCTATAGTCTACACACGACACGCGTACGTCTATATATTATATAGGTACTTGGAATGGCGACGCAGCCACCGCTAATCACTAATTTGCGTTCTAATAATTTGTTACAAAATTGAAAATACCATATACAA	224	9	4	5	2
0007B	TAAGGCATGACGAATCCCTTGAGCACTGACGCCAAAACGTTGAGCCCGTTCGTATTGGTAATCATCAGGATAAGTAGCGACATCTTGTGCCAGCGCTTCCATATCTATTTTGGTAGCCGGTTTATTGTGCGTCGTGCAAGGCGTTATGCGGCGATTCCAGCGCATAAGACTCGCCATCCCTACGCCAAAACGAGACGCTGTTTTCGCATACGTCAGTTTTT	221	9	9		1
0007D	TAAATACAACAGAATAAAAACCAGTTTATCCAATGGGGTTGGTAAAAATCCTTTCTGGCCTGCCCCCATTTTCCGTTGATGTGCTCCACGGTTATTTTTACGATAA	106	9	1	8	2
0007E	TAATTCTGCACCTGCATCTTTAGCTATTGCAATATTATCACCTTGTGTAAATACAGCTACTCGAATAGAACGGCCGATACCATTTGGTAATACTGTTGAGCTTCGAATATTCTGATCGGATTTTTTAGAATTTATACCTAAA	142	9	6	3	2
00083	TAAGAGAATTGATATCTAATTCATCAGATGCAATAGATAAATTACGATTTGAATCTATATCCTCACCAGAATTATATGAAAATGATAGTGATGTAAAAATTCAAATATCTATAAATAAAGCACAAAGAACATTGATCATTAGTGATAATGGCATTGGAATGACAAAAGAAGACACCATTGAAAATCTTGGAACAATTGCTAAATCAGGAACAAAATCATTTCTCCAATCT	230	9	9		1
00084	TAAAGAACTTTCTGGAGATGCACCGAATAGTATGAAATCTTCATCTTGCATAAAAAACATATAGGGACTGGGATTGC	77	9	2	7	2
0008B	TAAATACAATAAAAATAACAGGTGTGATCCCGCACACACACAGTACCACCGCTAACCTACTCACAGAAGTCACCTCTCACCATAGACAACACTGAGTCTGCTACCAGTACCGACTACCGGGAACGCTGAGCGTTGAGCCAACCATGACCGTGCAGCAGGGCAGGTAAACAGACGAACAGTCAAAGTATACCTCGTGTCATCCTAGACTAGGAAAGAATAATGATAATGTGACATTG	236	9		9	1
0008F	TAATAAGCCTATTGCATTTTCGATCGTGTTATAGAAAATAATGAGAGTGTTAGGCTAAGAGAACCCAAAAAGCTCAATAAAGACCGTCT	89	9	1	8	2
00097	TAACTGAAGGTGAAGATGAACAAGATCCAGTTTCACATCTTGCTCGTTCTGTATTAGATGGACATATTATGTTGTCGCGTTATTATGCTGATTTAGGCCATTATCCTGCTATTGATATTGAATCTTCTATTAGTCGTGTTATGCCTAACATTA	153	8	5	3	2
0009F	TAAACAACATGCAAAAAGTGGAGAAGATATATTTGGAGACGGTGTTTTAGAAATACTACAAGATGGATTTGGCTTTCTACGTTCTGCAGATAGCTCTTATTTAGCTGGTCCTGATGATATTTATGTTTCACCGAGTCAGATTCGTAGA	148	8	7	1	2
000A0	TAATATTATCGGCGCTTTACTGGAGGGAGCGCTGATAACCGTCTGTGCTTTCCAGTGTAATATCGATAGCGAATTTTTCATGCCTGGA	88	8		8	1
000A1	TAACTAGATCGGAAACATACCTAGATCCCGGCTCACAAATACGTGCAAGATCATTTCTTGCTAAGTCAACCAGCATCAAATGTTCAGCAAGTTCTTTATGATTAGTTCTCATTTCAAGTTCTATTCTGCTGTCTAAATCGAGATCTAAAGTTCCGTCTTTTTTTCTACCTCTGGGTCTGGTTCCAGCAATAGGATAGAGCTCAATTTGTCTATTTTTTTCATCATATTTT	230	8	3	5	2
000A6	TAATCAATTCTTGTTGTGGTTTGTATGAAGTAAAAATTACACCACCTTTCCTTGAATAATTTTCTCTTTTTCATACTTTCTATTTTTTCTAATGTATTTTTTGTGATTTTTCCTCTTGTTTTTGGGAACATCAACACTGTTTTCAAACTTCTTTTCAATAATTTCGGGTACGGTTTTA	178	8	2	6	2
000A7	TAATAATAGAAGTAGCTTCTTTGACTTTTTCAACTTGATACCCAAATCCAGAACAACCCGTTGAATAAGACAACATTGCAATACGTGGTTCTATTCCAAACATTTTTGCTGAATCTGCAGATTGAATGGCAATTACTGCTAATTCTTCTGCAGTAGGA	158	8	3	5	2
000AB	TAAAGAAAAACTGACGTATGCGAAAACAGCGTCTCGTTTTGGCGTAGGGATGGCGAGTCTTATGCGCTGGAATCGCCGCATAACGCCTTGCACGACGCACACAATAAACCGGCTACCAAAATAGATATGGAAGCGCTGGCACAAGATGTCGCTACTTATCCTGATGATTACCAATACGAACGGGCTCAACGTTTTGGCGTCAGTGCTCAAGGGATTCGTCATGCCTT	227	8	1	7	2
000BA	TAATCGAATTTCTTATAATGTAGAAGCTGCTCGAGTAGAACAAAGAACAGATTTAGATAAATTAGTTATTGAGATGGAAACTAACGGAACTATTGATCCAGAAGAAGCTATTCGACGAGCAGCTACTATTTTAGCAGAACAACTAGAAGCATTTGTTGA	159	8	5	3	2
000BB	TAATAATACGTTCTATTAGATCTTCGATGCCTTCTCCAGTTTTAGCTGAACATCTAATTGCATCCAATGCAGGTATTCCTATAATATCTTCAATTTCTTTAGCTACTTTGTCTGCATTTGAATTAGGTAAATCTATTTTA	140	8	3	5	2
000BE	TAAAATAGATTCAGGATGAAATTGAAAGCCGCAAACACGATCACAATTGTTTCTTACAGACATAATCATTTTTTCAAAATAGGAA	85	8	3	5	2
000C0	TAATACATGGAGGCGGTCATGAAAGAGGGATGCGTTCAGGAACTTTACCGGTTCATCAAATTGTAGGCATGGGCGAATCATTTGTATTGGCTAAAAGAAAAATACATGACGATTTTATTCA	121	8	6	2	2
000C2	TAAGAGGATGCTACGCCCGCATGCGCTGTTTCCGTCTTACAAACGCTAATTGCACATTCTGAATAATCTATTTGACTCTGTTATTA	86	8	6	2	2
000C4	TAATGAATTTATTAGACACCCCTGGTCATCAAGATTTTTCGGAAGATACATATCGTATTCTTACTGCCGTAGATTGCTGTTTAGTCGTAATTGATGCTGCTAAAGGTATAGAAGAACGAACTAGAAAACTAATGGATGTTGCGCGTATTCACAACACTCCCATTATTACTTTTA	174	8	6	2	2
000C5	TAATTCCCGTCACGCCGTCATGAGGTGATAGAAATAATTTTTCAATACTAGCAACAGTTTCATCAAGAATTTGTTCAACATTTTTTGGTCCTGAGTCTTTTTTGAAACGTTTTTCTGCAA	120	8	6	2	2
000C6	TAACGTTGTATATGGTATTTTCAATTTTGTAACAAATTATTAGAACGCAAATTAGTGATTAGCGGTGGCTGCGTCGCCATTCCAAGTACCTATATAATATATAGACGTACGCGTGTCGTGTGTAGACTGTAGGTAAGTGTAAGTGTACCTTATATTATTATACGGGTTGAAAATAATATTTCCGTCGAACGACGAACATATTCTTTATCTTTCCGCCGATTTCTTA	226	8	4	4	2
000C9	TAATGCAACAGAATAATGTATAGGATTAGTGATAATTACATCAGCTTTAGGAGTATTGATAATCATTCTTCTGCGCATAACAGCTTTCATTGCTTGACGAATCCGCATTTTTATATTTGGATTTCCTTCTTTTT	134	8	7	1	2
000CD	TAATGCGTTGTTGGAAAAAATGAAAAATTTTTCAAAAATGGTTATTCATGGAGAATGGAAAGGTTATACGGGAAAATCTATTTCTAATATTGTAAATATTGGAATTGGTGGATCTGATTTAGGACCATATATGGTTACTGAAGCATTACGTCCATATAAGAATCA	165	8	5	3	2
000D3	TAATGCATGTGTTCCTTTATCTGAAATGTTTGGTTATGCTACTGATTTACGTTCTCAAACTCAAGGAAGAGCTTCTTATTCGATGGAA	88	8	5	3	2
000D7	TAAATCTATTGGATATCCTAGATCGAGAAGTTTTTGCATTTCTTGGAAGATCAAGCGATGGGGTTTACTAAAAAAATCATCAGCAACTACATGTTCTGAAACGCTATCCCATTGTTCATTATCTAACATCAACCCACCCAATACCGATTGTTCTGCTTCTAAAGAATGTGGTGGGA	176	8	6	2	2
000DE	TAAATTCTTTTGCAACTCCGCCTGATTTTTGAATTTCCCCGCAAATAAGTTTACCAACTTCCTGTAAGTGAATATGTCCTGGAACAAATTGAGAAAACGAATTTACTACTGCAATAATTGGTTTTGTAAAATCTTTCTCAGTCATACCTGTAGCACGCCATAGTGATCTTGCTCCAGACATATTTCTACCCTGAGTGGTTGTGAAAGAACGATATTTAGGCATTTTAGAGAACTCCAAAAATAAAAATTTTACAAAAACTATTT	264	7	5	2	2
000DF	TAAAAAATTTTCATTGTGTATATTTGATTTTGTCATTCCAATTGCATGAGAATCATTGTTGTATGTTTTTGTTTTCAGGCACGTCTGGATGTTGAATTGTGTAATGCGATGACGCAGGAGGATTCAGTGTTATAAAAAGGGATATGGAA	149	7	3	4	2
000E0	TAATATTATCGGCGCTTTACTGGAGGGAGCGCTGATAACCGTCTGTGCTTTCCAGTGTAATATCGATAGCGATATTTTTCATGCCTGGA	89	7	3	4	2
000E1	TAAAATAAAGGTGCAGAAAACAAGGTATCGATATCACATTGGCGCTTTCTGCGAAGGGCTTTTGCTTGAGCCCATTTATGCTCAATGGGATTCATATCAGGAGAATAAGTAGGAAGATATTCCAGAATAAAGCCGGCTTTCTGTATAGCAGCCTGGGTGTCTTGACGTTTATGGAAGCTGACATTATCCATTACGATGACAGCCCCTTGGGGAGATTTTGGTAGTAAGTCTTGCATG	237	7		7	1
000E5	TAATCGCGGTGATTTTTTTGTAAATATTGATTCTATATTACAACCTTCCCAAGAAGCTATCATAGATATTGTTTGGATGACAGATAATATCTTATTAGCAGGGGAATCATATAATGTCAAGTTGTCTGGTAAGAAAATACGTGTTTACA	149	7	7		1
000E8	TAACATGGCACTTATCGGAAACCCACCGCCTAAAGATTTAGCAATA	46	7	6	1	2
000EF	TAAAATAAAGGTGCAGAAAACAAGGTATCGATATCACATTGGCGCTTTCTGCGAAGGGCTTTTGCTTGAGCCCATTTATGCTCAATGGGGTTCATATCAGGAGAATAAGTAGGAAGATATTCCAGAATAAAGCCGGCTTTCTGTATAGCAGCCTGGGTGTCTTGACGTTTATGGAAGCTGACATTATCCATTACGATGACAGCCCCTTGGGGAGATTTTGGTAGTAAGTCTTGCATGACCCAGG	244	7	1	6	2
000F2	TAATTTTTGTAATTTTTTTATTGTAGATGAATATTGAAAATCACTTATATTGGAAGTCAATTGAACTGGTACAGTTGTCTTATTTTTAGGAATGGATGTCAATTTTTCTTCCAGTTTCTTTTCTATTTCTTCTGTT	136	7	4	3	2
000F3	TAAACGGCACGTCATAGCGGTTGGCGAACCAGTTGTTCGAACGCCGCGCGACGCTCGCTATGACGTACC	69	7	4	3	2
000F7	TAAAAATTATAAATCGTATATTACCTACACAAAATGAAATAAATAATAATCCTAGAGCTCGCAGCTCCGTACTTCGTATCGCAGAAATACAAGAATAAATATGAAAATTCAACGTTATGATTTACCTAAAATCATCAAAAATGATTTTCTTTTATATGGGAAAATTCA	168	7	6	1	2
000F8	TAAGTGGTAGAGTATTTCCTGTTTTTATAGGTGCACGCAAACCAGAAATTATAGTATCACCTATCTTTATACCTTTTGGAGCTAAAATATACTTTCTTTCACCATCTTTATATAATA	117	7	5	2	2
000F9	TAAATCAGGACTTCGTTCAATAGAATCAAAATGTAAATTAGAACAACCTCCTGGACAACATGGTATTCGAAAACCTAGATTATCTGATTATGCTATTCAATTACGCGAAAAACAAAAAGTGCGTCGTTTATACGGTGTCTTAGAACGTCAA	151	7	7		1
000FC	TAAGAAGTAGTGTAGTAAATGATTTTACTATAAATTATTCTTGGATATATGATAATCTAGAATATCTTTATTTTCCTACCTCTGGCAAACAAGCATATCTCACTGGAAAAACTACTCTTCCGGGTTCTGATGATAATTTTTATAAAATAACATTAGATAGCAGTCAATATATCCCA	176	7	6	1	2
000FE	TAATAAAACCGTACCCGAAATTATTGAAAAGAAGTTTGAAAACAGTGTTGATGTTCCCAAAAACAAGAGGAAAAATCACAAAAAATACATTAGAAAAAATAGAAAGTATGAAAAAGAGAAAATTATTCAAGGAAAGGTGGTGTAATTTTTACTTCATACAAACCACAACAAGAATTGA	178	7	2	5	2
00105	TAATAAGACATTCTCTGATATCGAATAAGCTTGACGTATTTCTTTTTCATTTTGACCAATATAAATATTTTTCTGATCATCATACCATACTGGAATACGGTGACCCCACCATAACTGTCGAGAAATACACCAATCTTCAATATTATTCATCCAAGATGAATACATACTTTCATATTGTTGTGGTATAAA	189	7	6	1	2
00109	TAATGGACAGCTGGTTTTCTGCCAAAGAGAATTTCGACTTTATTGTGCAAAAAAAGAAGCATTTTATCGCCGCTCTGAAAGAAAATCGTCTGGTCGCGTTGAGTGAAGAAGAGAGGAAACAAGGGCGTTTCGTCCGTATGAGTTCACTGGAATTATCAGATCAACAAGGGGTGCGAGGCTGG	182	7	2	5	2
0010C	TAATGTTCTCGTCATACCGGAACGAAATCCTGCTAAGTGTGTTCCGCCATCTTTTTGTGGTATATTGTTAGTAAAACATAATATATTCTCTTGATGAGAATTATTCCACTGCATAGCAATTTCTAGTTCTATTTGATCTTTTGTAGATCGAAAATAAAATATATGTGTATGAATAGGTGTCTTTTTTGCA	190	7	6	1	2
00110	TAAAAAGAACCGGTCTACCCATAAAGGGACCGAAAAACATGTCTGCTGCTTCATATCTTCCCTATATGATGAGAGATAAAAAAGTAATTTCGGGAGAAATGAGATTAGTTTTACCACTTTCTATTGGAAAAGCAGAAATTTATAGCAATATAGATAAAAATATTA	165	7	4	3	2
00113	TAATAGAAATTCGAGAATCTCGTCCGATTTCTAAAACAAAATCTTGGGTCCTAGTTCGTATTATTGAAAAAACAGTA	77	7	7		1
00114	TAATATTCCAAAATCAGTTAGATAATACAAGTAAATACAATCTTCTTTCAGAGAGATAACAAACAATATATTATATTTATAATTCATTTTTGCAGCATGACAACCTTCTATATTATAGATAATCTGTATTGGATTCTGAGGTATACCAAATTTA	154	7	5	2	2
00115	TAAACGAGGACAGCTACAAGGACTCAACGCTCATCATGCAATTGTTACGTGACAACTTGACTTTATGGACGTCTGATACGCAAGACAACGATGAGCCCCAGGAAGCCACTGGAGACAACTAACTCTTTTACTAAAATA	138	7	2	5	2
00116	TAAAGCTCTGAACTGAAGCCCCGGTAAACGGCGGCCGTAACTATAACGGTCCTAAGGTAGCGAAATTCCTTGTCGGGTAAGTTCCGACCTGCACGAATGGCGTAATGATGGCCAGGCTGTCTCCACCTGGGACTCAGTGAAATTGAATTTGCTGTGAAGATGCAGTATATCCGCGGCAAGACGGAAAGACCCCGTGAACCTTTACTATAGCTTGACACTGAATTCTGAA	229	7	4	3	2
00117	TAATGAGAGTCCCTTCTTTATCCGAAAACCGTACTCTTGAAATTGCAGAAATATCTAGAACATTGAAAGCATTGGCAAAAGAACTACAGGTTCCAGTAATAGCATTATCACAAC	114	7	6	1	2
00118	TAAGAGGATCCCATTGTAAAATGTGCTTTTTTTATAGCATTTATTACAGCTTGCGCCTTGTTTACACTCTCTTTCACTTCGTCTTCAGGTATTGAA	96	7	3	4	2
0011F	TAAAACAACCTCATTTATTACGAAAAGTTCGACGAAACATTGCACAAGTAAAGACTTTGCTAGATTCAAAGGAAGAGATAAAATAATGGAAAAAATTCGAACCTTACAAGGTCGTGTGATAAGTAATAAGATGCAAAAATCTGCTGTTGTAGCAATTGAACGTTTTGTAAAACATATTATTTATGGAAAATTTA	194	7	7		1
00124	TAATAGCCGGTCCAAAAGTATATATATGTGACGAATGTATAAGGTTATGTAATGATATTATCACCGAAGAAACTATCAAACAAAATAATATAACTGATACTGAAAATAAAATAAATTACTTACCTAAACCACATGAAATAAAAAAACATCTTGATAATTATGTTATAGGACAAAATTATACAAAAAAAGTCCTCTCTGTTGCAGTTTATAATCATTACAAACGTCTTTATAA	232	7	3	4	2
00127	TAATCTTTTTCTTTGATCCAAATTTTTCTTCTTTCCACGCGTTGTCATAAAAAGCAGAATATAGAACATCAAAAAAGGGAGCGTATATTACACCGAGTATAGGGACACCGTATTCGA	117	7	5	2	2
00128	TAAGGGCTTTGAAAAAGAAGTCCTTCTGGTTCGCCGCGTCTTTACAAACAAAGACGGCAGCACGAGCTTATTGAATCTGGTGTGCAGTGACTTGACGGTGAACTTTGAGCAAGTGGCCACACTCTACAACAAACGGTGGAAAGTGGAAGAGTTTCATAAATCGCTGAAATCCAATGCGTCGTTGGCGAAGTCACCGACTCGTCGGGTCATGACACAGAACAATCATGTCTTCATGTCAATTT	242	7		7	1
0012A	TAAGCTGTGCACCAATGACATTAGTACGTGCTTTGGCATGCCAATCGTGTTGGCCGTAACAGCGCTTCCCTTTCACTGAATAACCATAAAGACGCGGCATATCATGAGCAAAACCGCTTTCATCCACGTAAATTATTGGGGTATCACAGGCTTCATAGCCCTGGAGCTTAGTCTGAAAATCTTTTCGAGCTTGGACGTCGGCTTTGGGGTGATAAAATGTTTTTTTTATAGCTAAAACCTGCCCGCTTT	249	7	3	4	2
00130	TAACCACCGTTTCCACCTTCGACTGCCATATCAACAGCGATATTTTTCATGCCTGGGTCATGCAAGACTTACTACCAAAATCTCCCCAAGGGGCTGTCATCGTAATGGATAATGTCAGCTTCCATAAACGTCAAGACACCCAGGCTGCTATACAGAAAGCCGGCTTTATTCTGGAATATCTTCCTACTTATTCTCCTGATATGAATCCCATTGAGCATAAATGGGCTCAAGCAAAAG	237	7		7	1
00131	TAAGCCAGCCTCGCACCCCTTGTTGATCTGATAATTCCAGTGAACTCATACGGACGAAACGCCCTTGTTTCCTCTCTTCTTCACTCAACGCGACCAGACGATTTTCTTTCAGAGCGGCGATAAAATGCTTCTTTTTTTGCACAATAAAGTCGAAATTCTCTTTGGCAGAAAACCAGCTGTCCA	183	7	2	5	2
00133	TAAAGCACTCATACGATCATTAGATGAATCTATTCGTAACGTTTCTGATATATATGGACCATGATCTAAATCATTAGTAAACAATGTTTCAATAGAGTAGAAACCTGA	108	7	6	1	2
00135	TAATCGATGGAGACTTAGCGCTAAATAATGGAGGATGGCAATGGTCAGCGTCAGTGGGATGTGATTCTGTACCTTATATAAGAA	84	7	5	2	2
00137	TAACAAATTTGATTCTAAAATAGCATCTTTTACAGTAGATCCTAATGCAATATCAACCTGACAAATATATTGAATTTTTGGTAAAGCATAGACAACGGTTACTTTTATGATCTTCATATTTTTATAAATTTTTTTA	136	7	6	1	2
00139	TAATCCGCCATGATGGTTTAGAGATGTTTGAGGGTGTACCGCAACCACTACCTGTTGCTCGATACCATTCC	71	7	2	5	2
0013C	TAATTCTAGTTATACTCAAAAGATAATATATGAATATTCTTGTTCTAACACTATAAAAATAATAGGTACAAATAAATTGGCTGTAATAGCTGAAAAAAAAATTCGAGGAGTAGCAGTTTCGCAAAAAAAA	130	7	5	2	2
00142	TAACTGATGTAAAGATTCGCTATTTGTTACTACTAAAGTATCTATTTTATATGAACGCCATTTTTTTACCTCCATATTAGTATCTAAAATTTTGAAGACTCTTTTATAACATTCAATTAGACAAA	125	7	7		1
00145	TAAAAGAAGAATTTATAGAAAATTATGTCTATCCTGTACTAAAAACTGGAGCTTTATATGAAGGCAGTTATTTGTTAGGAACAGCAATGGCCAGACCTATTATTGCAAAGAAACAAGTAGAACTCGCATTGAATATTGGAGCAAATTCACTATGTCATGGTGCTACTGGGAAAGGAAATGACCAAGTACGTTTTGAAATGGCTTATGCCGCTTTAGCTCCGAA	223	7	7		1
00147	TAAAGTATCAAACGCTACTCGATTCGATACAAGGAAGAAGCCCGAATATAGCCTTTTTACCAATCATCTCTATTCCTGAATTAGAAACATGGATTGAAACATGGTCTTTTTCAGAAACGATCCATTCACGTTCTTATACTCATATCATTAGAAACATT	158	7	5	2	2
0014C	TAACAGACGGTCTTTATTGAGCATTTTGGGTTCTCTTAGCCTAACACTCTCATATTTTCTATAACACGATCGAAAATGCAATAGGCTA	88	7	4	3	2
0014F	TAATAAAATTTATTATCATCATACAGGTTACGTAGGTGGTATAAAACAATCTAGATTTGAAGAAATGATTTCTAGTCATCCAGAAAGAGTTATTGAAATTGCTGTAAAAGGTATGCTTCCAAAAGGTGCTCTAGGACGTTCTAT	144	7	6	1	2
00153	TAAAATATGATGAAAAAAATAGACAAATTGAGCTCTATCCTATTGCTGGAACCAGACCCAGAGGTAGAAAAAAAGACGGAACTTTAGATCTCGATTTAGACAGCAGAATAGAACTTGAAATGAGAACTAATCATAAAGAACTTGCTGAACATTTGATGCTGGTTGACTTAGCAAGAAATGATCTTGCACGTATTTGTGAGCCGGGATCTAGGTATGTTTCCGATCTAGTT	230	7	1	6	2
0015C	TAAAAAATAAATTTCCAGAAATTTCTGGTCCCAATAAAGAAGATATATGTTATGCCACAACTAATCGTCAAATAGCGGTTCGTCAATTATCTAAAATTGCTGATATAATATTTGTAATAGGATCAAATAATTCTTCTAATTCTAATCGTCTTGCAGAATTAGGAAAAGAAACTGGAACATTTACTAAACTTATTAGTTCTTTTCTTGATA	210	7	6	1	2
00161	TAACAACACAAAAAGAACAAGTAAAGCAATGTTTTTTGGCGGATTGTTTTCTTATGATCTTATTTCTAATTTTGAATCGTTGCCGAATGTAAAGAAAAAACAAAAATGCCCGGATTTTTGTTTTTATTTAGCAGAAACATTACTTGTTGTAGATCATCAAAAAAAAACATGTTTGATTCAAAGCAGTTTATTTGGCAAAAATGTAGATGAAAAAAATAGAA	221	7	2	5	2
00162	TAATTGATTGATAATTATTAGATACTAGTGAATCTAAGGCATTTCCTCTTTTGCATATACTAACTAAACATAATTCTTTTGTAATTTTTACCGGAAGATCTTTCATTGAATGAATAGCAATATCTGCTTTATTTTCAAGTAAAGCAAGTTCTAGTT	156	6	4	2	2
0016B	TAAATGAAGTTTATTTAGGACAAGATGGTGATGAACAAATTAGAGGTTTTCCTCTTGCTAGTATTTATTATTTTGGTAGACCAATAAATGAATTGAATTTAGAACAATATGCTTTATTAGTTGGTATGGTCAAAGGTGCCTCTTTATATAGTCCTTGGACTAATCCTAATCTTGCA	176	6	6		1
0016E	TAAAACAACATCCTATAAGAAATAGCAGAGTACAAGGATTTATAGTAGAAATTCTTGGTAAAGAAATGGGTACTAATTTAGCTATAGAGATAGCACTGCGTACACAC	107	6	3	3	2
0016F	TAACCACCGTTTCCACCTTCGACTGCCATATCAACAGCGATATTTTTCATGCCTGGGTCATGCAAGACTTACTACCAAAATCTCCCCAAGGGGCTGTCATCGTAATGGATAATGTCAGCTTCCATAAACGTCAAGACACCCAGGCTGCTATACAGAAAGCCGGCTTTATTCTGGAATATCTTCCTACTTATTCTCCTGATATGAACCCCATTGAGCATAAATGGGCTCAAGCAAAAGCCCTTCG	244	6	3	3	2
00170	TAAATCAGAAAAGTAGTTAGACAGTAGATCAATGAAATTTTTATTACTTTGATCAAGTAGTTTGTTATTACTGCTAATTGTAGGAATTTGAATTAGTGACTTATAAACTTCAATAAAAGAAGGTATTTTTCTTATCATACTAGAA	145	6	6		1
00171	TAAATAGTGAAAGACTATCAGCTCCAACAATAAATTTTTCATTTGCAGAGTAGACATGCAGTATTAGAAGAACATCTACTTGAGATAAAGTTTGAACAAAGTCATGATATAAGTTATATGTCCTAGTGTATCGGTGAGGTTGAAATATCATTA	153	6	2	4	2
00173	TAATATGCGACCTTGGTCGTTTTGGGTATTCACATACCAATTTGAATACACGTCCTAAAAAACCTACATAT	71	6	5	1	2
00175	TAAATCCATTATCGCCTTGCATGGCTGATGGAAAGTGCACAAAACGATATCCGCGACCGTTAGTTGCTGAAACAGTCACAGGGAACGATGGATATCCAGTTTATCGTCGGCGTTCAAAAGAAGATAACGGTCGAACTATCAGA	143	6	6		1
0017C	TAAAATTTATGCACCAGCTTCTATTGGTAACGTTGGAGTAGGATTTGATATTTTAGGTGCAGCAATTATACCTATCAATGGTTCTTTATTAGGCGATTTTGTAACAGTAAAATTATCAAACAAA	124	6	6		1
0017E	TAAAATGATCAGTTTGTCCTTTTATAATTGTTCCTATAGCGATGATCGCATCATATTTTCCAGATTTTGCGATATAACTTGCAATAGTTGGTATTTCATATGTTCCAGGAACATATA	117	6	4	2	2
00183	TAATTTGCATGTAATAGTTGCAATTATACCTCGAGAAAAAGGGCCTAAATGTGGGATAAAAATTACTGGAACACCTAATTTTTCTATAATTTCAGGCGTATGACGATGAGTGAAAATATTATATGGTTGTAAACTTACTTCGCAAAAACTATTA	154	6	4	2	2
00184	TAACAAACAAGAACCATTACAGCAAATTTGGCTAGCAACAATGCAAAATGGGTATCATTTTGATTATAAAAATAATCAATGGATTTGTAATCGTAGTAATAAAAATTTTTGGGAGATATTTGAAAACGCATGTTCTATTCAATCAAATAAAGA	153	6	4	2	2
00187	TAACCCTTCAATCTGATGAAACATAGGTGTATGTGTAATATCGTAATCATTACGATATACTTTTCCGGGGAAAATAAATCTAATTGGAGGTTTTTCTTGTTTCATAATGCGAATTTGCATACTAGAAGTTTGCGTT	136	6	6		1
00189	TAAAAAAAAATCCCGATTCCCGTAGAATGTTAGTTTCTAGTTGGAATGTTGGAGATATAGATAAAATGAGATTACCTCCTTGCCATGTTCTATTTCAATTTTATGTA	107	6	5	1	2
0018D	TAAAAGAACTGGGTGTTCGCGGATTACTTCGTCTAAAATATCCCACACTATTGCTTCTTCTCTTTCCACCATTTTTTTTGCTGC	84	6	5	1	2
0018F	TAATAATTCACGTTACACTAAGTAATTCACCCTCTTTATTTGAGGAAATCATTGTGATAAATAAATCCATTGTTGTTGATATAATGTTATGGGCAACCGAACTTTATCTAATTCTTGATAGCGTTGATTATCCACAAAAGTCGTTCCTAAAAAATGAAAACGGATAATAACGTACAATATACGGCGGATGAGATATCAAAACAGCTGATATTGCTGTGCGAAAGTAGCACGGACCCCTGGGGCATT	246	6		6	1
0019A	TAACATCGAGGAGAATCAGTAATGGGTCAGAAAGTACATCCTAATGGTATGCGATTGGGTATAATAAAAAAATGGAATTCTGTCTGGTTTGCTAACACTAAAGACTTTGCGGATCATTTAGATAGTGACTATAAAGTTCGTCA	143	6	5	1	2
0019B	TAAATCGTGTTTTTGATCCATTGGGATTTCTGGCACCAGTTTTGATTAGTGGAAAAATATTTATTCAGCAATTATGGCAACTGCAGCTTGATTGGGACACTGTTCTTCCAGCTGACATGTCTCAACGCTGGCAAAATTACACTAATGAACTTTGTCAGATTGATCAGCTCAAGGTAGTGCGCAAGGTGAAAGATCATCCGTGCAACAGTTTCGAATTACATGGGTTTTGTGACG	234	6	3	3	2
0019C	TAAATTTTGCCCCTTAGAATCTAAATAACTCAAGGAAGGATGAAATCCAGAATGAAAATTATATTCTGCAATCGCTTCAATATTTTGAGTTTTATTGATATATGGTTGATCCTTAGAAGCATTATTATCGCTAAGAATA	139	6	4	2	2
001AB	TAAGAGAAATAATATTATTTTTTTTATTTGATTTTATAATTTTGAATAAGAGGGGGAATATAAGAAATGGACATATCCCATGGTTGTTCGATCCATACGTTTTGAGGAATATCTATAATATAATTATCTACTAATGAACGACCCATTGGTTTTGCAAAAATAGTTACAAAGCATGCTTTTGGATATAATTTTCTAATAATTTTTGCAGTGCCACCAGTATCTACTAGATCGTCTATTACAATAATTTTTTCTCCATTACCTTCTGCTTTTTT	272	6	4	2	2
001AD	TAATACAGTCGAAAATAAAGGAGCTGTTCCGCCAGGAATATAAATTCCTATAGAATTTAGAGGTAAATAGATTTGCTCACAACGGACTCCAACTTCTGTTTCAACATCTATTTTAGATGGAATTTGAGCTTTATGAAAACATGTAATATTTTTTTGCGCGACAGAAATGGAATCTTTTAGAACCTTA	187	6	2	4	2
001B3	TAAAGAAAAATTTGAATCAGTAGCACTAAATCATTTTGGATCAGGCTGGGTCTGGTTAGTAAATCAAAATGGTGTATTATCTATAGTTTCTACTGTCAATCAAGATAGTCCGTTGATGGGAAAATTGATATCTAATACTTATGGATATCCAATTATTGGGTTAGATATTTGGGAACATGCTTATTA	186	6	4	2	2
001B5	TAATGAGTGCATTACAGCATGGAGGGGTTTTACCAAAATGATTACATGGTTCTAATGTTACATAAGCTGTTCCTCCTTGTGCTTTTTCTCCAGCCATAA	99	6	1	5	2
001B6	TAAATACGGACGATTTGATATATCCATGATACAATTAGATCTACTTTCATCCATTGGCAAGTAGAAACCAAATCTAGATAGACCATTTTTTTTTCCTAAAGCTTGCAATAAAGCCTCTCCTAAAACAATGCCTGTGTCTTCTATTGTATGATGATCGTCAATATCAAGATCTCCCTGTACAGAAATATTCATGCAAATACCACTATGTACTGATAACTGTTCTAACAT	228	6	5	1	2
001B8	TAATAAGAAATCGGCGGAAAGATAAAGAATATGTTCGTCGTTCGACGGAAATATTATTTTCAACCCGTATAATAATATAAGGTACACTTACACTTACCTACAGTCTACACACGACACGCGTACGTCTATATATTATATAGGTACTTGGAATGGCGACGCAGCCACCGCTAATCACTAATTTGCGTTCTAATAATTTGTTACAAAATTGAAAATACCATATACAA	224	6	4	2	2
001BB	TAATTTATCTGGTGTGTTTCTTTTATTTTTAGTCGTGGTGTAATAGTGTCCAGTTCCTGCAGAAGATATCATTTTTATTTTTTCACGAGCTTTTTTAGCCATTGATTCACCTTTATTTTTTCATATTTATTTTTCTTATTACTGTTTCAATTCCTTTTTTATCAATATAACGCATACCATTGGTCGAAACACGTAA	196	6	4	2	2
001BC	TAAATATTATAAATATCGGGAAAAAATTCAACTAAAGAGAGAGCTCTATGAATTCTGAGCGTTCTGAACGCATTACAATTCCTGTTTTACCATTGAGAGATGTAGTTATATATCCTCATATGGTAATTCCATTATTTGTAGGTCGTCAAAAATCAA	156	6	6		1
001BE	TAAAACAAAAATAATAATTTACAACAAACCAGAAGGGGAAATATGTACCAGAAATGATTATAAAAAACGACCTATTGTATTTGATAAATTACCATTGTTGAATATTCATAGATGGATAAGTATTGGAAGATTAGACATCAATACGAGAGGATTGTTGTTATTTACAAATAATGGAAATCTAGCTAACGAACTTATGCATCCAAGCAATAAAATAGAAAGAGAATACTATATTAGGGTTTTTGGAAAAA	248	6	6		1
001BF	TAATAGGTCCCACTGGAAGTGGAAAAACATTATTAGCACAAACTCTAGCAAAATTATTAGATGTACCATTTACTATTACAGATGCAACAACC	92	6	5	1	2
001C7	TAACACTTCTAATGCTCTATAAGTAATATCTGATAGATTACCGATGGGAGTAGGTACAATATAAAGAATACCAATATAAAATTCATTCATTTTTTTTCCATAAAATATTATTATATATGTGATAATA	127	6	3	3	2
001C8	TAAATCAAAATACTATCGAAGATATAATTTTAGCATCAGATGCAATTATGATAGCTAGAGGCGATTTAGGTGTGGAAATTGGAGATTCTGAATTAGCAGGTATTCAAAAAAAA	113	6	5	1	2
001CD	TAAAGCAATATTAGAAGAACGATTAGGATCATATTCAAATCTTTCTACGGTAGCTCCTATATCATCTTTATTTCTTTTGAAATCTACAATACGATATGCTCTTTTATGTCCACCACCAATATGACGAGTTGTAATTCTACCATTATTATTACGTCCTCCGCTTTTACTCTTTTTT	175	6	4	2	2
001D2	TAATAACCAATAAAGTTGACAATTCAGAGCGTTAGCAAGCTCAGGAAGATAGCGTGGTCTTTTTGTTTTACCATTTTCCAATTGTTCAATAGCTTGTTGAGAAGTATCGACTCGTTTGGCTAAATCTTTTTGAGTAAGGCCCAATTCTGTTCGTCTGCTTCGAACTCTATCCGCAATACTCATGAAGTCATCCCTAAAAAGTAACTCT	208	6	1	5	2
001D4	TAAATCAGGAGAGGTTCTAGCTATGGCAAATAGTCCTTCATATAATCCTAATAATACACGACATATCATACAAAAAAATGTTCGTAATAAAGCAATTACAGATCTTTTTGAACCTGGCTCAACAGTAAAACCAATAGTCATTATAGAAG	149	6	3	3	2
001D6	TAAACCAATAGCTGCAGCTATATCTCCTGCATATACTTCTTTTATTTCTTCCCTTTTATTGGCATGCATTTGAACAATTCTACCAAATCTTTCTCTCTGAGACTTTGCAGAA	112	6	6		1
001DA	TAATATGAGTAAATAAACTAGATTCAAATATTTTGAATTCTTCAGTAAGATCTTGTTTGATTTTCTTCAGTTGCATGTCTTCAATTTCTAAAGCTCTTTTATCTTTTTTTACACCATCTCTTGTAAATATTTGTACATCTATCACAGTACCTGATACTCCATTCGGTACTCGTAATGAAGAATCTTTTACATCTGATGCTTTTTCACCAAAAATAGCACGTAATAATTTTTCTTCTGGAGTT	242	6	5	1	2
001DB	TAACTATCGAGAGCGAAGATCGGGCGGGCAATAAGAGTTCTGATCTCAATACAGAGGCACCCTCGTCACTAAAC	74	6	1	5	2
001DC	TAAAGCGCCTTCGGGTGAGTCGAAAAAAAACACTTCAGCATCCCAAAGCTAACGCCAAGGAGCGAGAAAATTTTCAAGCCACTATCCAAGCCTATCAAGCAGCGGATAGACCCATTATTTATATTGACGAAAGTGGCTTCGTGCAGGATAGGCCAAGGCTCTACGGCTATTCACCTAAGGGAAAAAGATGTTATGGCAAAAATGATTGGCTGGCGAAAGGCAGA	224	6	2	4	2
001DD	TAATGCTGTTTTCTGGATATTGAGAACCGGCGCTCCCTGGCGAGATTTACCGCCTGATTATGGTGGTTGGAAAAATACTCATCGCCGATTTTGCCGCTGGCGTGACAAGGGGCTATGGGAGTCTCTGCTCGAAGCGCTGATTGTGGAGCCAGATTTTGAATGGCTGATGATTGATGCCACTCATAGCAAAGTTCACCCTCATGCAGCAGGCGCAAAAGGCGGTAA	225	6		6	1
001E7	TAAAGATAAAGATTGGGTAGTAGTTGGTGGTACAGAAAAAATACTGCTAGAAAGAAATTTTCAGCAAGTCGGAAAAGATTTTCCAGTTTTCTTACATCCAGAAACACATGAAGAGTACGCTTTGGCAAGGAAAGAAAGAAAATCTGGAAAAGGATATACTGGATTTGATACTGATTGTAATTCAGATGTTACTTTAGAAGAAGA	204	6	4	2	2
001EA	TAATCCACTTGGACATGAGTATTTAGTAGAAGAGGATGTATATTTAGCATCATAATCATAAAAATTATTCTTGGTTGTAATATGAATAGCAGGTAGTGCTTTTTGACCTAAAATCGATACTGTGTATTCTTTTCCTACTATAAACTTTTCAATAAGAATATGATTGTCATAA	172	6	6		1
001EC	TAACGGCGCATCGATCAGTCGGAACAATTCACTGCCATAATCGCGCCGCATAACCCGTGCGCCGATCGGCGTCGTCAGGATATCCTTTACCGATTGGCGTAGGTGATCTAAGCCACTAAGCGGCTTA	127	6		6	1
001ED	TAAAATATGATAAATCACATTCCTGTTGTCACCATTGACGGCCCTAGTGGTGTTGGCAAAAGCTCTCTTTCTAAAATAATAGCAAATAAATTGAATTGGTCGTTGTTAGAGTCAGGCCAATTTTATAGATTACTAGCATTTTTGGTA	147	6	5	1	2
001F0	TAAAATAAAATTTTCGGCGTAAAAAATAAAAAATATGACTTTCACATTACAAAAAAGAGATCAATATATATGTTTACTAAAGGTGGTTTAGGTAATTTGATGAAACAAGCACAACAAATGCAAGAAAAAATGGCAAAAATACAAGAGGAAATAGCTCAAATGGAAGTGACAGGAGAAGCTGGCGCTGGATTA	192	6	6		1
001F8	TAAGCAACATAGGGGCTCTAAAACGGCCTCTAAGCGACTTTCTCACACTAGGTAATACAAAAACGACCTCCAAAAATGCCCCAAAAACGGTCTGTTTTTA	100	6	3	3	2
001FA	TAATAGAATTATGTCCTACTGGAGTATTTACTGATAAAACTCATTCTAAAAAATATAATCGTAAATGGGATATGCAATACGCTCCAGGAATATGCCATAATTGCAGTGTCGGCTGTAATATTAGTATTGGAGAACGTTATGGTGAAATACGTCGAATAGAAAATAGATATCATGAAAATATAAATCATTA	190	6	4	2	2
001FE	TAAAGCGTTTTTTATATTAGCTGATAAAGCAAAAAAGTGCTTATCTAAAGCACTTTGATCTTGTGAATAATGTAAAAACCATTTTTTAGCACTGTGCGCATTAGTTATAGTCTCGTCCGTTGTAAATGTTTTAGAAGCGA	140	6	3	3	2
00202	TAAAAAATAATAAACATTAGCATCTTCTATATTCATCCAAAACTGATAAAATTTATAAGGACTAGTTTTATTTGAATCTAACCATACAGTTCCTGATTCTGTTTTACCGAATTTGATTCCATTAGACTGAATTAGAAGAGGTACA	145	6	6		1
0020C	TAATTTTTATACAATATTACATAATATATTGAAAAATATAAAAAAATATAATATATATAAATTATATTTTTACGAAAATTTATCAGAAAAGGTGATAAAAAATGACAAACATCAATCGAATAGGACTTACATGGATTAGTTTTTTGTCATATGCATTTACCGGTGCATTAGTTGTTGTCACAGGGATGATAATGGGGAATATTTCTAATTATTTTCATTTATCTATTTCTCAGATGAGTAACATATTTACTTTTTT	256	6	5	1	2
00211	TAAAAACGGATAAACAATGAAATTTATTGATCAAGCTATAATACATGTAATTGCTGGTAATGGTGGAAATGGTTGCGTTAGTTTTAGAAGAGAAAAATACATTCCTAAAGGAGGTCCAGATGGTGGAAATGGTGGAGATGGTGGAAATATTTGGTTAGAAGCTAATAATAA	171	6	3	3	2
00215	TAACTTATTTTCTGAGATACGTTCCAGTATTGACAGTCACAGATTTCGACCAATTCTTTC	60	6	2	4	2
00219	TAATAAATTACGTGAAGTAAGAAAAATTATTGATGCTAATTTTTCTGATATTCTTTTAGAAGTAGATGGTGGTGTAAAATTAGACAATATTGCAGATATTGCGTGTGCTGGAGCTAATGTTTTTGTTATGGGGTCTGGATT	141	6	3	3	2
00223	TAAACAACCTAAAATCATGGCGCTAAGGTGTGTCGTTTCTTTTTTCCTGAGTAAAACTGCGTTTGCTTTTTTGGGGACGTTCAATCGGCGTTTCTGTGGCATCAATAAGAACCAGCCCATACTTCATATCA	131	6		6	1
00226	TAATCTATAAAACTAACCAGTCATTTGTTTTTCTCTAATTTCTGCTAACGTTTTACAATCAATACATAGATCGGCAGTAGGTCTAGCTTCTAAACGACGAATTCCAATTTCAACACCACAGGAGTTACAGTAGCCAAAATCTTTTTCTTTGA	152	6	5	1	2
00228	TAAAATCAGGCCATAAAACATCAGTAAAATATAGTTCAGAATAAGCTATTTGCCATAATAAAAAATTACTGATTCTTTTTTCTCCTCCTGTTCTAATAACTAAATCTACTGGAAGAAGTTCACTAGTAGATAAATATTGAGAAATAGTATTTTCCTGAATTTTATTTACATCTAAGATTCCTCTCTGCACTCTA	194	6	6		1
0022D	TAAATGTATATAAATAACGTTTTTACGTCCAATATCAACTGCCATTTGACGAATTGCCTCTAAAAATGGAAGTGATTCAATATCACCAACAGTTCCGCCTATTTCTACAAGGATGATATTACTATTTTCGGAGCATAGAATGATTCTTT	149	6	4	2	2
00230	TAATGAATGTAGATTTTGCTGATGTGCGTACTGTAATGTTAGAGATGGGATATGCGATGATGGGAACAGGGATATCTTCTGGAGAAAATCGTGCAGAAGAAGCTTCAGAAATAGCTATATCTAGTCCTTTACTAGAAGATATAGATTTATCTGGCGCACGTGGTGTTTT	169	6	5	1	2
00233	TAATCTAAAATATATTTTAGGATTTATTACTGATTTAGGAAGTAGGACATCACATACATCTATTATGGCAAGATCATTAGAAATTCCTGCAATAGTAGGAACCGGGAACATTACAAAGATAGTAAAAAATAATGATTTTATCATTTTAGATTCTATAAATAATCAAATTCTCATAAATCCATCTCATAAA	190	6	5	1	2
00235	TAAGTGCTGAGTCTAATCATAATATCATCATGCCAGGATATACTCATCTACAACGAGCTCAACCGATTACTTTCTCCTATTGGTGTTTAGCTTATGTTGAAATGTTCAGACGAGATTTCAGT	122	6	6		1
00236	TAAAACTGTACGTAGTGCAACCGGTCTAGGACTAAAAGAAGCCAAAGATTTAGTAGAATCTGCCCCAACA	70	6	5	1	2
0023D	TAACCTGTTAGATGATTATGTTCGTGAGGCGGGTGAAAATCCCTCGATTGGCATTATCTTGTGCAAGGAGCGGGATCATTTCGAAGTGGAATACGCTTTACGAGGTATCGAAAAACCGGTTGGGATCTCCGGATATT	137	6		6	1
0023F	TAATAATGTTAGGCATAACACGACTAATAGAAGATTCAATATCAATAGCAGGATAATGGCCTAAATCAGCATAATAACGCGACAACATAATATGTCCATCTAATACAGAACGAGCAAGATGTGAAACTGGATCTTGTTCATCTTCACCTTCA	152	6	4	2	2
00240	TAATGATTGGTCCTACAGGAGTAGGTAAAACAGAAATAGCAAGACGTTTAGCTAAACTAGCAGATTCTCCATTTA	75	6	4	2	2
00241	TAAATGGATCGGTAGAAGTTGCACCTAGAGCTGGTTTAGCAGATGCTATTTGTGATTTAGTGTCTACAGGAGCAACATTAGAAGCTAATGGTTTACGTGAAGTGCAAGTAGTTTATCATTCTCATGCCTGTCTTATTTGTAAGACTGGAAATA	153	6	4	2	2
00242	TAATATCTGTTCCGCTATCTCCATATTTTGTAAAAAATCCAGTAATATTTTCTGCTGCATGTCCTGTGCCAACTACAAGACCTTGTTTCATCGCTGCAATACTATATTGTACTTTCATTCTTTCTCTAGCCTTTTCATTTCCTCTTACATAATCTGAAATAATGACACCTGA	172	6	4	2	2
00244	TAATGTGTACCAAACATATTTTTGTGTATACTCACGATTCTATTGGACTGGGTGAAGATGGTCCTACACATCAACCAGTAGAACAATTATCTAGTTTGAGAATAACTCCTAATATAGATGTATGGAGACCTAGTGACCAAGTAGAAACAGCTGTTGCTTGGAAAAAAGCTATTGAAAAAACATCAGGACCTACAGCA	197	6	6		1
0024B	TAACTAATCATCCCCATGATTGTCCAGTATGTGAAGAAGGTGGTCATTGTCATTTGCAAGATATGACCGTTATGGTCAAACATAGTATGCGGAATTATAGA	101	6	3	3	2
0024D	TAAACTATTTGATAACATTTGAATAACTACTCCTTGAAGAGCCCTTTCGTTATGACTATAAATCCCTA	68	6	6		1
00251	TAATAAAAAAAGTCAAGGGGGACATTCCTATAGTAGGAATTTGTTTAGGTCATCAAGCAATAGTAGAAGCGTATGGCGGCATTATCGGATATGCAGGTGAAATATTCCATGGCAAAGCATCA	122	6	2	4	2
00255	TAACTAATCATAGTTTGCCTGAAATAGGAGAAGCTTTTAGTGGCAGAGATCATACAACAGTACTGCATGCATGTTGTAAAATCGAACAATTGCGAAAAGAAAATCACGATA	111	6	4	2	2
0025B	TAATGCTTACATAGATCAAACAGATATAGTTTTTTATAAAAATTTTGACATCAGTATTGCTATTTCGACGCCAAGAGGGTTGATTACTCCGGTAATAAGAAATGCTGATACAATGACAATGGCAGAAATTGAAAAAAAAATAAAGGATTTTTCTATGAAAGGATTGCAAAATAAAATCAATATAAAAGAA	190	6	5	1	2
0025C	TAAAGATCAATACAAAAATGAACATGCTGTTATTAGAGTCGGGATAAAGCTGTCAAAGAAATGGCGTCCAATTGTTTTTTCTTCATTAGAAAATTATATTACACCAATAAATATAACTGCATACAAGA	128	6	2	4	2
00261	TAACAATTTTGGTATTTTATATATTGAATTCACATCTTTTAGAGATATAACAGCATCAACTGGTACATTACAAAATAATGCTATTTTTTTTCGCTCGTGAAGAGGTACAGTTTTTTCAGAACGACAAA	128	6	4	2	2
00267	TAACAACCCAGAGTATTCATTGGTTTCAAGAAAGAGGTTTTATTTTAGTGGACATTGAAGTTTTACCGGAAAGTAAAAAGAAGATGTATAACTATCAGCGTGGTTCAAAAA	111	6	5	1	2
00268	TAAGAAAAATAGAAGTCGGACAAACGATACAAATAGGAAACAATATAACTAAAGGATTAGGAGCTGGAGCTAATCCAGAAATTGGACGCACTTCAGCAGAAGAAGATAAAGAACT	115	6	5	1	2
0026A	TAACTATTATAAGCGTCCAGGCAGACCCACGGGTATCAGCCATTATCACTTTTTCTCGGCAGTGTTATACGTATTGAAAACCGGTATCCCTTGGCGTGACGTGCCTACTTTTTATGGCCACTGGCATACGATTTACAAG	139	6	3	3	2
0026C	TAAAATAGCTATATCAATCGATGGAAGAATTGCAATGAGAAACGGTGATAGTAAATGGATTACTTCAAAACAGGCGCGTCAAGATGTTCAAAAATTTCGAGCAAAAAGTTCAGTAATTCTAAGTAGCAGTTCTACTA	137	6	2	4	2
0026D	TAAACAACATAAGGAAGCGGGGCGAAAAACCTGCCCTATCTGATGCGGAAGTGCTCACAATGGAGCTCATTGGGGAGTATCTTGGGCATAATTCAGATAAAGCAATCTGGTTCTA	115	6	2	4	2
0026E	TAAAATGAAAATGGTAGCTTTTGTTTTTTCTCATGCACCACACGGGATTAGTTTAGGTAGAGAAGGTTTGGATGCCATTTTTAGCATTTCATCAA	95	6	5	1	2
0026F	TAACTTTTATATCTGCAATTTCTTCATAGAAAGGATTTCTTTCATAAGCTAAATTTTCTAATATCATCCGATTTGAATCAGCATTCTGCAACAAGGGTCTTTTTTTATCTCTCTTAGTACGTGCTAATTGTTTTTCAATAGTAGTTTCTAAATAAACTACAATACCACGAGATGACAAAAAATTACGAGTTTCTCTAAA	199	6	6		1
00276	TAATGGTTTCAGATAATTCTGTAGGATGATGCCCGTAATCATCTATCAACATACAATTAGCACGTTTATCAAAACCTTGATCAATTGAAAGAAATCCAAGGAATTCAAATCTTCTACAAGTACCTTGAAA	130	5	4	1	2
0027A	TAAACGAAATGAAAATTCCTTATCAATTCACTGATTCTGATGGTCCAATATTAGTTCCAAAAGATAAAGTATATGAAATTCGATTGCGTTTAGCAGAAAATAATTTGCCTAGAGGCGGGAGTATTGGATTTGAATTATTAGATAAAGAAAAATTTGGAATTAGTCAATACAATGAACAAATAAATTATCATCGTGCTTTAGAAGGAGAATTAGCTCGAACTATAAAAAAAA	231	5	3	2	2
0027B	TAAATGATTGTTCTAATCTAATTGATATTGATTCCTGTGATTTTCTTATCCACGTTCTTGGATCATAGTATTTTTTATTAGGTTTATGTTTATTAGTTGTATTTCCTAATTGGTGTTGTAGAAATTCTTTATTTTGTTTATAAAAATCTAAAACACCTTTCCATGCGGCCCATTGTATATCAGTATCAATATTCA	195	5	4	1	2
0027D	TAAACATTTCCCATAAAGGAGAAAGTTCACGTAATCTATGAATAGATTTGTGAACTAACTTTATTGCATGTATAATCTCTTTTTCTGTAGTAAACCTTCCAATAGAAAAACGAATTGAACTATGAGCTAATTCATCTCTAATTCCTAAAGATTTTAGAACATAAGAGGGTTCTAAGCTAGCAGAAGTACAAGCAGAACCGGAAGAAATAGCCAAAT	216	5	3	2	2
0027E	TAAAACATCAATTTCTTATATGCATTTTTTTGATAAATAAGCTTGCGAAAACCATTTTCCATCTTCCCATCGCAACATAACTAATTCTTCACCCCAACAACAACCAGCATCTAATGGGAAAAAGGGTTTAGGTACATGAGTT	142	5	3	2	2
00286	TAAGTGTTGTCGTCGCTTGCCGTACTATTTGTACTGTCTGCGCTCCTCCGCCTTGAATCAAA	62	5	1	4	2
0028A	TAAATCAAAATAAATATTTCTCTAACCCTCGAAATGCAGCAGCGGGCTCATTGCGTCATATTGATCCAAATATTACAGCTGAAAGAAAA	89	5	3	2	2
0028B	TAACACGATCATATTGTTCAAGAAGATATGTAATGGCTTCTGGATACTCTGATACTGAGCATTGAACCTGA	71	5	5		1
0028F	TAAGGCATGACGAATCCCTTGAGCACTGACGCCAAAACGTTGAGCCCGTTCGTATTGGTAATCATCAGGATAAGTAGCGACATCTTGTGCCAGCGCTTCCATATCTATTTTGGTAGCCGGTTTATTGTGCGTGGTGCAAGGCGTTATGCGGCGATTCCAGCGCATAAGACTCGCCATCCCTACGCCAAAACGAGACGCTGTTTTCGCATACGTCAGTTTTTCTTTTTCTTT	231	5		5	1
00294	TAACTTTCACTGCTTATCTGAAATGTGAGCAGACAGAAGGGGAGCATTGTGCGATACGAAGCGATAAAGATCCCAGTATTACCGTGCCTGTTGAGAGTTCTCTGACATTA	110	5	1	4	2
00299	TAAAATAGCGTCTTCCATATTCATTTTTTCTTGACTAAATGGTACATAAGCATCTTTATAGATTTTTTCAAATGTAGGAGACATTATGAAAAAA	94	5	3	2	2
0029F	TAAATTTTGAGAACTGCTGTTTAGAAAACTGATAGAAGAGCGATCTATAAGAAGATTGATGATGCTCTTGGATCCGACAGTCACCGCTAGTCTTCTCCTCCCCTTTACCAAATGTATTTTCTTTCTAATGGAGCGCAAATTTACACACATACAGCGTGCTTATGAGGCTGACAAGACCTA	180	5	2	3	2
002A0	TAATACATTTTTTATTTGATCAATTTCATGTCCTTCTGGTGTACTCCAATTACGCCATTGTTTTCCGTATATTGGACCAACATCTCCGGATTCATTTGCCCAATTATTCCAAATTGATATTTTATTTTCATTTAGATAAGCAATGTTTGTGTCT	154	5	3	2	2
002A9	TAAAGAGTGACCGAGTTCCTTTTCAGCACCAAATGATATTCCGCTTCCTCTAACGGCCTTCGCTCTGCTCAGGCCATTCTTGCGGCGAGCGTTGCGGATCTAAAAAATCC	110	5		5	1
002AA	TAACAAAAATATCTGTAAAATATAAAGAGTAAATATGAATCACATAAAAAATAATCCAGTTATTATAATAGATGGTAGTTTATACCTATATGCATCTTATTATGCATTTTGCAATTTAGAAAATACTTCAGGAAAACCCTGTGGGGCAATATATGGAAT	159	5	4	1	2
002AD	TAATCCGCAGACTTTATTATCACCAAAAATTATAGAACGAACGGCTGTCTCTAAATTAGTTTGAGACATCAAATGAGAACCAA	83	5	4	1	2
002B3	TAAGGATGGCAAAAATAATATCTTGTTTACGCATACGCGCTAAATTTTCCAACCCCATTTTTTCACCAAGAGTAA	75	5	5		1
002B5	TAAAAGATATTATTGCCATTCTAGGTATGGATGAATTAGCAGAAAAAGATAAATTATTAGTATCTCGAGCACGTAAAATACAGCGATTTTTATCTCAACCATTTTTTGTTGCAGAAGTTTTTACTGGTTTTCCAGGAAAATACGTTT	147	5	4	1	2
002B6	TAAGACCAGCATCAACTAAAACCATATCTTTTTCTATAGAGACGATGGTGCCGCGAATAATAGAACCTGGACGA	74	5	4	1	2
002B9	TAATGTGCATCCGATAATTTCTATAGGATGATTCTGTATTTTTTGATTTATCCTATAAAGTTCAATATTATTTACTGATTGATGAGATAATGCGCAACCAAGATCACTTTTGTTGAGAGTAGATATAAATT	131	5	2	3	2
002BA	TAACTTTACGTCCAGAAGGCACTGTGGGCTGTGTGAGGGCTATAATACAAAATAATTTACTACAAAAAAGTAATAAATTTTGGTATTTAGGTCCTATGTTTCGATATGAAAGACCGCAGAAGGGAAGATATCGTCAATTCTATCAGTTAGGTGCAGAAGTATTCGGATTAGATACGGAAGATATAGATTTAGAAATTATTA	201	5	1	4	2
002BB	TAATACGTGAAATCCATAACTGACGAAATTGTCGTTTTCGTTGTCTTCTATCACGATAAGCATATTGACCAGC	73	5	4	1	2
002BD	TAACTTTAGTAGAGCTTGTTGTACTCCCTCTCCAGATACGTCTCTAGTGATAGATGGATTATCAGATTTTCTTGCTATTTTATCTATTTCATCTATGTATACAATTCCTAATTCTGCTTTTTTTACATTATATTTACATTTTTGTAGTAACTTTTGTATTACATTTTCAACATCTTCTCCTACATATCCAGCTTCA	196	5	4	1	2
002BF	TAAAGAACGTTTGTTTACAACAATCTCTCCATTACCAGATCTAAGAAATACTCTAGCAGAAGAGCTTTTACGACGACCGGTACCATAGTTTTGAGTTTGAATCATTTATTTTATATACCTTTCTGTCAAATA	132	5	4	1	2
002C5	TAATAATACGCTAAAAACAGAAATTTTCCCGGCAGTGCTAAAAAAAGATAATACTGATGTTGGAGAGCCTTGATAAATATCAGGAGTCCATAAATGAAATGGTACAATTGACAGC	115	5	4	1	2
002CA	TAATAGAAAATCATTTATCATTTGAATATCAATCGGGAGAAGGTGCTTTCTACGGACCCAAGATTGAATTTATTTTACAAGATTCTTTAGATCGAAATTGGCAATGTGGGACAATTCAACTTGATTTTTATTTACCATTG	140	5	2	3	2
002CF	TAAAAGATAAAATATCTTCGTTGTCCCAGTTTTTATAAAAAGAAGAAACTGGTGCGTCTGCAAATAAGTGTTTTGGTAATAAGTTATGATATATTTGATGGAATGAATTTTTTGGGTCCGATACTGACATTGCAGAAAAAGTATCACCATGATAACCATTACGAATAGTCAAAAATAATTTTCTCTTTTGCCCTAATGCTTGCCAATACTGTA	213	5	3	2	2
002D8	TAAAGCCAAAAAACCAGCCGGTTGAGCTTTTCCCCCGTTCTGCCAAGCCTTGAAAAACGCGATGACGCTTGATACGCATATTATCGCAAACAGCAAGCGGCGTGGAGTCCACAATACAGACCCCTGAACATTCT	134	5	3	2	2
002DD	TAATATCAAGAAAAGAACTAATAAGTTTAGTAAATGTTCCAGTTTCTTTTCCTAATTCTGCAAGACGATTAGAATTAGAAGAATTATTTGATCCTATTACAAATATTATATCAGCAATTTTAGATAATTGACGAACCGCTATTTGACGATTAGTTGTGGCATAACATATATCTTCTTTATTGGGACCAGAAATTTCTGGAAATTTA	206	5	5		1
002E1	TAAGAAAAGAAAAGAACGATATTACCTACCAATTTATTGCATTGCGCTTACCATATGGTATTCAATATGATGAAAAAGACTGTCAGGATGCAATTCGTTTTATACAACCAGACCAAA	117	5	5		1
002E6	TAAATTTAGAACAAGCTAATATTACAGGAGACAGCAATCATATAAAAATAATTGCTATAGGAAATATTTTCAAAAATGTCAGCCAAGTAAAAAGACAACAAATAATTTATGCTCC	115	5	2	3	2
002E8	TAATTCATCAATAACTCTTTGTTCTCTCAAACGAAAACCACTTTCACCCTCTACATCAAAAACCCAACTTATATCAGCACCAGTACGTTTTTCAATTTCTTGATCGGAGTCAAAAAATTCCATA	124	5	3	2	2
002EE	TAAATCTAACATGCATCCTGCGTGTTTCGGCAAACTAGGTCCGGGCGACAGCA	53	5	4	1	2
002F1	TAAATTCGGAGCTAAAGCGGCATAAGCCATTTCAAAACGTACTTGGTCATTTCCTTTCCCAGTAGCACCATGACATAGTGAATTTGCTCCAATATTCAATGCGAGTTCTACTTGTTTCTTTGCAATAATAGGTCTGGCCATTGCTGTTCCTAACAAATAACTGCCTTCATATAAAGCTCCAGTTTTTAGTACAGGATAGACATAATTTTCTATAAATTCTT	221	5	4	1	2
002F2	TAACTGGTGATCCTTGGGATGGTAGGACTTTAGAATGGTCGACCTCTTCACCTGCTCCACTATACAATTTTGCTATTATTCCTAAGGTTGAAGATAGAGACGATTTTTGGCGAAATAAAGAAGGACAATATTACAATAAA	140	5	2	3	2
002F3	TAAACCATCTCGAACATCTGGTAAGGCGCGGCCGACTATCACGGACATAGAATAGTCTAAGTAAGAGCTTTTTAGCTCTTCTTCAATATTGACCTGTATGATTTCTCGTGAAGGGTCTTTCATAAAAAGTTTATCTCTTTTATTGAAAAAATCAAA	156	5	3	2	2
002F4	TAAATGTATTTGAAGGAGAACGAGTAGATCGAGGAGATGTCATATCTGATGGGCCGGAATCACCACATGATATC	74	5	2	3	2
002F5	TAACTAAGTGATCAAAAGGGATGTCCAATGCGTCAGAAAGTGCTTTCCAACGTGGATCTGAAGTGAGTCCCCCTGCGTCAAGTAACGCTTTAGCATCGACCCAAATGGCA	110	5	2	3	2
002F9	TAAATTTATTAGTGTATAATTATATTATAAACAATATACATGGAGAAGTAAATATGGTAGTAGATCCCTACCAAAAAAGAGAAGCTAAAAGATACAAAAATCCAATTCCAAGTCGAGAATATATCTCATCATGTCTGAGAACATCTCAAGATCTGATAAGTCAAAAAAATTTAGAAAAAAAATTCGGTA	189	5	5		1
002FA	TAATTCAGTAATAGAGTATTTGGCTACTAACGCTCGAAGAATAGTTTGTCTGGCTTCTTTCTCATCTAATGAAATCAAGCGTTGTGCATTTCTCTTTTTTTTATAAAAAGCATGCTTAGAAATTCTATATTGAAAAATA	139	5	5		1
002FD	TAAGATGATCTATTTCGTGCTGTATGCAAATAGACAATATTGATTTTGCTTCTATTTCTATTTTTTCTCCATCAAGATTTACTGCTTGCACCTGTATATAATTAGATCTTGGAATAGAAGCTTGATACTCTGGAATTGATAAACATCCCTCTTCAATACTAATATCACCTTCTTTTTTGATAATTTTAGGA	191	5	4	1	2
00301	TAATAATTTCAATTCGTGCAGACAAAATATCTAAATGTTGAAATTGCATTGGAATGCATGTACTATATTGATTAGATTTTTCACCTTTATAGTTATAAACTTCGGCCGTAGATTTGATACGCCCATCAAAAGTAAAAATA	140	5	1	4	2
00303	TAATGGCTGCTACACAAGTAAAAAATGTGAAGCAGCTTATCTCTTTTACTTGAGACGTTCTTTGATACGAGCTGCTTTACCTGTGCGCTCGCGTAGATAATATAATTTGGCTTTACGAACATCTCCGCGT	130	5		5	1
00304	TAAATAGTCCGATATCACCAGTCCTTTGAGTATGTGTTCCACCACAAAGCTCGATAGAAAAATTATTTATGAATACGACTCGTACAATAGAACCGTACTGATCATCAAAAAGAGCCATTGCTTTTTTCTTTTTAGCTTCTTCTAAA	146	5	5		1
00305	TAAAGGCGTTGCAACAGCAAACCTTCCGTAACTGGAGCGGGGCTATTGTAGAAATTGATATTCGTAAGTACTTCAACACCATTCCTCATCCGGAATTGATGGAATTACTGCGGAGAAAGATTGCAGTTCGACGTTTCCTGAGACTGATTGAGGTGCTGATAACTGCGCCAATAATAGCAGGTAAACAATTATCCAGAAACGAGCAAGGTTGTCCGCAAGGGTCAATTCTGTCGCCTATTCTTGCCAA	247	5		5	1
00309	TAAATTCTATATCCCTTTTTATAACACTGAATCCTCCTGCGTCATCGCATTACACAATTCAACATCCAGACGTGCCTGAAAACAAAAACATACAACAATGATTCTCATGCAATTGGAATGACAAAATCAAATATACACAATGAAAA	146	5	2	3	2
0030E	TAAATGGTGAGGGATTGCAACATGAAGATGGACATAGTCATATACAATCCTTGACTATTCCTAATTGCATATCTTATGATCCTGCTTTTGCTTATGAAGTTGCTGTAATTATTCAAGATGGA	122	5	3	2	2
00318	TAAATCAGCAATATCAGGTAGATCTTCAAATCGGAGGAGCTGATCAATGGGGTAATATCTCCTCAGGAATGCA	73	5	5		1
00319	TAATTGATTTTTGACGACCTACAAATAATGGAATTACCATATGAGGATATATAACTACATCTCTCAATGGTAAAACAGGAATTGTAATGCGTTCAGAACGCTCAGAATTCATAGAGCTCTCTCTTTAGTTGAATTTTTTCCCGATATTTATAATA	155	5	5		1
0031A	TAATTTTGTCCAACTTGAGTATTTAGCTAGAATACTGTTTTCTTGCGTTTGAACCAAGAGCGCAAACTGAACTGGACGTTTTTCAAGGAGTTCACTTGATGGTGCGGATGAACATTCTGCCGGCCACTCTGTTTTCGGCTGCTGGAGAAAGGTTGGACCGTACCACCAGAGATTTGAGTGTAATAGGTCTTGTACCTTTACACCTCGGGACGTTAGATCTGCAGGATTGAACTTCGTCCTTACATGTTGCCAAGTCATTT	260	5	5		1
0031B	TAACCTCGCGACACTCTGGTTTATCTAAAAGAGTGCAAATTGATAATGATTTTGGATTTCTAAGTTTCAAAATATCTAAAACTTTACTTAGAGTTTTTCCTGAATCAATAATATCTTCTACGA	123	5	5		1
0031E	TAATGTAAAAAAATTATTCGTATAGGAACTTGTGGTGCTGTACGAGATGATATAAAGTTACGTGATATAGTAATCAGTATGGGAGCTTCTACTGATTCTAAAGTAAATAGAATAAGA	117	5	5		1
00325	TAATCCAGGCATGAAAAATATCGCTATCGATATTGCACTGGAAAGCACAGACGGTTATCAGCGCTCCCTCCAGTAAAGCGCCGATAATA	89	5	1	4	2
00326	TAATTCTTTCATCTATTGGTGTAAGTTATGCTCATGGTGCAAATGATGGGCAAAAAGGCATTGGA	65	5	4	1	2
0032C	TAAAAAATCCATGTTATCTTTACCTTCAACAAATTTTACTGAAAGTTCTGGAACGGTAATAAACTTTGAAGGAAGAGCACAGCGTTTTTTTCAAGTTTATGATCCTAATTTTTATGATAAAAGTCATTGTCTATGTGATAGTTGGAAATGGTTGCATACTATCAAATCAAAAA	173	5	4	1	2
0032D	TAAGGCGCGTTTTCCCGTAGGAATGTCCGCCAAGCTGGTTTTCAGGCCATTCTGATCGAGTAAAACAAATTCCGGCACATTATCACCGGC	90	5	1	4	2
00330	TAATATCTTTATTTAGCGACAATATAAATATCTCACATTATCTACATGTTCACTATGTAAAAAATTCAACAGAACTAGCTATATTATGTATGGCAATTGTTGGTTCAGGATTAGGTTTTTTAT	123	5	3	2	2
00334	TAAAGAGGTTAGTTCATTTCTTTGGTTACTGAGCGAGTCCGTATTGTCATTTATCGCATGCAAACATTGC	70	5	1	4	2
00335	TAACAATATGCTTGATAAAAAAGAAATTTACTGGAAAAGACATAATAATATTGAAGAAATAATTTCAGAAATAGATATTCTTTATATGACTCGTATTCAAAAAGAACGTCTCGATTCTACTGAATATGCCAATGCAAAATCAAAATTTGTATTGCGTGCTGCTA	164	5	4	1	2
0033E	TAATTCATATAATTTTTTAGCACTAGAGTTCAAATAATCTGAATCTATATTTTTTATTTTGATATCAGAAGGCCGAATAGCCTCATGAGCCTCTTGAGAATGTTTTTCATTGGAATATACATTTGGTTCTTTAGGTAAGTAATTAGAGCCATAATTACTTTTTATATATTTTCGTA	176	5	4	1	2
0033F	TAATCAGGATTTGTTGCCTAAGGTACCTCGTAATGCCGTTATTGTGATGGATAATGTTAGTTTTCACAAACGTCAGGATATACAACATTCAATAAAAAAATGCCGGATTTACCCTCGAATATCTTCCTGTTTATTCCCCTGATCTCAATCCCATTGAGCATAAATGGGCTCAAGCTAAAGCACGTCGGAGGAAATACAGATGTGATGTCGATACTCTGTTTTCTACCTCCTTATTTTGAATCAATTTATATA	252	5		5	1
00340	TAAGCAACTCGTTTACTGTCATAAATCCAGCGTTTTATCTGCTCACAGGCTGTCTGCATATTTCCCTGCGTTCAATTCTCGCCATCTCGCCAGAAGAATGTGGAACGGGTACAGCTTACCCACCAGGGCGTTTTCATGAACGTTTTTTGTACGGTATTTTGTACAGTAAAAGTGGCGTA	179	5	1	4	2
00345	TAAAGGTAATGTCCAGGTAACAGGAGGGAATGTCACTGTAAGCGGGGATGTTGTTGCTGGTTTGCTTTCCGTCCCTGTTTCATTACAGACACACGTTCATATAAGCTCTGTTCCTGGTGTGGTAACAACGCCCTCACTACCAACGCCAGCAACGCTTGCGACTGCGGCCGCTGGGGCTGAAAGACTGATGACTGAAGTGGCTAAGGCTGCTAAAAAGGAAATTGAAAAAAATTGAATCTCCTATAAAGATT	251	5		5	1
00347	TAAAGATGTCTTATTACTTGATGTTACTCCTCTATCCCTAGGAATTGAAACTATGGGTGGAATAATGACATCACTGATAAATAAAAATACCACTATCCCTACTAAACATAGTCAAATATTTTCAACAGCAGAAGACAATCAATCAGCAGTTACTATACACGTGCTTCAGGGTGAACGTAAAAGATCTTCAGATAATAAATCATTGGGACAA	211	5	2	3	2
00348	TAATGATGAAACAATAGCTGTACACATTGCTGCACCTGCACTTGGTCCATCTTTTGGTGTTGCACCTTCAGGAACATGAACATGAATGTCATGTTTTTCATGAAAATCTTT	111	5	4	1	2
0034A	TAACAGAAGAAATGACTTGGCAACATGTAAGGACGAAGTTCAATCCTGCAGATCTAACGTCCCGAGGTGTAAAGGTACAAGACCTATTACACTCAAATCTCTGGTGGTACGGTCCAACCTTTCTCCAGCAGCCGAAAACAGAGTGGCCGGCAGAATGTTCATCCGCACCATCAAGTGAACTCCTTGAAAAACGTCCAGTTCAGTTTGCGCTCTTGGTTCAAACGCAAGAAAACAGTATTCTAGCTAAATACTCAAGTTGG	260	5	5		1
0034D	TAAAACATAGAGGAGTAATTTGTGAAAAATGTGGTGTTGAAGTAACACAAAGCAAAGTTAGACGTGAACGAATGGGTCATATAGAACTTTCTTCACCTACAGCTCATATTTGGTTC	116	5	4	1	2
00352	TAATCGATGTAAAATAGAATCTCGAGATTGGCCAAAAGCTAATGCTTGTGTTTGAGCAAAAAAATTAGATA	71	5	5		1
0035E	TAAAATTGCATCAGGTGAAAAATATAATAGAGATGCTGATAAAAATCCTGTTCCGCAACCAATATCTAAAACTTTTCCAGTTATTCTGTTAGAAAAAGTAGAGGCGAGTAATTTACTACCTGAATCTATCTTTTTGTGACCAAAAACTCCTGGTAGTGATTTTATAA	167	5	4	1	2
00360	TAAATTTGAAAGCGTTAGCGGTAAAAGTTTATGGAAAAGATGAAACCCTTCTCACATTACATAAATCTGGTATTGGTTCTATTACTGCCGCAGATATCATACATGATGGAGATGTTGAAATCATCAAGCCACAACATGTAATCTGTCA	148	5	4	1	2
00361	TAATACTTGTTATCGTATTTTAGGACTGAAATCTACTGTTTTTTTTGCTGATCAAATTATGTACACCGGATTCGCTTATGCAGCAAGATCTGGAGCTTCGGTAGGTATTGATGATATGGTAATACCAGAAAAAAAGGCAAATATCATCAATGAGGCTGAAATTGAAGTTGCTGAAATACAAGAACAATTCCAATCTGGATTAGTGACTGCGGGTGAAAGATATAATAAAGTTATTGATATTTGGGCGG	248	5	5		1
00364	TAACGCAGCTATAACAATATAATAAGCATTCACTTCAAAGTGATCCCGCAATTTATCACGACTATCTGAACGACCAAAGCCATCTGTGCCTAATACATGATATTCTTGAGAGGGAATGTAGTGTCGAATTTGCTCAGCGAATAATTTCATATAATCAGTAGCCGCAACGGTGGGGTTTTTATTCATAATTT	191	5	2	3	2
0036D	TAATAATTCCTTCCATAGAAACTATTCGAAACATTCTAGGTTTTGGATTTCCAACTTGAGGTAAAGGAGTAACAGTACCTACTTCAATAAAACCAAATCCTAGTTTGGATAAAGCATCTATATATTCTCCGTTTTTATCTATTCCTGCTGCCGTTCCTAGTTTGTTATCGAAGA	174	5	4	1	2
0036E	TAATGGAAAGCACTACCTTTTCTGCTAATTCAAAACATGGTGTAAGCAAAATTACTTGAGAAGAAACACCATGTTCAGCTTGTGATAATAAATCAGCGGCAATAAAATCTGGATTAGCAGTGTTGTCAGCAATGA	135	5	3	2	2
0037F	TAAAGACGCTCCAACAGATACAATTTGTTGAGTAGATACATCCATATAATTTACTTGATTACGGTTGAATAAACTAGATTCGCCTTTATGTCGGCAAGTTACTAAATCGTCAGTAAAAAAACCAGTTTTATCGATATTAGTATTAGCTTGTGCAATAATATAATTGCCTTCTTCTATAGCTGATAGATAATGAATTTCCTCACTAACTAAACCGTTACAAACTTTTCGATAAGGTGTTTCTAAAAATCCATAAGAATTTGTTTGAGCGT	269	5	5		1
00381	TAATAGAAAAAGCCATGTTACCTACTCCTTGGGGAAATTTTCTTATCTTTGGTTTTGAAGAAAAGAAAAATGGGAAAAATCATGTTGCTCTTGTATATGGTGATATAAAAACAAACACTCCTACTCTTTCTAGAGTACATTCAGAATGTCTAACAGGAGATGCTTTTTTTAGTTTACGTTGTGATTGCGGTAGTCAACTAGAAATGTCTATGAAAAGAATTTCTCAGGAAGGCAGTGGTGTA	242	5	4	1	2
00388	TAAAAAATGGCATCCCTATTTCTACACCGGTATTTGATGGTGCACAAGAAAATGAAATAAAACAAATGTTGAAATTTGCAGGTTTACCTACTTCAGGTCAAATTATACTTTTTGATGGAAGAACAGGCGAAAAATTTGAAAGACCTGTTACTGTTGGTTATATGTATAT	169	5	4	1	2
00393	TAACTAACACCCCTCTTCAAGGAGCAAATATTAGCGTGGTTAGTGGTAATTTTATTATTTCACAACCATTAGGAGTTGATGATGGCGTAGACTACTGTCATAGTGGCAGAGTTAGGAGGATTGATAAAAATGCAA	135	5	4	1	2
00399	TAACTCAGGTAAAATCATCGCATATTTTTCTAATGTATTTTGAGAAGCTTTACGACTAGCAATACTTTGTCTATTTTTTTGTAAAAAAGAAATGTAATTATTAGTTACTCTATCCCACTCAACAGGTAATTTTTTATTTATTCGCCGCAAATATTCAGTCGATAAATCAGGATATTTGGATTGATATAAAGAAAATTTTTCGTTCCATTTCTTTTCAAGTTTAGATCCTTCTTCTATAAAATTCCATTTTTTATAAATTTCTTTAGGTATCTGAAAAGGAGGATAATT	288	5		5	1
0039A	TAATTCAAAATAGCGATACTCCTGTTCCAGTTTTTTCATTTATGGGAAACGTTTCACATCATCCTAAACAGATACCATGTTACCTCACACATACTAATGAAAAAACACATGAAATAATACGTAAAAATTTAGATAAAAGTCCAATATATA	150	5	5		1
0039C	TAAAGCGGGCAGGTTTTAGCTATAAAAAAACATTTTATCACCCCAAAGCCGACGTCCAAGCTCGAAAAGATTTTCAGACTAAGCTCCAGGGCTATGAAGCCTGTGATACCCCAATAATTTACGTGGATGAAAGCGGTTTTGCTCATGATATGCCGCGTCTTTATGGTTATTCAGTGAAAGGGAAGCGCTGTTACGGCCAACACGATTGGCATGCCAAAGCACGTACTAATGTCATTGGTGCACAGCTT	248	5	1	4	2
0039D	TAAAATAATACCAGGAAGCAATAATCCTACTAATGCAAGAGATTCTAAAAAAGAAACGATGCCAACTACCAAGAGAGAGTATACTAATGACTGTGTTATAAAAGAT	106	5	5		1
003A3	TAAAATATGGTGTAGAAGATGAGGTGATAATTTTACGTGTCTCTGGCTGTCCTAATGGTTGTGGACGATCCTTATTAGCTGAAATT	86	5	1	4	2
003AF	TAAATTCTGAGTGGCGTTGAGGTAACGGCTATCTGCGTCTCCCGTGGTAA	50	5		5	1
003B3	TAATTTATGAGATGGATTTATGAGAATTTGATTATTTATAGAATCTAAAATGATAAAATCATTATTTTTTACTATCTTTGTAATGTTCCCGGTTCCTACTATTGCAGGAATTTCTAATGATCTTGCCATAATAGATGTATGTGATGTCCTACTTCCTAAATCAGTAATAAATCCTAAAATATATTTTAGA	190	5	2	3	2
003B6	TAATTACATCGGGGAGAATGGGTAAGCCTTATCTACAAGGCACCCCATCGTGCGAAATGCTACGCCAATTTTATGCAAAATGCAAAAACTGGCGTCTCTCCATCACCGATCAAAACACTCGCACTTTAGTTTTCTA	136	5	1	4	2
003B9	TAATCATCTTTGTGGATCAAGACCCGCAACATTATTACTGGAAACAGCAGAA	52	5		5	1
003BA	TAATTCTTGTTGGATTAGATGTAATAGGTGATAAACTAACAGAAATAAATGTTACGAGTCCAACATGTATTTGTGAAATAGAATCGCAAAAAAATATTTCTATTACCGGAATGTTGTTAGATTATATTGAAAAAAAAGTATGTTTGTAGAGATCATAAAATGATAGTAATTGCATTTGATTTTGGTATAAAAAAAATTGGAGTAGCTGTAGGAGAAAATATAACTAAAAAAGGAAGA	237	5	2	3	2
003BB	TAAGGTTCTAACAATGCATGAGAGTCAAAAAAAGAGATGGTATGTATTACAAGCTTTTTCTGGATTCGAAAGTCGTGTAGCACAATCAATACGGGAACATGTGAAA	106	5	5		1
003BD	TAAATAAGCCGGCAACGTGGATGTTAGAGTTTTTCCTTCACCTGTACGCATTTCTGCAATACATTGTTTGTTCAAAGCAATTCCGCCAAGAATTTGAACATCAAAATGACGCATGCTAAAAACACGTTTACTCGCTTCTCTGACTAAAGCAAACGCTTCTGGTAATATATCATCTAAAGTTTCACCATTT	190	5	4	1	2
003C0	TAATAATTCTATCGATATTCATGGAGGCGGCTCTGATCTTCTTTTCCCTCATCATGAAAATGAAAGATCTCAATCTATAT	80	5	1	4	2
003C6	TAAAACTGCATATCTACGAGCATCTTACATTACTCCTGTACCAGGTGGCGTTGGTCCTATGACAGTTGCAACATTATTACAAAATACATTAGAAGCTTGTGAAAATCATGATGATA	116	5	4	1	2
003C7	TAAACGGCACGTTATGGCAGTCGGCGGACCGGTTGTTCGAACGCTCTGCGACGCTCGCCATAACGTGCC	69	5	4	1	2
003CA	TAATAGACCAAATCTCTTTTTTTTCATTCATTTGCAATCCTTTTTTTCTCTCTTTTGCAATAAGATATTCTCGTCTTTTTTCAAGGATTTTATCATGTATATTCATCAATAAATCTAAAAACATGTTTTGAGTTTCTTTTTGAATTATCATGTGATCCCATCGTGCTAAAA	171	5	5		1
003CD	TAAAGTATCGGCATTATAAAATAATGCTTTATCTAATAAAGCCTGACAAGCAGTCACCCCTGTAATAATTTTCTTTACTATTTCTGTTCCTTCGATTTGCAAACCATTCGGAACTGTATCTTGATACTGATTAGATAATAATTTTTTATTGATAATATCTTCTAAAAGAAAATTGTTCATGAATTTTTCAGTCCATTTTTATGAA	205	5	2	3	2
003D2	TAAATATATTTTGACCAATCCCACCATATAAATGCTTAGCAACAACAATAGCAAAAAATAAACCAATACTTGTCATCCACCAAGGAAGCAAAGGGGGGATACTAACTCCAAATAATACTGAA	122	5	2	3	2
003D3	TAATATCATACTTATATGATAAAATTTCATTTCCTATAGCATGAAGTAAGTGAGTTTTTCCTAATCCTGTTGCACCATATAAGAATAATGGATTATAAGAATTTCCAGGATTTCTTGCAGCTTGAAATGCTGCTGAACGTGCAAGCTGATTAGATTTTCCTTCTACAAAGTTTTGAAAATTATATCTTTTA	191	5	4	1	2
003D4	TAATATCGCTTTTCTTTCTCACTCCGTAAAATAACAACACTTCCGTAGCGCTAAATAAGTCTAATAGGCGGGTGAGAGCACGTCTGCCTCATGCCAAAGGCGGATAAATTCTTGCTGATACTGCATCGCTATTGTAGGCATATTCCATAGCACTATTACGTTTTCAGCATTGCGTTTATTCGCGCTGGATGAATAATTGTAGGAGCCGGTCTGTAGTGTTTGGCCGTCAATAAC	234	5		5	1
003DC	TAAACATATCGATAACAGATAATGTATCTCCTCCTCCTGCTATAGAAAATGCATTGCTATTTGCAATTGTCTTTGCAATCATCTCAGTACCTTTTCTAAAGTTTGGAAATTCAAATACCCCAACTGGTCCGTTCCACATAATTGTTTGAGATTGTGTAATAATACTAATAA	171	5	5		1
003DF	TAATACATTATTAGCTGCGCTGAAAGCGTCAAGTAAGGAAATACCTCGGCTGAGTAC	57	5	4	1	2
003E1	TAATTACTCCATTAGATGTTTTAGAAGCTATAGCAGGAGAATTTCCAGATGCTGATGAAACACCAGATATTATACAAGAAAATAACAGCTGGCTAGTAAAAGGCGAAACAGATTTACATTCATTACAGCAATTA	134	5	4	1	2
003E2	TAATTCATGAAGCCATTTATTAGAAATGGACCATATTCTATTTGCAATTTTTTTTTGTCTTTTCCCTAAATAAAGCTCACCAAAAAAAAACCAAATAGAAATACCAATAAAAGGAATAATATAAATTGTTAGTAACCAAGACATGGAATAAGGTATATTGCGGCGTTTAA	170	5	3	2	2
003E5	TAATGGCATCTTGATACCTGGAGGTTTTGGCGATCGAGGAATTGTAGGAAAATTATTATCAATACAATATGCACGAGAAAATCACATTCCATATTTTGGTATTTGTTTAGGCATGCAAATAGCAATTATAGAATTTGCACAAAATGTAGTTGGAA	155	5	3	2	2
003E9	TAAAAAATATTATTTCTAGTACTAATCAGATTCAATGGTTATTCGGATGCAGGATTTTTGTTGTCGGTAAAAGATTGTTTCGTATAGCAAAAAAATTAGGATGGAATGATGTAATAGTTTCAAAATATGCTAATAATGATTCTTTTATCAAAAAAATAAAAGAAACGAA	169	5	2	3	2
003EF	TAAACGGTACGTCATAGCGAGCGTCGCGCGGCGTTCGAACAACTGGTTCGCCAACCGCTATGACGTGCC	69	5	3	2	2
003F2	TAAACGACCTCCCCCATGAATCACTGACACATGACGCTTATAAAATTTCTGATAATCAACTAAAGCTTCAAATAAACGCTTCATAGCATCGTCACTTTCTAAAAGTACTCCGCCTAA	117	5	4	1	2
003FA	TAAGTACGATGAAAATAGAATCGAAAGAAAAATATCAGCTGAGTGATGAAGAGTTACAACTTTTTGAGGCGTCGATTAGCGGCACCAAAAAATTGAAACAAGACAAGATAATGCATCACTATCATCAAAAAAATCATCAAAGAGTAACGTCT	152	5		5	1
003FD	TAACGCCAGAAGGAATAACAATTGGACATTTAGCAACACGAGACATGCTTCCTCCA	56	5	5		1
0040A	TAATTCCTTTTGTTGCTTCAATCATTTGAAAACTTTCATTTTCTGGAATTACTGGACCCCAAGACACTTGTAAAAAATGAGTAATCATAGTCTCAATATTTTGCAAAACACACTCTTTAGAAGGAGGCGTAGTCAATGAATCTTCAGA	148	5	5		1
0040D	TAAATAGGTCTTGTCAGCCTCATAAGCACGCTGTATGTGTGTAAATTTGTGCTCCATTAGAAAGAAAATACATTTGGTAAAGGGGAGGAGAAGACTAGCGGTGACTGTCGGATCCAAAAGCATCATCAATCTTCTTATAGATCGCTCTTCTATCAGTTTTCTAAACAGCAGTTCTCAAAA	180	5	4	1	2
00410	TAAGGCATGACGAATCCCTTGAGCACTGACGCCAAAACGTTGAGCCCGTTCGTATTGGTAATCATCAGGATAAGTAGCGACATCTTGTGCCAGCGCTTCCATATCTATTTTGGTAGCCGGTTTATTGTGCGTCGTGCAAGGCGTTATGCGGCGATTCCAGCGCATAAGACTCGCCATCCCTACGCCAAAACGAGACGCTGTTTTCGCATACGTCAGTTTTTCTTTTTCTTT	231	5		5	1
00411	TAATCCAGGCATGAAAAATATCGCTATCGATATTACACTGGAAAGCACAGACGGTTATCAGCGCTCCCTCCAGTAAAGCGCCGATAATA	89	5	2	3	2
00413	TAAATCTGAATCTGCTATTCCCGTTGAACAATTTCAAAATTCTCAAGGTTTATTAGATATTCAGGTAGGAGATCAAATTGATGTTGCTTTAGATGCTATTGAAGATGGATTTGGAGAAACACTTTTATCTCGAGAAAAAGCAAAACGTCATGAAGCGTGGTTGATTTTAGAAAAAGCTCATGAAAAATCAGAAACAGTCATTGGAATTA	209	5	5		1
00415	TAACATCCGTATTGGTTTGGATAATAGGTTACGTATCTACGGAGATGAGCAACTGCTCGTGACGCATCTCTTGCAGGAAGTCACTCAGGGCTGGCAAAAGGTGCCAGAACATCATCAAGCCCTTTGGCAACAGGTCAATCGAGTAGAGTCTCGTTCGCTCAGTGTGTATGAGGAACTACTGTGATGGAGATGGAAAGCGTGTTGACACGCTT	212	5		5	1
0041B	TAATAAGCCTATTGCCCTCAGTTTTTTTCGCGCTGTCCCAGGAGCTCGCGGTAAAAGGTGGTGATGATGGCTTCCAGCGCTTGCGGGTAATTATTCGCCAAGCAGGTCAAATTGTCGCGAGTGAAGTCATCGGGGAGCGCCCAGGCGTCGGTAATGCTCTCGACAAAATCGAGTCCGGTTTGGTTTTTGCGTTTTTCCATCGCCGCTACCTCA	213	5		5	1
0041D	TAAACGCAATAGATTTAGATATGAACCATATTCCTGATGCAGCAATGACTGTGGCAATTTTAGCTCTTTTTTCTAAAGGCACGACGATTATTAGAAATATATATAACTGGCGA	113	5	5		1
0041F	TAATGCATTTGCAACAGGTGCACGTCGTAATTCTGCTCTAATTGCTGTTTCTACAGGATTATTAGAAAATATGACTCATCATGAAGCAGAAGCAGTAATTGCTCATGAAATTAGTCATATCGCAAATGGTGACATGATTACTATGACCTTAGTACAAGGTGT	162	5	3	2	2
00425	TAACTCATTATCAGATTTAGATAAACTGACCACTTTTGGTTTTCGAGGAGAGGCTCTAGCTAGTATTAGAGCCGTTTCAAGA	82	5	4	1	2
00434	TAATATGGATTTGGGGTCATCCAGAAGTTTATATCTTAGTACTACCAGTTTTTGGTGTATTTTCAGAGGTAGTGGCTACTTTTTCTAAAAAACGATTATTTGGATATGTTTCTTTGGTATGGGCAACATTATCTATTACTATTTTATCTTTTATTGTATGGTTACATCATTTTTTTACCATGGGAGCAGGAGCTGATGTAAATACTTTTTTTGGAATTACTACTATGATTATAGCAATTCCTACTGGTGTAAAGATTTTT	260	5	4	1	2
00437	TAAATCTGATTTTACTTCAGCTATAAATGACGATTCGAGCACACCTGCGCGATGCCCTCCAGTAGAAAAAGCCCAAGCTTTTGCAACTTCTAATCCTATTTTA	103	5	2	3	2
0043A	TAATTGCTGAATATGAAGGGGAAGGGAGAGGAAGTTATGGCGGCGCTATAGGTTATTTTACTGATTTAGGAAATTTAGATACTTGCATCACAATACGTTCAGCTTATGTGGAATCAGGTGTCGCAACAATTCAAGCAGGAGCCGGTGTT	149	5	2	3	2
0043B	TAAAGCGAACAGTGACCCGGTATTTTATTTGTTCATAGCTTGGATTTTTCACTTCCAAATCAACGAAAGGCGAAATATACTGGC	84	5		5	1
0043F	TAAATACAATAAAAATAACAGGTGTGATCCCGCACACACACAGTACCACCGCTAACCTACTCACAGAAGTCACCTCTCACCATAGACAACACTGAGTCTGCTACCAGTACCGACTACCGGGAACGCTGAGCGTTGAGCCAACCATGACCGTGCAGCAGGGCAGGTAAACAGACGAACAGTCAAAGTATACCTCGTGTCATCCTAGACTAGGAAAGAATAATGATAATGTGACATTGACAA	240	5	5		1
00441	TAATAAAATTATCATTAGGCAAAATAAACATAGAAAACTGTAAATTAGATAATGTGTATTCATGAGAACAGCACAAAAGAGTGCTATCTGGAAGAGACGAAATAATTTTTATAGAACGATACATTTCTAAATGTTTA	137	5	4	1	2
00445	TAACAGGAATAACAGAGCCAATCGAGTTTTCATTTATCATTGTTGCACCAGTATTATATGTTATTCATGCTATTTTAGCAGGATTATCTTTCCCATTATGTATTTTTTTGGATATGCGCGCAGGAACTAGTTTTTCTCATGGTTTTATAGATTTTATAGTA	161	5	5		1
00446	TAACATATACATATAACCAACAGTAACAGGTCTTTCAAATTTTTCGCCTGTTCTTCCATCAAAAAGTATAATTTGACCTGAAGTAGGTAAACCTGCAAATTTCAACATTTGTTTTATTTCATTTTCTTGTGCACCATCAAATACCGGTGTAGAAATAGGGATGCCA	166	5	2	3	2
00447	TAAAATCTAATTTGTTTCATATTGATGCGCTCGTAGCTCAGTTGGATAGAGCGCTACCCTCCGAAGGTAGAGGTATCAGGTTCAAATCCTGTCGAGCGCATTTTTTATAAAAAAA	115	5	1	4	2
0044A	TAACATCATTGACACACCTGGACATGTTGATTTTACTATAGAAGTAGAACGTTCAATGCGAGTGCTAGATGGCGCTGTTATGGTATATTGTGCAGTTGGAGGTGTGCAACCACAATCAGAAACTGTATGGCGTCAAGCGAATAAATATAATGTTCCTCGTATAGCATTTGTGAATAAAATGGATCGTATGGGAGCTAA	198	5	3	2	2
0044C	TAAAGGAGATGATTTTGAAAAACCAATGACTTTATTTCAAATTGTTACACGGATGACAATCCGTGATATTTTAGATGATAATATTATAAAAGAACAACAAGATCGAGTACAA	112	5	4	1	2
0044E	TAAAGATTTTTATAGACCTAAGATATGACAAATAGAATAAGTAATATCAGACTGATTCAAAGTGTAAAAATGAAAATTTTTTACTCCTTCACAAGATAATTTTTTTACCATATCTATAGCTATACTAGAACCAATTATTTTCTGTGTGAATATATCATCATCTAAACCA	169	5	3	2	2
0044F	TAACTGGAGCTTGTGTTACAGCATTAGGGGAATCGGTAAGTGGACTCTTTAGTAATAATGAAGAGTTATCAAATCAATTACTCCATGCATCGCAAGAAACAGATGATAAAATATGGAGTTTACCATTATTTTCAGAATATCATAAAGAA	149	5	3	2	2
00450	TAAATTTAGAGAAACTCGTAATTTTTTGTCATCTCGTGGTATTGTAGTTTATTTAGAAACTACTATTGAAAAACAATTAGCACGTACTAAGAGAGATAAAAAAAGACCCTTGTTGCAGAATGCTGATTCAAATCGGATGATATTAGAAAATTTAGCTTATGAAAGAAATCCTTTCTATGAAGAAATTGCAGATATAAAA	199	5	3	2	2
00451	TAAACTTGCTTTTGCACCATAAATAGATTCCCATTTTTTTGTCATTTCTCTTGCTATTACTATATGTCGATTTTTATCTATTTGTTCTATTATATCTTTTATACTTTCAAGTATCCTGTGTTTTGATTCATAAAAAATAATTGTTCGTGTTTCTT	155	5	5		1
0045C	CTTGATGGTAAGAATATTATCTGTGTTGGTATGTGAGTTCTATTTCTGTACCTAACAGAACCTAACCTAACCTCGTTACAATAATTCA	88	5	5		1
0045F	TAAGCCACATAACAAATAACTTCACCGCCAAGACCTTCTTGACGAGCCATACGATCTGTCATAACCCCTTTAGAAGTAGAAATTACGGCTATTCCTAAACCGGACATTACTTTAGGTAGATTATTTTTGTTTTTATATATACGCAAACTAGGCCTACTAATACGTTGAATCATATCTACTACTGACTTCCCTTGAAAATA	200	5	5		1
00460	TAATTGATTGCACATATAACAAGGAAAATAGAAATTTTGATAAAATTGAAGGTATACGCTAATATAAATATTGACTCTTATTATATTTCTATTAGATTAGTCTTTTCTAATGTATACTTCCAATTCTATTTATACGTATACCAGTAGGCCATTCATTTTCATTTTTATCAAAACTCATCCATA	183	5	4	1	2
00461	TAAAAAATTTTTTACTTCTGTTTTTATTTTTTCTATATAGTCTTCTGTGCTCCAATCAGCACGACCAGAAGCGATAATGCGTGTATATTTATGTATTTTTTTAGATTTTTCTAATTTATATAAAGCTGGTAATAATTTTCTTTTTGTTAGATCTCCTTTAGCGCCAAAAATTACTAAATCGCAAGCGTGATTTGTTTCTATTATCATAATTTTCT	215	5	2	3	2
00465	TAACAAGTCATATTTTAGATGATGGCAGTCAAACTTGGTCTGTACCAGTGCAAACATTAGTTTTTTTGACATCTCTGACTTTTCTTCCAGCATTTCTTTTGATGATGACCAGCTTTACAAGGATCGTGATTGTTTTTGGTCTATTACGAAATGCATTGGGAACTCCATATGCACCACCAAATCAAATATTACTTGGTTTAGCT	203	5	4	1	2
00467	TAATTCTAGTTATACTCAAAAGATAATATATGAATATTCTTGTTCTAACACTATAAAAATAATAGGTACAAATAAATTGGCTGTAATAGCTGAAAAAAAATTCGAGGAGTAGCAGTTTCGCAAAAAAAA	129	5	3	2	2
00468	TAAATAAGAAGCTTCAGAAGATTCTATATGTATTGATTGAGGCAAATTCTGATAAAGCACTTTACCATCATCAGATATAATTGATCTTACTGATGATAAAGACGACTTATAACCACCACTTCCAATTATTTGAAAAACTTGTGCTATTTCAAAAGGT	157	5	4	1	2
0046A	TAAATCAATCAGGAACTTCTCTAAACGATGTAATGATCAATTTAGAAAAATCTTCTATTTCTATGCAATTAGCAGTACAAATAAGAAATAAAATTGTATCAGCTTATCAAGAAATCATGAGTCAACAAATATAATTTATAAAAGTTACTGTGCTGAATAAAAAAAAATTTAGCACAG	177	5	2	3	2
0046C	TAAGAAAATAGGAAGAGAATGAATATGAACAAAATTCTTATTTTTGCATCTAGTGTTTTATTCCTTATATTGTCTTCTTCTTTTTTTATTGTAAAAGAAGGAGAGCGTGGTATTGTTTTACAATTTGGAAAAGTTCTCCGTAATAATGAACTAAAGACAGTAGTATATAATCCTGGATTACA	182	5	3	2	2
0046D	TAATTACAAGTGGTTATTTTTTTATGAAAGCACTTTCTTCAAGTGGCGCGAAAATTATTCCTATTGATAGCGAACATAATGCTATTTTTCAAGTGTTACCTTTAGAAATTCAAAAAAACTTAGGTAAAACTACTCTAGAGAAAAATAGTATCAAGCATCTT	161	5	4	1	2
00478	TAATATTTCTTATTTCTAACCAAAGTTTTTTTATAAGATTTTCTACTAAATTACGTATTTTTTTAGCACTCATAAAAGAGACTTCAATATCAATTTGCGTGAATTCTGGTTGTCGATCTGAACGTAAATCCTCATCACGAAAACATTTTACTATCTGATAGTATCTATCTATTCCAGAAATCA	183	5	3	2	2
0047A	TAATAAAGTACAGCCCATGAATTTTGCTTTGAATGAACTATCAGTACAAACATGGTTTGCTGGATTGCGTCGTGATCAATCAAAAAGTCGAAATTTATTACCATATCTTTCTA	113	5	3	2	2
0047C	TAAAATCTGGTATCGAATTATCTTTTGAAAAAATGATTGAAACGGGTATCAAAGAAGAATCAGCTTATTACGAATCCTTACATGAACTTCCATTGATTGCCAATACTATTGCAAGAAAAAAATTATATGAGATGAATAAAGTTATTTCAGATACTGCTGAATATGGTAGCTATCTTTTTTCTGAATCTGCATATCCTA	198	5	1	4	2
0047D	TAATAATACTATCGTTACAATTACAGATAGACAAGGGAATGCTTTAGGATGGGCTACTTCTGGCGGTTCTGGTTTTAGAGGTTCTCGAAAATCTACTCCTTTTGCTGCACAAGTTGCTGCTGAACGTTGTGCGGAAATAGTAAAAGATTATGGTATAAAAAATTTAGAAGTAAT	174	5	4	1	2
00483	TAAACCACATGTTGCTGCTACAAATGCACTCATGGTTGAAATATTGATAGTGTTTTTAGCATCTCCTCCTGTTCCTACGATATCAGAAAAAATATAATCAGGTTTTGGAAAATATTTCATTTTGTCTAAAAATGCTTTTATTGCTCCTGTTATTTCTTCGATTGATTCACCTCGTATTTTCATTGCT	187	5	4	1	2
00484	TAAATTTCTATCCTAAGGGTGGGTACGGGATATTCTCGATAAAGAAGTGGGTAACCCCAATTCCAACCTGAAGCCGAACTACTCAGCAACAACGGTGTGAGCCATTTCTCGAGGATGAGTAACCGCTTCAAAAATA	136	5	1	4	2
00487	TAAAAACGAACATACCTCATATTTACGCTATTGGTGATGTAGCTGGTACACCTATGTTGGCGCATAAAGGAGTTCATGAAGGTCATATTGCAGCAGAGGTTATTTCTGGTAAAAATCATTATTTCGAACCTAAAGTAATTCCATCTATTGCATATACTGATCCTGAAATTGCTTGGGTAGGATTGAGTGAAAAAGAGGCTAAACAAGAAAATATAAATTATGAGGTTGCAATTTTCCCTTGGAATGCAT	249	5	5		1
0048C	TAATACGATATGGCTCTGCGATAAAATCTTTCATCAATCGTGCTGCTAGATGAGGTTGTTGACTGTATGAAGCATGAATAAAACCTGCTAAATAACGACTA	101	5	5		1
0048E	TAAACCTTCAAGTAATCGGATACTCGCACCAGTAAATGGAACGATTGGAAAAATATTTGAAACTATGCATGCTTTTTCAATCATTTCAGAAGATAATGTTGAATTATTTATACATTTTGGTATTGATACCGTAAAA	136	5	5		1
0048F	TAAATGAAATCAATACAGATACAGATGAAGATGCAGTTGAAGCAGCAACTCAGGTACTATCTAGTGTAGAATCTGAATTAGGACGAACTACTGATCCTGTACGCATGTATATGAGAGAAATGGGTACTGTTGAATTACTCACACGAGAAGGAGAAATTGATATTGCTAAACGTATTGAAGAAGGCA	186	5	3	2	2
00494	TAATTTGTCCTGATGATGTTCCTACAGATAAATCTGCTATAGAAGCGTCTTCTGTTTCACCTGAACGATGAGAAATAATTACTCCATAGTTTGCTTGTTTTGCTGTTTTTATTGCTTCTAGAGTTTCA	128	5	4	1	2
00495	TAATTACTTTGTCACAATCAGGAGAAACTGCTGATACGTTATCTGCATTGAGGTATTCTAAAAAACTTGGATACTTAGGAAATCTAACTATATGCAATATGAAAAGTTCATCTTTAGTAAGAGAATCTGATTTTTATATACTAACTAAAGCGGGATTAGAAATAGGTGTGGCTTCTACAAAATCTTTTACGACTCAATTGACTGTTTTACTTTTATTAGTTGCTAAAATAATAAATTCAAAAAAAGAAAACAATAATACCTCAAAAAGAATTGTAC	276	5	5		1
00496	TAACTGTAATCCAGAAACAGTATCTACCGATTATGATATTTCAGATAGATTATACTTTGAACCAATTACATTAGAAAACGTTTTAGAAATAGTCAGAATAGAAAAACCAAAAGGAGTTATCATTCAATATGGAGGTCAAACCCCA	145	5	4	1	2
00497	TAATGCTGTCGCCCGGACCTAGTTTGCCGAAACACGCAGGATGCATGTTAGA	52	5	3	2	2
0049A	TAAATACTTTATAATTGATAATATCATTCCAATAGTAATCATTTTTTTTCAACGCAGGTAATGTATGTTTACTAATTATTATGTCTGCATTAGTAAACTGACTGACTACTGAACGATCAGAAATATCTTTTATGTGAACAATAAAATTATTCTTATATTTTTTCCA	166	5	4	1	2
0049F	TAAAATTGGTATGAATGTTATTGATTTAGGCGCTGCTCCTGGAAGTTGGTCACAATATGCCAGTAATAGAATAGGAAAAAAGGGACGTATTATAGCTTGTGATATATTACCTATTAGACCAATAACAGGTGTTGATATTTTTCAAGGAGATTTTCGTAATAAAAAAACACTCAA	174	5	4	1	2
004A2	TAATTCTTTTGCTTCTTTTTTGAACTCTTTCAGATGGCATCTTTTTATGATAAACACCTTGTTCTCCAATTACCCAGGATAACGGCCTTCTTTCTTCATTGATCAATTTTTGCAACAGTA	120	5	3	2	2
004A3	TAAATGTGTTGTCGCTTTTCCTGTCGGTGCAGATAACTGAATTTTTATTGATTTTTTTGAACTTTTTA	68	5	5		1
004A4	TAATAGCAACATCTTTTGAAGCATCTGTTTTTGAAAGATTACCCTGAGTATGAATTCTTTCGGTAGATACCGGTCTTACTCCAGTACCTAATTGCAATCCTGACGGTAAAGTTGTTTCAAGTGAGGAATTTGTTCCTGCTTCTCGTATCGTTTGATACA	159	5	4	1	2
004A5	TAATTTGACCTGTATTTAGATTTCTTCCTGGTTGTAATTCTAAAATAATTGAAGCTGATGATTTCTTTTTATCCTGTAAAAATAGTGATGATTTAGAAAATGCTATATGTATTCTGGCATTTTTTACAGAA	131	5	5		1
004A8	TAAATCTACGAATCTGACTCGGTGAAACATAAATATCATCAGGACCAGCTAAATAAGAGCTATCTGCAGAACGTAGAAAGCCAAATCCATCTTGTAGTATTTCTAAAACACCGTCTCCAAATATATCTTCTCCACTTTTTGCATGTT	147	5	4	1	2
004AB	TAAACGGAAACACTCCGCTGCATTTGGCCGCTAGAAATGATAATCTTTCTGTGATCAATAGTCTATTGTACCGACAGCCCCAAGTTGCCTGTGAACAAAACCATGTAATAACGATAATTGAATCGCAAATTTTGGACATCATTA	144	5	2	3	2
004AD	TAATAAAATATGGAGATAGATAACCACGATCAAATTGCATCCCTTTGACAACTTCAAGTTCATCCTGTAAACCTGTACCTTCTTCTACTGTAATAACTCCGTCATTACCGACTTTTTCCATTGCTTCTGCAA	132	5	2	3	2
004AF	TAAAGTACGTGCTGCTTTAGAAGCTGCTCGAGTTTTACGTCGTCCTGTAGATATAGCAAGTTGGCAAAATACGAAAAA	78	5	3	2	2
004B0	TAACTTATCGTAAAAATAACCGTGTAGCACATCAACGGAAAATGGGGGCAGGCC	54	5	1	4	2
004B2	TAAATTTTATAGAAATTTCTTGCATTTGACTTTTTTTTATACATGATTATCTATCCACGTCAGACATTACAAAATCGATACTACCTAAATATACAA	96	5	3	2	2
004B3	TAAAAGAAAAAGAAGGAAATCCAAATATAAAAATGCGGATTCGTCAAGCAATGAAAGCTGTTATGCGCAGAAGAATGATTATCAATACTCCTAAAGCTGATGTAATTATCACTAATCCTATACATTATTCTGTTGCA	137	5	5		1
004B6	TAAAAAAGTAAATATGTTACTCATCTGAGAAATAGATAAATGAAAATAATTAGAAATATTCCCCATTATCATCCCTGTGACAACAACTAATGCACCGGTAAATGCATATGACAAAAAACTAATCCATGTAAGTCCTATTCGATTGATGTTTGTCATTTTTTATCACCTTTTCTGATAAATTTTCGTAAAAATATAATTTATATATATTATATTTTTTTATATTTTTCAATATATTATGTAATATTGTATAAAAATT	256	5	4	1	2
004B7	TAATGTTCCAAAGGTAATAATTTGTGCTACTGAATTTTTACCATATATCTCTGAAACATGATCAATTACTTGATCACGTTTTTCCATACAAAAATCAATATCAAAATCAGGCATAGAAATACGTTCTGGA	130	5	4	1	2
